# Supplementary material
Source: MDPI journal article supplement (https://www.mdpi.com/2073-4395/11/2/364)
Supplement: s1 [file s1 › agronomy-1067330-supplementary TABLES.xlsx]

## Sheet: Table S1
Table S1. Measured phenotypic traits in this study by using PlantScreenTM Modular system (PSI, Czech Republic).
Category		Definition	Abbreviation
1	Chlorophyll fluorescence parameters	Maximum fluorescence in light steady-state	Fm’
2		Fluorescence in light steady-state	Ft’
3		Minimal fluorescence in light steady-state	Fo’
4		Variable fluorescence in light steady-state	Fv’
5		Difference in fluorescence between Fm’ and Ft’ in light steady-state	Fq’
6		Maximum quantum efficiency of photosystem II (PSII) photochemistry	Fv’/Fm ’
7		PSII operating efficiency	Fq’/Fm’
8		Coefficient of photochemical quenchingin light steady-state	qP
9		Fraction of open PSII centres (oxidized QA)	qL
10	Geometric	-	RGB side view	Area_mm2
11		-		Perimeter_mm
12		-		Compactness
13		-		Width_mm
14		-		Height_mm
15		-	RGB top view	Area_mm2
16		-		Perimeter_mm
17		-		Compactness
18		-		Roundness
19		-		Roundness2
20		-		Isotropy
21		-		Eccentricity
22		Rotation mass symmetry		RMS
23		Slenderness of leaves		SOL
24		Volume of plant digital biomass	Volume
25	Color	-	RGB (132,144,88)
26		-	RGB (79,99,59)
27		-	RGB (101,119,75)
28		-	RGB (55,74,57)
29		-	RGB (71,94,86)
30	Temp.	Difference between canopy average- and air temperature (Temp)	∆Temp-average
31	Water	Water use efficiency	WUE

## Sheet: Table S2
Table S2. Pairwise comparisons test using mixed models for determining the significant differences between the means of four wheat genotypes for soil relative water content (SRWC) in Figure 2A at different time points. The p-values below 0.05 are highlighted in green.
Treatments	Control						Drought						Heat						Combined
contrast	Days.after.inducing.stress	estimate	SE	df	t.ratio	p.value	Days.after.inducing.stress	estimate	SE	df	t.ratio	p.value	Days.after.inducing.stress	estimate	SE	df	t.ratio	p.value	Days.after.inducing.stress	estimate	SE	df	t.ratio	p.value
LM19 - LM62	1	2.03822	1.0447	21.2491	1.95102	0.237621	1	-0.0566171	1.60777	65.7888	-0.0352147	0.999984	1	0.475524	0.800993	18.7387	0.593669	0.932738	1	0.713287	1.65181	22.6196	0.431822	0.97238
LM19 - NS3	1	1.59943	1.06342	22.0384	1.50405	0.452064	1	-0.764331	2.00171	24.3072	-0.381839	0.980611	1	-0.909091	0.800396	21.7995	-1.1358	0.67199	1	-0.377622	1.1996	20.1119	-0.31479	0.988867
LM19 - SF1	1	0.736023	1.04375	21.1833	0.705174	0.893913	1	-4.55768	2.33135	18.6259	-1.95495	0.240155	1	0.027972	0.876235	16.4631	0.031923	0.999988	1	-0.237762	1.41555	22.2152	-0.167965	0.998262
LM62 - NS3	1	-0.438783	0.817331	67.1636	-0.536848	0.949729	1	-0.707714	1.93568	21.5668	-0.365614	0.982843	1	-1.38462	0.875187	20.1975	-1.58208	0.41044	1	-1.09091	1.44429	18.787	-0.755325	0.873261
LM62 - SF1	1	-1.30219	0.791571	84.6221	-1.64507	0.359276	1	-4.50106	2.27491	17.8138	-1.97856	0.232784	1	-0.447552	0.945043	17.3331	-0.473579	0.963906	1	-0.951049	1.6281	22.8875	-0.584146	0.935846
NS3 - SF1	1	-0.863411	0.816118	66.8515	-1.05795	0.716046	1	-3.79335	2.56849	21.1262	-1.47688	0.468246	1	0.937063	0.944537	17.9888	0.992087	0.755718	1	0.13986	1.16674	21.6978	0.119872	0.999364
LM19 - LM62	3	-0.09908	1.03642	23.675	-0.095598	0.999678	3	-1.3305	1.59967	83.7329	-0.831734	0.839238	3	2.53147	0.819429	20.3323	3.08931	0.0269409	3	4.15385	1.64107	23.9057	2.53118	0.0803264
LM19 - NS3	3	-1.08988	1.07455	25.6453	-1.01426	0.742661	3	-3.04317	2.02335	24.3518	-1.50402	0.450542	3	-3.46853	0.797149	23.7114	-4.35117	0.0011863	3	-3.3986	1.2534	20.9469	-2.71151	0.0584882
LM19 - SF1	3	-1.57113	1.03616	23.6514	-1.5163	0.444007	3	-6.94975	2.27055	19.8183	-3.06082	0.0291324	3	0.699301	0.87704	18.0359	0.797342	0.854716	3	-0.601399	1.47149	23.8208	-0.408699	0.976421
LM62 - NS3	3	-0.9908	0.832318	76.8904	-1.19041	0.634724	3	-1.71267	1.99071	22.8927	-0.86033	0.824959	3	-6	0.867754	21.3133	-6.9144	4.08955e-06	3	-7.55245	1.39834	20.7855	-5.401	0.000132828
LM62 - SF1	3	-1.47205	0.782124	124.703	-1.88211	0.240998	3	-5.61925	2.24151	19.4901	-2.5069	0.0900961	3	-1.83217	0.941674	18.544	-1.94565	0.243856	3	-4.75524	1.59676	24.7453	-2.97805	0.0304798
NS3 - SF1	3	-0.481246	0.831989	76.7048	-0.578428	0.938264	3	-3.90658	2.56113	22.5004	-1.52533	0.439709	3	4.16783	0.922352	19.0647	4.5187	0.00122527	3	2.7972	1.1948	24.0612	2.34115	0.116588
LM19 - LM62	6	-0.19816	1.03926	26.8505	-0.190674	0.99748	6	-4.47275	1.59753	104.275	-2.79979	0.0305503	5	2.93706	0.838747	21.3589	3.50173	0.0103765	5	6.25175	1.63583	24.6193	3.82175	0.00415575
LM19 - NS3	6	-2.51946	1.10548	30.4597	-2.27907	0.125375	6	-7.64331	2.06319	23.483	-3.70461	0.00583884	5	-6.51748	0.795247	25.1257	-8.19554	8.43186e-08	5	-7.35664	1.31194	21.2178	-5.60747	7.72382e-05
LM19 - SF1	6	-3.14225	1.04003	26.9135	-3.02131	0.026386	6	-12.0453	2.18354	21.6479	-5.51641	8.9073e-05	5	3.65035	0.879074	19.449	4.1525	0.00267811	5	-1.13287	1.53135	24.4816	-0.739785	0.880071
LM62 - NS3	6	-2.3213	0.872665	75.3189	-2.66002	0.046095	6	-3.17056	2.07825	23.8665	-1.52559	0.438615	5	-9.45455	0.861511	21.9739	-10.9744	1.27519e-09	5	-13.6084	1.35756	23.1298	-10.0242	4.00358e-09
LM62 - SF1	6	-2.94409	0.788113	178.09	-3.73562	0.00142742	6	-7.57254	2.19778	22.2953	-3.44555	0.0113232	5	0.713287	0.939443	19.5192	0.759266	0.871614	5	-7.38462	1.57061	26.1712	-4.70176	0.000400557
NS3 - SF1	6	-0.622788	0.873583	75.3644	-0.712912	0.89168	6	-4.40198	2.55633	24.0978	-1.72199	0.334634	5	10.1678	0.900818	20.0171	11.2873	2.26498e-09	5	6.22378	1.22964	25.3821	5.06144	0.000169513
LM19 - LM62	8	-1.74098	1.05125	28.2181	-1.65611	0.364942	8	-6.87898	1.6028	107.403	-4.29186	0.000225443	6	14.6014	0.848718	21.6434	17.2041	2.78e-13	6	5.94406	1.6353	24.7273	3.63484	0.00653271
LM19 - NS3	8	-3.25548	1.13498	32.4587	-2.86833	0.0345157	8	-11.3234	2.09444	22.534	-5.40643	0.00010141	6	6.23776	0.794804	25.5766	7.84818	1.64512e-07	6	-9.58042	1.34279	21.1974	-7.1347	2.62983e-06
LM19 - SF1	8	-2.98655	1.05269	28.3402	-2.83706	0.0392218	8	-16.0085	2.12858	22.8511	-7.52073	7.2725e-07	6	0.951049	0.880548	20.0529	1.08006	0.705284	6	-1.76224	1.5626	24.5075	-1.12776	0.676309
LM62 - NS3	8	-1.51451	0.910243	68.3092	-1.66385	0.350605	8	-4.44444	2.13962	23.9327	-2.07721	0.189221	6	-8.36364	0.858843	22.0987	-9.73826	1.0798e-08	6	-15.5245	1.33925	24.4457	-11.5919	1.17983e-10
LM62 - SF1	8	-1.24558	0.805314	183.7	-1.5467	0.411876	8	-9.12951	2.17306	24.317	-4.20122	0.00164991	6	-13.6503	0.938756	19.8852	-14.5409	2.73632e-11	6	-7.70629	1.55955	26.6297	-4.94134	0.000205326
NS3 - SF1	8	0.268931	0.91191	68.4053	0.29491	0.990997	8	-4.68507	2.55732	24.7283	-1.83202	0.282801	6	-5.28671	0.890311	20.415	-5.93805	4.22877e-05	6	7.81818	1.24944	25.6345	6.25736	7.73076e-06
LM19 - LM62	10	-1.85421	1.07102	28.7664	-1.73125	0.3266	10	-7.68577	1.61336	101.92	-4.76382	3.70716e-05	7	3.46853	0.858888	21.7797	4.0384	0.00290914	7	4.82517	1.63616	24.6664	2.94909	0.0325741
LM19 - NS3	10	-3.38287	1.17097	33.1377	-2.88895	0.0326055	10	-12.7105	2.12925	21.4549	-5.96948	3.23495e-05	7	-2.40559	0.7947	25.8306	-3.02705	0.0266384	7	-11.2867	1.37461	21.0977	-8.21083	2.98672e-07
LM19 - SF1	10	-3.01486	1.07311	28.9335	-2.80946	0.0413888	10	-18.2873	2.0763	23.9892	-8.80766	3.21457e-08	7	1.45455	0.882326	20.5656	1.64853	0.375008	7	-2.34965	1.59467	24.3711	-1.47344	0.468117
LM62 - NS3	10	-1.52866	0.955223	60.4152	-1.60032	0.386168	10	-5.02477	2.20318	23.6432	-2.28069	0.131243	7	-5.87413	0.856483	22.0771	-6.85843	3.82931e-06	7	-16.1119	1.32241	25.859	-12.1837	1.91106e-11
LM62 - SF1	10	-1.16065	0.832375	164.852	-1.39438	0.504654	10	-10.6016	2.15204	26.3789	-4.92628	0.000218587	7	-2.01399	0.938357	20.155	-2.14629	0.172626	7	-7.17483	1.54989	26.8768	-4.62924	0.000458337
NS3 - SF1	10	0.368011	0.957561	60.494	0.384322	0.980517	10	-5.57679	2.56165	24.9474	-2.17703	0.157354	7	3.86014	0.879985	20.7408	4.3866	0.00139669	7	8.93706	1.27071	25.6417	7.0331	1.12955e-06
LM19 - LM62	13	-3.86412	1.11434	28.1291	-3.46763	0.00874083	13	-7.16207	1.63891	84.9592	-4.37002	0.000202074	8	0.993007	0.869249	21.7777	1.14237	0.668062	8	2.7972	1.63841	24.4442	1.70727	0.341592
LM19 - NS3	13	-7.13376	1.23587	32.0227	-5.77227	1.20736e-05	13	-12.7105	2.18779	19.7828	-5.80977	6.33036e-05	8	-4.46154	0.794935	25.8783	-5.61245	3.86263e-05	8	-13.0629	1.40733	20.9333	-9.28206	4.15043e-08
LM19 - SF1	13	-6.11465	1.11731	28.3241	-5.47266	4.17469e-05	13	-18.9384	2.00334	25.4238	-9.45344	4.89271e-09	8	1.28671	0.884406	20.972	1.45489	0.481032	8	-2.68531	1.6275	24.1042	-1.64996	0.370986
LM62 - NS3	13	-3.26964	1.03442	49.6275	-3.16085	0.0138172	13	-5.54848	2.3022	22.7449	-2.41008	0.103543	8	-5.45455	0.854431	21.9091	-6.38383	1.15314e-05	8	-15.8601	1.3071	27.3628	-12.1339	9.41502e-12
LM62 - SF1	13	-2.25053	0.8894	118.59	-2.53039	0.0603869	13	-11.7764	2.12769	29.2442	-5.53482	3.18532e-05	8	0.293706	0.938245	20.3202	0.313038	0.98905	8	-5.48252	1.54165	26.8924	-3.55627	0.00729391
NS3 - SF1	13	1.01911	1.03761	49.6511	0.982165	0.760192	13	-6.22788	2.57438	24.4967	-2.41918	0.0997479	8	5.74825	0.869846	20.9786	6.60835	8.61309e-06	8	10.3776	1.2934	25.4374	8.0235	1.13953e-07
LM19 - LM62	15	0.268931	1.15152	27.0043	0.233544	0.995404	15	-5.80326	1.66217	72.2462	-3.49137	0.00448057	9	2.55944	0.879794	21.651	2.90913	0.0381143	9	2.29371	1.64204	24.0753	1.39686	0.513324
LM19 - NS3	15	-1.4862	1.28555	30.4155	-1.15608	0.658384	15	-10.7714	2.23076	18.7005	-4.82858	0.000646151	9	-3.41259	0.79551	25.7201	-4.28981	0.00120262	9	-13.007	1.44089	20.716	-9.02706	7.26379e-08
LM19 - SF1	15	-3.58103	1.15502	27.1949	-3.10042	0.0218149	15	-16.4614	1.95865	26.0541	-8.40446	3.97215e-08	9	1.41259	0.886785	21.2599	1.59293	0.403577	9	-3.35664	1.66106	23.7366	-2.02078	0.208739
LM62 - NS3	15	-1.75513	1.09371	43.6129	-1.60475	0.386631	15	-4.96815	2.37043	21.9488	-2.09589	0.185608	9	-5.97203	0.852691	21.6007	-7.00374	3.13291e-06	9	-15.3007	1.29336	28.9382	-11.8301	7.81097e-12
LM62 - SF1	15	-3.84996	0.936817	90.7875	-4.10962	0.000496419	15	-10.6582	2.11636	30.6953	-5.0361	0.000112118	9	-1.14685	0.938421	20.3756	-1.22211	0.620412	9	-5.65035	1.53485	26.6696	-3.68138	0.00538121
NS3 - SF1	15	-2.09483	1.09739	43.6122	-1.90893	0.239291	15	-5.69002	2.58697	23.7382	-2.19949	0.152368	9	4.82517	0.859902	21.1127	5.61131	7.78962e-05	9	9.65035	1.31743	25.0595	7.32514	6.4065e-07
LM19 - LM62	16	-0.629371	1.17238	26.3192	-0.536833	0.949239	16	-3.74825	1.6756	66.136	-2.23696	0.123966	10	4.88112	0.890518	21.4157	5.48121	0.000100202	10	0.853147	1.64705	23.5791	0.517986	0.953944
LM19 - NS3	16	-2.15385	1.3121	29.4958	-1.64152	0.371868	16	-7.65035	2.25336	18.1776	-3.39508	0.0153779	10	-2.57343	0.796423	25.3658	-3.23123	0.0167848	10	-13.2448	1.47523	20.4553	-8.97812	8.8512e-08
LM19 - SF1	16	-2.71329	1.17611	26.5033	-2.307	0.121914	16	-12.5315	1.93758	26.2234	-6.46757	4.10509e-06	10	3.07692	0.889461	21.4208	3.45931	0.0113948	10	-3.65035	1.69529	23.2946	-2.15322	0.166183
LM62 - NS3	16	-1.52448	1.12501	40.9678	-1.35508	0.534106	16	-3.9021	2.40515	21.5143	-1.62239	0.387666	10	-7.45455	0.851265	21.163	-8.75702	1.00869e-07	10	-14.0979	1.28126	30.5491	-11.0031	2.22934e-11
LM62 - SF1	16	-2.08392	0.962945	79.3894	-2.16411	0.142315	16	-8.78322	2.11219	31.187	-4.15835	0.00126826	10	-1.8042	0.938884	20.3195	-1.92164	0.250408	10	-4.5035	1.5295	26.2155	-2.94442	0.031896
NS3 - SF1	16	-0.559441	1.1289	40.9605	-0.495563	0.959629	16	-4.88112	2.59448	23.2488	-1.88134	0.263117	10	5.65035	0.850159	21.1281	6.64623	7.65706e-06	10	9.59441	1.34272	24.5457	7.14549	1.10561e-06
LM19 - LM62	17	-0.461538	1.19464	25.5873	-0.386342	0.979968	17	-3.86014	1.69019	60.3382	-2.28385	0.113228	11	3.44056	0.901414	21.0886	3.81685	0.0051077	11	-0.237762	1.65341	22.9781	-0.143801	0.998907
LM19 - NS3	17	-1.14685	1.33971	28.5468	-0.856046	0.82713	17	-4.61538	2.27668	17.6685	-2.02724	0.215601	11	-2.93706	0.797673	24.8333	-3.68204	0.00579636	11	-12.6853	1.51029	20.1594	-8.39926	2.91625e-07
LM19 - SF1	17	-0.251748	1.1986	25.7632	-0.210035	0.996639	17	-6.61538	1.9174	26.2708	-3.45018	0.00967086	11	2.01399	0.892431	21.4508	2.25674	0.140077	11	-3.16084	1.73017	22.8002	-1.8269	0.287018
LM62 - NS3	17	-0.685315	1.15728	38.5512	-0.592177	0.933841	17	-0.755245	2.44026	21.0635	-0.309494	0.989419	11	-6.37762	0.850154	20.6114	-7.50173	1.45066e-06	11	-12.4476	1.27084	32.1349	-9.79476	2.13015e-10
LM62 - SF1	17	0.20979	0.990519	69.6755	0.211798	0.996611	17	-2.75524	2.10903	31.4804	-1.3064	0.565808	11	-1.42657	0.939634	20.1539	-1.51822	0.445597	11	-2.92308	1.52563	25.5509	-1.91598	0.246555
NS3 - SF1	17	0.895105	1.16137	38.5402	0.770729	0.867138	17	-2	2.6028	22.7003	-0.768404	0.867798	11	4.95105	0.840624	21.0126	5.88973	4.20752e-05	11	9.52448	1.36921	23.9308	6.95618	1.98594e-06
LM19 - LM62	18	-6.36364	1.21823	24.8305	-5.22368	0.000118891	18	-2.16783	1.70591	54.9131	-1.27078	0.58518	12	3.72028	0.912475	20.6868	4.07713	0.00287617	12	0.111888	1.66113	22.296	0.0673566	0.999887
LM19 - NS3	18	-6.90909	1.3683	27.5947	-5.04939	0.000140972	18	-2.72727	2.3007	17.1737	-1.18541	0.643727	12	-3.46853	0.799259	24.1469	-4.33968	0.00118172	12	-10.6573	1.54603	19.8349	-6.89336	6.28758e-06
LM19 - SF1	18	-2.92308	1.22241	24.9972	-2.39124	0.104842	18	-1.17483	1.89813	26.1779	-0.618938	0.925102	12	1.56643	0.895693	21.3508	1.74885	0.324435	12	-2.18182	1.76564	22.2716	-1.23571	0.611521
LM62 - NS3	18	-0.545455	1.19046	36.3494	-0.458189	0.967591	18	-0.559441	2.47573	20.6013	-0.22597	0.9958	12	-7.18881	0.849358	19.964	-8.46381	2.7834e-07	12	-10.7692	1.26213	33.6065	-8.53256	3.74255e-09
LM62 - SF1	18	3.44056	1.01942	61.4887	3.37501	0.00685491	18	0.993007	2.10688	31.5498	0.471316	0.964824	12	-2.15385	0.94067	19.8845	-2.28969	0.134255	12	-2.29371	1.52324	24.7073	-1.5058	0.449313
NS3 - SF1	18	3.98601	1.19474	36.3371	3.33631	0.0101499	18	1.55245	2.6119	22.104	0.594374	0.93271	12	5.03497	0.831304	20.7572	6.05671	3.0395e-05	12	8.47552	1.39683	23.2452	6.0677	1.86029e-05
LM19 - LM62	19	-3.37063	1.24307	24.0665	-2.71153	0.0551922	19	0.321678	1.72273	49.8932	0.186726	0.997659	13	1.94406	0.923695	20.2262	2.10465	0.18533	13	-0.335664	1.67017	21.5555	-0.200976	0.997036
LM19 - NS3	19	-4.5035	1.39782	26.6586	-3.22179	0.0165813	19	-0.545455	2.32538	16.6932	-0.234565	0.995276	13	-3.07692	0.801179	23.3346	-3.84049	0.00424332	13	-8.64336	1.5824	19.4875	-5.46217	0.000142853
LM19 - SF1	19	-3.51049	1.24746	24.2237	-2.81411	0.0442009	19	-1.18881	1.8798	25.9276	-0.632414	0.920628	13	0.265734	0.899243	21.1263	0.295509	0.990757	13	-1.31469	1.80168	21.723	-0.729698	0.884122
LM62 - NS3	19	-1.13287	1.22446	34.3471	-0.925197	0.791598	19	-0.867133	2.51156	20.1319	-0.345257	0.985436	13	-5.02098	0.848881	19.2406	-5.91482	5.61875e-05	13	-8.30769	1.25518	34.8443	-6.61872	7.13476e-07
LM62 - SF1	19	-0.13986	1.04954	54.6267	-0.133258	0.999144	19	-1.51049	2.10575	31.3778	-0.717317	0.889463	13	-1.67832	0.941992	19.5198	-1.78167	0.311435	13	-0.979021	1.52235	23.7229	-0.643098	0.916899
NS3 - SF1	19	0.993007	1.22891	34.3354	0.808037	0.85021	19	-0.643357	2.62179	21.4708	-0.245388	0.994649	13	3.34266	0.822206	20.3579	4.06547	0.00302975	13	7.32867	1.42551	22.5147	5.1411	0.000192478
LM19 - LM62													14	1.25874	0.93507	19.7215	1.34615	0.545952	14	-0.573427	1.68052	20.7779	-0.341219	0.985937
LM19 - NS3													14	-2.05594	0.80343	22.4259	-2.55896	0.0775559	14	-1.87413	1.61936	19.1224	-1.15732	0.659801
LM19 - SF1													14	0.881119	0.903078	20.7871	0.975684	0.764556	14	-0.881119	1.83826	21.1657	-0.479323	0.962843
LM62 - NS3													14	-3.31469	0.84872	18.4612	-3.90551	0.00502339	14	-1.3007	1.25002	35.7076	-1.04055	0.72702
LM62 - SF1													14	-0.377622	0.943597	19.0711	-0.400194	0.977676	14	-0.307692	1.52295	22.6388	-0.202037	0.996993
NS3 - SF1													14	2.93706	0.813339	19.816	3.61112	0.008783	14	0.993007	1.45518	21.7599	0.682392	0.902668
LM19 - LM62													15	3.28671	0.946593	19.1855	3.47215	0.012349	15	-0.195804	1.69216	19.9814	-0.115713	0.999426
LM19 - NS3													15	-0.993007	0.806009	21.4497	-1.232	0.614042	15	-1.44056	1.65688	18.744	-0.869443	0.820398
LM19 - SF1													15	0.769231	0.907194	20.3461	0.847923	0.831004	15	-0.685315	1.87533	20.608	-0.365437	0.982846
LM62 - NS3													15	-4.27972	0.848878	17.6446	-5.04162	0.000477062	15	-1.24476	1.24665	36.0553	-0.998477	0.751207
LM62 - SF1													15	-2.51748	0.945486	18.5511	-2.66263	0.0679907	15	-0.48951	1.52505	21.4948	-0.32098	0.988239
NS3 - SF1													15	1.76224	0.804709	19.1394	2.18991	0.161677	15	0.755245	1.4858	20.9973	0.508307	0.956201

## Sheet: Table S3
Table S3. Pairwise comparisons test using mixed models for determining the significant differences between the means of four wheat genotypes for plant biomass. S3.1 Relative growth rate (RGR) in Figure 3A. S3.2 Growth models for plant volume in Figure 3B under different treatments in different time points. The p-values below 0.05 are highlighted in green.
Table S3.1. Analysis of relative growth rate (RGR) of four wheat genotypes under different treatments in different time points.																										Table S3.2. Analysis of growth models for plant volume of four wheat genotypes under different treatments in different time points.
Treatments	Control						Drought						Heat						Combined							Treatments	Control						Drought						Heat						Combined
contrast	Days.after.inducing.stress	estimate	SE	df	t.ratio	p.value	Days.after.inducing.stress	estimate	SE	df	t.ratio	p.value	Days.after.inducing.stress	estimate	SE	df	t.ratio	p.value	Days.after.inducing.stress	estimate	SE	df	t.ratio	p.value		contrast	Days.of.inducing.stress	estimate	SE	df	t.ratio	p.value	Days.after.inducing.stress	estimate	SE	df	t.ratio	p.value	Days.of.inducing.stress	estimate	SE	df	t.ratio	p.value	Days.of.inducing.stress	estimate	SE	df	t.ratio
LM19 - LM62	3	0.0261582	0.0299703	154.388	0.872805	0.818911	3	-0.0440674	0.027694	71.9955	-1.59122	0.390043	3	0.0163028	0.0273621	68.1416	0.595819	0.933002	3	-0.0213852	0.0315592	48.4506	-0.677623	0.905078		LM19 - LM62	3	0.0800181	0.333031	30.4142	0.240272	0.995016	3	-0.211306	0.319456	33.6886	-0.661456	0.910751	3	0.0551886	0.137254	23.6281	0.40209	0.977493	3	-0.0906371	0.106107	14.3613	-0.854204
LM19 - NS3	3	-0.0266706	0.0299703	154.388	-0.889901	0.810111	3	-0.0461094	0.0272325	76.4363	-1.69318	0.334339	3	-0.0546966	0.0295037	64.8711	-1.85389	0.258079	3	-0.106907	0.0301278	66.2419	-3.54844	0.00391407		LM19 - NS3	3	-0.0954331	0.330172	30.8008	-0.28904	0.991416	3	-0.267815	0.331226	33.5831	-0.808557	0.849958	3	-0.095041	0.124021	21.865	-0.766328	0.86867	3	-0.502976	0.160272	8.77569	-3.13827
LM19 - SF1	3	0.00697079	0.0299703	154.388	0.23259	0.995551	3	0.000204459	0.0271887	76.6801	0.00752002	1	3	-0.0840378	0.0273619	68.1453	-3.07135	0.0158246	3	-0.0704145	0.0300948	66.5296	-2.33976	0.0993629		LM19 - SF1	3	-0.148451	0.345322	29.8722	-0.429891	0.97288	3	0.017279	0.477509	32.3027	0.0361858	0.999983	3	-0.454164	0.135914	22.8332	-3.34155	0.0140848	3	-0.208775	0.0904366	20.5441	-2.30852
LM62 - NS3	3	-0.0528288	0.0299703	154.388	-1.76271	0.29534	3	-0.00204207	0.0277115	71.9813	-0.0736903	0.999855	3	-0.0709994	0.029504	64.8681	-2.40644	0.0858951	3	-0.0855216	0.0315049	48.6286	-2.71454	0.04388		LM62 - NS3	3	-0.175451	0.288821	37.2248	-0.607473	0.929065	3	-0.0565092	0.329471	33.7494	-0.171515	0.99817	3	-0.15023	0.113563	31.5553	-1.32287	0.555668	3	-0.412339	0.176573	11.704	-2.33523
LM62 - SF1	3	-0.0191874	0.0299703	154.388	-0.640215	0.9188	3	0.0442718	0.0276684	72.1868	1.60008	0.385056	3	-0.100341	0.0273621	68.1408	-3.66714	0.00265957	3	-0.0490293	0.0314734	48.7113	-1.5578	0.411876		LM62 - SF1	3	-0.228469	0.306025	31.559	-0.746569	0.877427	3	0.228585	0.476293	34.7696	0.479926	0.963034	3	-0.509352	0.126443	27.2297	-4.0283	0.00216577	3	-0.118137	0.116917	16.8531	-1.01044
NS3 - SF1	3	0.0336414	0.0299703	154.388	1.12249	0.676241	3	0.0463139	0.0272065	76.6646	1.70231	0.329576	3	-0.0293413	0.0295037	64.8706	-0.994494	0.753062	3	0.0364923	0.0300379	67.1322	1.21487	0.619673		NS3 - SF1	3	-0.0530177	0.302911	31.4861	-0.175027	0.998053	3	0.285095	0.484266	31.5377	0.588715	0.934753	3	-0.359123	0.111939	25.9826	-3.20819	0.0174263	3	0.294201	0.167625	10.1956	1.75512
LM19 - LM62	6	0.0206578	0.0299703	154.388	0.689274	0.901066	6	0.0209515	0.0272126	127.778	0.769922	0.867876	5	0.00215576	0.0273621	107.743	0.0787865	0.999824	5	-0.014573	0.0312866	75.44	-0.465792	0.966287		LM19 - LM62	6	0.406458	0.324545	55.1841	1.25239	0.596686	6	-0.528375	0.464872	29.6162	-1.1366	0.670296	5	0.0911258	0.170822	23.1347	0.533454	0.95001	5	-0.197043	0.138517	18.1084	-1.42251
LM19 - NS3	6	-0.0395678	0.0299703	154.388	-1.32023	0.55149	6	-0.00185152	0.0268713	136.222	-0.0689032	0.999882	5	-0.0572715	0.0273619	104.742	-2.09311	0.162086	5	-0.0366859	0.0300082	105.679	-1.22253	0.614004		LM19 - NS3	6	-0.498659	0.335415	49.4239	-1.48669	0.453088	6	-0.452511	0.354663	49.6183	-1.27589	0.582358	5	-0.296051	0.181283	24.2108	-1.63308	0.379726	5	-0.621821	0.188127	10.8597	-3.30532
LM19 - SF1	6	-0.0117356	0.0299703	154.388	-0.391574	0.979556	6	0.0185713	0.026843	136.655	0.69185	0.900061	5	-0.0547905	0.0273619	107.748	-2.00244	0.193489	5	-0.0612054	0.0299846	106.073	-2.04123	0.179593		LM19 - SF1	6	-0.307233	0.412536	29.3847	-0.744743	0.878145	6	0.195253	0.354641	52.3021	0.550567	0.945988	5	-0.775973	0.181573	25.0559	-4.27362	0.00130938	5	-0.542744	0.119298	25.1691	-4.5495
LM62 - NS3	6	-0.0602256	0.0299703	154.388	-2.00951	0.188941	6	-0.0228031	0.0272241	127.711	-0.837607	0.836444	5	-0.0594272	0.0273621	104.736	-2.17188	0.137891	5	-0.0221128	0.0312449	75.6985	-0.707727	0.893738		LM62 - NS3	6	-0.905117	0.349474	45.4919	-2.58995	0.0598022	6	0.075864	0.45557	29.3942	0.166525	0.998319	5	-0.387177	0.124281	42.0918	-3.11534	0.0167564	5	-0.424778	0.203886	13.2541	-2.08341
LM62 - SF1	6	-0.0323934	0.0299703	154.388	-1.08085	0.701734	6	-0.00238024	0.0271961	128.098	-0.0875213	0.999759	5	-0.0569463	0.0273621	107.742	-2.08121	0.165815	5	-0.0466324	0.0312222	75.8167	-1.49356	0.446401		LM62 - SF1	6	-0.713691	0.424045	29.4436	-1.68306	0.350314	6	0.723628	0.455553	28.8279	1.58846	0.400768	5	-0.867099	0.124703	33.3833	-6.95333	3.31085e-07	5	-0.345701	0.142862	18.3374	-2.41982
NS3 - SF1	6	0.0278322	0.0299703	154.388	0.92866	0.789532	6	0.0204228	0.0268546	136.586	0.760496	0.872011	5	0.00248095	0.0273619	104.741	0.0906718	0.999731	5	-0.0245195	0.0299411	106.928	-0.818926	0.845406		NS3 - SF1	6	0.191426	0.432421	29.6044	0.442685	0.970515	6	0.647764	0.342357	59.7353	1.89207	0.242381	5	-0.479922	0.138687	33.4787	-3.46046	0.00774882	5	0.0790774	0.191349	11.4145	0.413263
LM19 - LM62	8	-0.0296453	0.0299703	154.388	-0.989156	0.755833	8	0.0199434	0.0269737	166.855	0.739365	0.881053	6	0.0319102	0.0273621	124.545	1.16622	0.649212	6	-0.0156679	0.0311611	90.0178	-0.502803	0.958213		LM19 - LM62	8	0.308975	0.41897	39.5537	0.737464	0.881388	8	-0.379967	0.650012	27.8062	-0.584554	0.935904	6	0.222893	0.198859	23.5972	1.12086	0.680584	6	-0.155745	0.160865	19.4413	-0.968174
LM19 - NS3	8	-0.0165624	0.0299703	154.388	-0.552626	0.945715	8	-0.035872	0.0267154	174.937	-1.34275	0.537048	6	-0.046297	0.0273619	121.913	-1.69203	0.332315	6	-0.0754066	0.0299604	123.272	-2.51688	0.0622337		LM19 - NS3	8	-0.698409	0.434461	37.0168	-1.60753	0.386958	8	-1.1233	0.5166	34.3779	-2.17441	0.150721	6	-0.24332	0.21633	24.7823	-1.12476	0.678064	6	-0.777156	0.207293	12.1451	-3.74906
LM19 - SF1	8	-0.018606	0.0299703	154.388	-0.620815	0.925289	8	0.016753	0.0266977	175.27	0.627505	0.923105	6	-0.0295597	0.0273619	124.55	-1.08032	0.702162	6	-0.0721843	0.0299415	123.618	-2.41085	0.0803001		LM19 - SF1	8	-0.711386	0.527325	27.7118	-1.34905	0.540707	8	0.251014	0.433567	37.0227	0.57895	0.937777	6	-0.830836	0.213098	24.9892	-3.89885	0.00337061	6	-0.676562	0.141367	24.9028	-4.78585
LM62 - NS3	8	0.0130829	0.0299703	154.388	0.43653	0.97207	8	-0.0558154	0.026981	166.79	-2.06869	0.1677	6	-0.0782072	0.0273621	121.908	-2.85823	0.0254791	6	-0.0597387	0.0311258	90.2665	-1.91927	0.227311		LM62 - NS3	8	-1.00738	0.471028	34.6794	-2.13869	0.161116	8	-0.743334	0.635542	27.7866	-1.16961	0.650515	6	-0.466213	0.148034	35.9308	-3.14936	0.0165742	6	-0.621411	0.222467	14.084	-2.79327
LM62 - SF1	8	0.0110393	0.0299703	154.388	0.368342	0.98287	8	-0.00319042	0.0269635	167.112	-0.118323	0.999406	6	-0.0614698	0.0273621	124.544	-2.24653	0.116541	6	-0.0565165	0.0311076	90.3766	-1.8168	0.272219		LM62 - SF1	8	-1.02036	0.557837	27.9613	-1.82914	0.281377	8	0.630981	0.570104	26.1648	1.10678	0.688618	6	-1.05373	0.143269	29.2562	-7.35489	2.32556e-07	6	-0.520817	0.162806	18.8687	-3.19901
NS3 - SF1	8	-0.00204363	0.0299703	154.388	-0.0681887	0.999886	8	0.052625	0.0267052	175.208	1.97059	0.203121	6	0.0167374	0.0273619	121.912	0.611703	0.928189	6	0.00322227	0.0299048	124.398	0.107751	0.99955		NS3 - SF1	8	-0.0129773	0.569564	27.9757	-0.0227846	0.999996	8	1.37431	0.411556	41.1332	3.33931	0.0093374	6	-0.587517	0.166673	30.3124	-3.52496	0.00709551	6	0.100594	0.208803	12.3203	0.481765
LM19 - LM62	10	0.0196045	0.0299703	154.388	0.65413	0.913962	10	-0.0256447	0.0268026	193.13	-0.956797	0.774061	7	-0.040208	0.027362	136.277	-1.46948	0.458745	7	0.0123928	0.0310429	103.349	0.399216	0.978346		LM19 - LM62	10	0.565287	0.552162	31.6768	1.02377	0.736906	10	-0.363495	0.856285	26.5868	-0.424503	0.973782	7	0.103964	0.231024	23.9556	0.450013	0.968985	7	-0.189828	0.185433	20.4016	-1.0237
LM19 - NS3	10	-0.0204408	0.0299703	154.388	-0.682036	0.903801	10	-0.0859872	0.0266291	198.17	-3.22907	0.00786836	7	-0.0556518	0.0273619	134.356	-2.03392	0.1808	7	-0.0928246	0.0299206	136.061	-3.10236	0.0123588		LM19 - NS3	10	-1.57441	0.569342	30.7065	-2.76531	0.0447016	10	-2.309	0.715727	29.2482	-3.22608	0.0154308	7	-0.545551	0.25337	24.9384	-2.15318	0.164325	7	-1.0425	0.228837	13.4297	-4.55566
LM19 - SF1	10	0.0438485	0.0299703	154.388	1.46306	0.462337	10	-0.0920166	0.0266221	198.286	-3.45639	0.00371394	7	-0.028346	0.0273619	136.281	-1.03597	0.728655	7	-0.0326816	0.0299065	136.308	-1.09279	0.694539		LM19 - SF1	10	-0.335409	0.667156	26.538	-0.502744	0.957712	10	-0.596485	0.595391	30.7019	-1.00184	0.74947	7	-1.11195	0.247619	24.7942	-4.49058	0.000769769	7	-0.741278	0.165997	24.5237	-4.46562
LM62 - NS3	10	-0.0400453	0.0299703	154.388	-1.33617	0.541402	10	-0.0603425	0.0268057	193.1	-2.25111	0.113403	7	-0.0154438	0.0273621	134.352	-0.564425	0.942423	7	-0.105217	0.0310141	103.551	-3.39257	0.00534731		LM62 - NS3	10	-2.1397	0.617045	29.829	-3.46765	0.00832631	10	-1.9455	0.839394	26.6186	-2.31775	0.119299	7	-0.649516	0.178452	31.6483	-3.63971	0.00506358	7	-0.852676	0.243374	14.9086	-3.50356
LM62 - SF1	10	0.024244	0.0299703	154.388	0.808934	0.850165	10	-0.0663719	0.0267989	193.225	-2.47667	0.066811	7	0.011862	0.0273621	136.276	0.433519	0.972604	7	-0.0450744	0.0310004	103.635	-1.45399	0.468982		LM62 - SF1	10	-0.900696	0.708302	26.7378	-1.27163	0.588295	10	-0.232989	0.739464	25.7871	-0.315079	0.98891	7	-1.21592	0.170188	26.9067	-7.14455	6.53316e-07	7	-0.55145	0.185524	19.4268	-2.97239
NS3 - SF1	10	0.0642893	0.0299703	154.388	2.1451	0.143624	10	-0.00602941	0.0266253	198.261	-0.226454	0.995894	7	0.0273058	0.0273619	134.355	0.99795	0.750823	7	0.060143	0.0298766	136.902	2.01305	0.188219		NS3 - SF1	10	1.239	0.721775	26.7061	1.7166	0.335207	10	1.71251	0.570831	32.1977	3.00003	0.0253275	7	-0.566403	0.19947	28.0962	-2.83954	0.039147	7	0.301226	0.228912	13.307	1.31591
LM19 - LM62	13	-0.00665709	0.0299703	154.388	-0.222123	0.996118	13	-0.0441427	0.0266758	204.512	-1.65479	0.350474	8	0.00890397	0.027362	142.948	0.325413	0.98805	8	0.0711835	0.0309322	113.973	2.30128	0.103763		LM19 - LM62	13	0.773988	0.780893	26.8505	0.991158	0.755646	13	-1.30087	1.18104	25.3785	-1.10146	0.691882	8	0.158435	0.265824	24.0876	0.596016	0.932293	8	-0.177604	0.211449	21.0455	-0.83994
LM19 - NS3	13	-0.0431509	0.0299703	154.388	-1.43979	0.476603	13	-0.0811788	0.0266311	205.552	-3.04827	0.0137684	8	-0.0539411	0.0273619	141.763	-1.9714	0.20373	8	-0.0551874	0.029889	143.644	-1.84641	0.256095		LM19 - NS3	13	-3.69686	0.798831	26.561	-4.62784	0.000471247	13	-4.63478	1.03726	26.248	-4.46828	0.000731733	8	-0.811359	0.291645	24.8513	-2.78201	0.0468467	8	-1.42407	0.252151	14.6263	-5.64769
LM19 - SF1	13	-0.0224207	0.0299703	154.388	-0.748096	0.877358	13	-0.0704239	0.0266404	205.363	-2.6435	0.0434969	8	-0.0338769	0.0273619	142.951	-1.23811	0.603736	8	0.00954274	0.0298796	143.788	0.319373	0.988687		LM19 - SF1	13	-0.824748	0.898069	25.1343	-0.918357	0.795315	13	-2.23793	0.894324	26.6709	-2.50237	0.082478	8	-1.48821	0.284047	24.5467	-5.2393	0.000118115	8	-0.836282	0.192204	24.1628	-4.351
LM62 - NS3	13	-0.0364938	0.0299703	154.388	-1.21767	0.616604	13	-0.0370361	0.0266725	204.544	-1.38855	0.50796	8	-0.062845	0.027362	141.759	-2.2968	0.103612	8	-0.126371	0.0309098	114.11	-4.08837	0.000466267		LM62 - NS3	13	-4.47085	0.85437	26.4183	-5.23292	9.73437e-05	13	-3.33391	1.16239	25.4021	-2.86815	0.03842	8	-0.969794	0.212695	28.9654	-4.55956	0.000476878	8	-1.24647	0.26606	15.6922	-4.68491
LM62 - SF1	13	-0.0157636	0.0299703	154.388	-0.525973	0.952693	13	-0.0262811	0.0266818	204.361	-0.984984	0.758169	8	-0.0427809	0.0273621	142.948	-1.56351	0.402763	8	-0.0616407	0.0309007	114.162	-1.9948	0.195994		LM62 - SF1	13	-1.59874	0.947811	25.3044	-1.68677	0.351174	13	-0.937063	1.03685	25.0819	-0.903763	0.802947	8	-1.64664	0.20215	25.6334	-8.14564	8.13887e-08	8	-0.658677	0.21012	19.9318	-3.13477
NS3 - SF1	13	0.0207303	0.0299703	154.388	0.691694	0.900143	13	0.0107549	0.0266371	205.396	0.403757	0.97769	8	0.0200642	0.0273619	141.762	0.733289	0.883557	8	0.0647301	0.0298565	144.177	2.16804	0.137167		NS3 - SF1	13	2.87211	0.962644	25.2815	2.98357	0.0297554	13	2.39684	0.869548	27.0618	2.75642	0.0478295	8	-0.676846	0.235073	26.649	-2.8793	0.0366474	8	0.587788	0.251037	14.2918	2.34144
LM19 - LM62	15	-0.00755841	0.0299703	154.388	-0.252197	0.994349	15	-0.0834221	0.0266788	196.814	-3.12691	0.0108681	10	-0.00163342	0.027362	145.616	-0.0596965	0.999923	10	0.0758098	0.0307332	123.558	2.4667	0.0703024		LM19 - LM62	15	0.702442	0.941803	25.3005	0.745848	0.877561	15	-2.32749	1.40225	24.8423	-1.65983	0.365299	10	0.0998705	0.340044	23.9015	0.293699	0.990952	9	-0.0116317	0.238439	21.4511	-0.0487826
LM19 - NS3	15	-0.0666974	0.0299703	154.388	-2.22545	0.120939	15	-0.123042	0.0267201	195.945	-4.60485	4.3689e-05	10	-0.0116513	0.0372715	140.341	-0.312607	0.989372	10	-0.0434443	0.0298501	147.079	-1.45542	0.467121		LM19 - NS3	15	-7.00986	0.959884	25.16	-7.30282	6.59289e-07	15	-7.5138	1.25779	25.278	-5.97379	1.67343e-05	10	-1.37243	0.370359	24.3981	-3.70567	0.0055792	9	-1.77995	0.276787	15.6864	-6.43074
LM19 - SF1	15	-0.0599424	0.0299703	154.388	-2.00006	0.192442	15	-0.107413	0.0267402	195.454	-4.01692	0.000484841	10	0.0190906	0.0273619	145.618	0.69771	0.897818	10	0.0183715	0.0298502	147.078	0.615456	0.92702		LM19 - SF1	15	-2.6461	1.05896	24.4306	-2.49876	0.0851923	15	-3.50556	1.10773	25.4036	-3.16462	0.0195913	10	-1.69173	0.360284	24.0193	-4.69553	0.000490225	9	-0.781293	0.219426	23.831	-3.56063
LM62 - NS3	15	-0.059139	0.0299703	154.388	-1.97325	0.202621	15	-0.0396201	0.0266712	196.904	-1.4855	0.448189	10	-0.0100179	0.0372716	140.341	-0.268782	0.993179	10	-0.119254	0.030724	123.613	-3.88146	0.000955417		LM62 - NS3	15	-7.7123	1.01817	25.1858	-7.57464	3.45328e-07	15	-5.18631	1.38295	24.8551	-3.75017	0.00490017	10	-1.4723	0.287079	25.9866	-5.12854	0.000133837	9	-1.76831	0.290107	16.4093	-6.09538
LM62 - SF1	15	-0.052384	0.0299703	154.388	-1.74786	0.302713	15	-0.0239911	0.0266913	196.425	-0.898838	0.805441	10	0.0207241	0.027362	145.616	0.757402	0.873362	10	-0.0574383	0.0307242	123.612	-1.86948	0.24655		LM62 - SF1	15	-3.34854	1.11207	24.6009	-3.01108	0.0283931	15	-1.17807	1.24803	24.6177	-0.943938	0.781694	10	-1.7916	0.273959	24.197	-6.53965	5.02868e-06	9	-0.769661	0.236006	20.3405	-3.26119
NS3 - SF1	15	0.00675498	0.0299703	154.388	0.225389	0.995947	15	0.0156289	0.0267326	195.549	0.584639	0.936622	10	0.030742	0.0372715	140.341	0.824812	0.842634	10	0.0618158	0.0298407	147.213	2.07153	0.167308		NS3 - SF1	15	4.36376	1.12743	24.5909	3.87055	0.00369018	15	4.00824	1.0832	25.5875	3.70036	0.00536416	10	-0.319302	0.310788	24.9122	-1.02739	0.735216	9	0.998653	0.274694	15.216	3.63552
LM19 - LM62	16	0.00528003	0.0299703	154.388	0.176175	0.99805	16	-0.061571	0.0267065	187.341	-2.30547	0.100433	11	0.0681778	0.027362	142.522	2.4917	0.065496	11	0.0706957	0.0306452	121.574	2.30691	0.102087		LM19 - LM62													11	0.237485	0.37856	23.7119	0.627338	0.922238	11	0.0543528	0.294264	21.8173	0.184708
LM19 - NS3	16	0.0399227	0.0299703	154.388	1.33208	0.54399	16	-0.0169722	0.0267908	185.466	-0.63351	0.921105	11	-0.0147363	0.0273619	141.913	-0.538571	0.949453	11	-0.0190771	0.0298428	143.897	-0.639252	0.919117		LM19 - NS3													11	-1.46681	0.410382	24.1408	-3.57425	0.00774958	11	-1.91882	0.328824	17.3498	-5.8354
LM19 - SF1	16	0.0371923	0.0299703	154.388	1.24097	0.601828	16	-0.12449	0.0268162	184.798	-4.64233	3.84155e-05	11	0.0131101	0.0273619	142.525	0.479139	0.963594	11	0.0676079	0.0298477	143.831	2.26509	0.111155		LM19 - SF1													11	-1.73821	0.399449	23.7702	-4.35152	0.00118	11	-0.512645	0.2757	23.2545	-1.85944
LM62 - NS3	16	0.0346427	0.0299703	154.388	1.1559	0.655482	16	0.0445988	0.0266968	187.466	1.67057	0.342178	11	-0.0829141	0.027362	141.911	-3.03027	0.0152267	11	-0.0897728	0.0306426	121.619	-2.92967	0.0208565		LM62 - NS3													11	-1.70429	0.325877	25.103	-5.22987	0.000113438	11	-1.97317	0.341121	17.5999	-5.78439
LM62 - SF1	16	0.0319123	0.0299703	154.388	1.0648	0.711424	16	-0.0629186	0.0267223	186.807	-2.35454	0.0896906	11	-0.0550676	0.027362	142.522	-2.01256	0.188182	11	-0.0030878	0.0306474	121.596	-0.100752	0.999632		LM62 - SF1													11	-1.9757	0.311997	23.7186	-6.33243	9.06347e-06	11	-0.566998	0.290255	20.867	-1.95345
NS3 - SF1	16	-0.00273037	0.0299703	154.388	-0.0911026	0.999728	16	-0.107517	0.0268065	184.93	-4.01088	0.00050551	11	0.0278465	0.0273619	141.913	1.01771	0.739359	11	0.086685	0.0298451	143.901	2.9045	0.0219014		NS3 - SF1													11	-0.271404	0.349926	24.3488	-0.775604	0.864695	11	1.40618	0.325242	16.7706	4.32348
LM19 - LM62	17	0.0167807	0.0299703	154.388	0.559912	0.94371	17	-0.0149293	0.0267518	173.472	-0.558066	0.944239	12	-0.0779505	0.027362	135.433	-2.84886	0.0258178	12	0.0724988	0.0305649	114.691	2.37197	0.0883464
LM19 - NS3	17	0.0573993	0.0299703	154.388	1.91521	0.225927	17	0.0725371	0.0268786	170.658	2.69869	0.0380383	12	-0.094462	0.0273619	134.514	-3.45232	0.00409211	12	-0.0195764	0.0298437	136.484	-0.655964	0.91329
LM19 - SF1	17	0.0244935	0.0299703	154.388	0.817259	0.846243	17	0.107417	0.0269093	169.848	3.99182	0.000560177	12	-0.00958872	0.0273619	135.436	-0.350441	0.985167	12	0.06005	0.0298534	136.339	2.0115	0.18881
LM62 - NS3	17	0.0406186	0.0299703	154.388	1.3553	0.52932	17	0.0874664	0.0267399	173.625	3.271	0.00701792	12	-0.0165114	0.027362	134.511	-0.603445	0.930821	12	-0.0920752	0.0305689	114.729	-3.01205	0.0166201
LM62 - SF1	17	0.00771278	0.0299703	154.388	0.257347	0.994002	17	0.122346	0.0267708	172.811	4.57015	5.43755e-05	12	0.0683618	0.027362	135.432	2.49842	0.0646785	12	-0.0124488	0.0305784	114.678	-0.407112	0.977103
NS3 - SF1	17	-0.0329058	0.0299703	154.388	-1.09795	0.691323	17	0.0348801	0.0268975	170.006	1.29678	0.566246	12	0.0848732	0.0273619	134.514	3.10188	0.012393	12	0.0796264	0.0298576	136.347	2.66687	0.0421717
LM19 - LM62	18	-0.0382551	0.0299703	154.388	-1.27643	0.579302	18	-0.0609599	0.0268144	155.575	-2.2734	0.108756	13	0.00307825	0.027362	123.212	0.112501	0.999488	13	-0.136966	0.0304923	103.153	-4.49182	0.000107692
LM19 - NS3	18	-0.0639407	0.0299703	154.388	-2.13347	0.147159	18	-0.0779744	0.0269836	152.105	-2.8897	0.0226938	13	-0.0614458	0.0273619	121.979	-2.24567	0.116898	13	0.0173944	0.0298527	123.793	0.582673	0.937133
LM19 - SF1	18	-0.0239205	0.0299703	154.388	-0.798141	0.85518	18	0.00708522	0.0270194	151.23	0.262227	0.99366	13	0.0455584	0.0273619	123.215	1.66503	0.34662	13	-0.0700037	0.0298672	123.57	-2.34383	0.0938069
LM62 - NS3	18	-0.0256856	0.0299703	154.388	-0.857035	0.826871	18	-0.0170145	0.0268004	155.74	-0.63486	0.920622	13	-0.064524	0.027362	121.975	-2.35817	0.0908436	13	0.15436	0.0305031	103.177	5.06049	1.08106e-05
LM62 - SF1	18	0.0143345	0.0299703	154.388	0.478291	0.963785	18	0.0680451	0.0268366	154.843	2.53554	0.0584491	13	0.0424801	0.027362	123.212	1.55252	0.409632	13	0.0669623	0.0305173	103.094	2.19424	0.131675
NS3 - SF1	18	0.0400201	0.0299703	154.388	1.33533	0.541933	18	0.0850596	0.0270056	151.396	3.14971	0.0105118	13	0.107004	0.0273619	121.978	3.9107	0.000864665	13	-0.0873981	0.0298782	123.506	-2.92514	0.0210787
LM19 - LM62	19	0.0287965	0.0299703	154.388	0.960836	0.771833	19	-0.047173	0.0268943	135.007	-1.75402	0.300188	14	-0.0140882	0.027362	106.021	-0.514883	0.95537	14	-0.0637695	0.0304276	88.1656	-2.09578	0.1625
LM19 - NS3	19	-0.0320494	0.0299703	154.388	-1.06937	0.708671	19	-0.104604	0.0271053	131.336	-3.85916	0.00100984	14	-0.0407072	0.0273619	104.658	-1.48773	0.448513	14	-0.16899	0.0298699	106.144	-5.65754	7.8206e-07
LM19 - SF1	19	-0.0345875	0.0299703	154.388	-1.15406	0.656633	19	-0.0188306	0.0271464	130.491	-0.693669	0.899354	14	0.013939	0.0273619	106.024	0.50943	0.956682	14	-0.00114245	0.0298892	105.875	-0.0382229	0.99998
LM62 - NS3	19	-0.060846	0.0299703	154.388	-2.03021	0.181431	19	-0.0574307	0.0268782	135.163	-2.1367	0.146826	14	-0.026619	0.0273619	104.654	-0.972847	0.765166	14	-0.105221	0.0304451	88.169	-3.45609	0.00461287
LM62 - SF1	19	-0.063384	0.0299703	154.388	-2.11489	0.152937	19	0.0283424	0.0269196	134.279	1.05285	0.718636	14	0.0280272	0.027362	106.02	1.02431	0.735606	14	0.062627	0.030464	88.0676	2.05577	0.175882
NS3 - SF1	19	-0.00253802	0.0299703	154.388	-0.0846844	0.999781	19	0.0857732	0.0271304	130.645	3.16151	0.0104018	14	0.0546462	0.0273619	104.657	1.99716	0.195637	14	0.167848	0.029907	105.75	5.61233	9.62828e-07
LM19 - LM62													15	-0.0729736	0.027362	86.0422	-2.66697	0.0444246	15	-0.0448897	0.0303707	71.8046	-1.47806	0.455945
LM19 - NS3													15	-0.100935	0.0273619	84.7966	-3.68889	0.00220501	15	-0.172024	0.0298953	85.8819	-5.75424	7.80835e-07
LM19 - SF1													15	0.00657326	0.0273619	86.0447	0.240234	0.995088	15	0.00289494	0.0299193	85.6226	0.0967585	0.999673
LM62 - NS3													15	-0.0279614	0.0273619	84.7937	-1.02191	0.737112	15	-0.127135	0.030395	71.7949	-4.18276	0.000458471
LM62 - SF1													15	0.0795469	0.027362	86.0417	2.9072	0.0235606	15	0.0477846	0.0304186	71.6949	1.5709	0.401579
NS3 - SF1													15	0.107508	0.0273619	84.7961	3.92912	0.000978664	15	0.174919	0.0299439	85.4757	5.84158	5.4352e-07
[truncated: 1 more columns]

## Sheet: Table S4
Table S4. Pairwise comparisons test using mixed models determining the significant differences between the means of four wheat genotypes for Chlorophyll fluorescence measurements on light-adapted plants at PPFD of 750 µmol m-2 s-1. S4.1 PSII operating efficiency (Fq'/Fm'). S4.2 Fraction of open PSII centers (oxidized QA) in steady state (qL) under different treatments in different time points. Th…
Table S4.1. Analysis of PSII operating efficiency (Fq'/Fm') of four wheat genotypes under different treatments in different time points.																										Table S4.2. Analysis of fraction of open PSII centers (oxidized QA) in steady state (qL) of four wheat genotypes under different treatments in different time points.
Treatments	Control						Drought						Heat						Combined							Treatments	Control						Drought						Heat						Combined
contrast	Days.after.inducing.stress	estimate	SE	df	t.ratio	p.value	Days.after.inducing.stress	estimate	SE	df	t.ratio	p.value	Days.after.inducing.stress	estimate	SE	df	t.ratio	p.value	Days.after.inducing.stress	estimate	SE	df	t.ratio	p.value		contrast	Days.after.inducing.stress	estimate	SE	df	t.ratio	p.value	Days.after.inducing.stress	estimate	SE	df	t.ratio	p.value	Days.after.inducing.stress	estimate	SE	df	t.ratio	p.value	Days.after.inducing.stress	estimate	SE	df	t.ratio
LM19 - LM62	1	-0.0266776	0.00706215	56.8197	-3.77754	0.00210491	1	-0.0082735	0.00844059	42.2525	-0.980204	0.761391	1	-0.0115246	0.00431638	39.5006	-2.66998	0.0513976	1	-0.0195837	0.0071278	40.7696	-2.7475	0.0424773		LM19 - LM62	1	-0.0335356	0.0187707	72.8283	-1.78659	0.288049	1	-0.016244	0.0239665	29.4696	-0.677776	0.904684	1	-0.0346061	0.0152374	25.5008	-2.27113	0.131578	1	-0.0676257	0.0183802	36.3467	-3.67928
LM19 - NS3	1	-0.0307119	0.00819145	44.1693	-3.74927	0.00278536	1	0.00490818	0.00730611	66.4232	0.671791	0.907375	1	-0.0149774	0.004199	40.1657	-3.56691	0.00506472	1	-0.0311599	0.0078964	45.8102	-3.94609	0.00149595		LM19 - NS3	1	-0.063909	0.0214974	57.5465	-2.97287	0.0217513	1	0.00518588	0.0214399	57.1148	0.24188	0.994968	1	-0.0763369	0.0154602	24.532	-4.93764	0.000253643	1	-0.1368	0.0200474	28.8074	-6.82384
LM19 - SF1	1	-0.00987156	0.00726661	57.6044	-1.35848	0.530186	1	-0.00129262	0.00818122	43.027	-0.157999	0.998573	1	-0.0162285	0.00460514	43.1848	-3.524	0.00542712	1	-0.0189672	0.00671228	50.8868	-2.82574	0.0329668		LM19 - SF1	1	-0.0426745	0.0206081	69.6352	-2.07077	0.172879	1	-0.0445539	0.026831	36.8309	-1.66054	0.358617	1	-0.0946568	0.0142012	29.9015	-6.66541	1.30287e-06	1	-0.0798178	0.0211666	35.7159	-3.77094
LM62 - NS3	1	-0.00403436	0.00790612	45.3882	-0.510283	0.956226	1	0.0131817	0.008717	41.5889	1.51218	0.439549	1	-0.00345279	0.00468724	34.6057	-0.736636	0.881649	1	-0.0115763	0.00795429	44.5619	-1.45535	0.472527		LM62 - NS3	1	-0.0303734	0.0216426	57.8167	-1.40341	0.502404	1	0.0214298	0.0249033	31.4645	0.860523	0.824935	1	-0.0417309	0.0153881	24.8704	-2.71189	0.0544379	1	-0.0691742	0.0209478	27.941	-3.30222
LM62 - SF1	1	0.016806	0.00694338	60.2047	2.42044	0.0840157	1	0.00698088	0.00946252	37.0843	0.73774	0.881234	1	-0.00470388	0.0050543	34.7937	-0.930668	0.78867	1	0.00061649	0.0067803	47.9975	0.0909238	0.999727		LM62 - SF1	1	-0.00913892	0.0207595	69.1348	-0.440229	0.971267	1	-0.02831	0.0296717	32.3366	-0.954108	0.77601	1	-0.0600507	0.0141227	30.8211	-4.25208	0.000996772	1	-0.0121922	0.0220212	33.7829	-0.553655
NS3 - SF1	1	0.0208404	0.00808928	44.3556	2.5763	0.0620388	1	-0.0062008	0.00846611	42.5385	-0.732427	0.883516	1	-0.00125109	0.00495444	35.5906	-0.252519	0.994246	1	0.0121927	0.0075842	48.433	1.60765	0.383987		NS3 - SF1	1	0.0212345	0.0232541	49.9219	0.913151	0.797933	1	-0.0497398	0.027671	35.9933	-1.79755	0.291116	1	-0.0183199	0.0143628	28.8785	-1.27551	0.585389	1	0.056982	0.0234308	30.2363	2.43193
LM19 - LM62	3	-0.0178521	0.0068913	77.0509	-2.59053	0.0545621	3	0.0123485	0.00791525	54.1652	1.56008	0.4097	3	-0.00489836	0.00427729	43.5605	-1.1452	0.663937	3	-0.0206384	0.0068806	59.6838	-2.9995	0.0200346		LM19 - LM62	3	-0.0150682	0.0191115	95.6846	-0.788439	0.859539	3	0.0311646	0.0227554	35.0272	1.36955	0.526304	3	0.00828205	0.0149385	30.3936	0.554409	0.94463	3	-0.0549852	0.0163752	50.091	-3.35784
LM19 - NS3	3	-0.0238711	0.00783963	55.4002	-3.04492	0.0181489	3	0.0134685	0.00688898	101.257	1.95508	0.212048	3	-0.00698202	0.00418397	44.1552	-1.66876	0.352065	3	-0.0158592	0.00729591	66.439	-2.17371	0.141249		LM19 - NS3	3	-0.0551054	0.0210904	75.4126	-2.61281	0.0518139	3	0.033987	0.0201149	83.0754	1.68964	0.335629	3	-0.0345564	0.0157321	26.7815	-2.19655	0.150003	3	-0.0853959	0.0178864	34.8813	-4.77434
LM19 - SF1	3	-0.00103367	0.00701108	78.1245	-0.147434	0.998848	3	0.0113976	0.0076883	56.0424	1.48246	0.454731	3	0.00890774	0.00450516	46.6514	1.97723	0.211222	3	-0.00337593	0.00640328	77.3357	-0.527219	0.952241		LM19 - SF1	3	-0.0361481	0.0202832	93.9578	-1.78217	0.28833	3	-0.0205805	0.0250904	44.2437	-0.820253	0.844578	3	-0.00480228	0.0137083	35.3058	-0.35032	0.984996	3	-0.0457501	0.0186698	46.1776	-2.45049
LM62 - NS3	3	-0.00601895	0.0076266	57.7476	-0.789204	0.85906	3	0.00112003	0.00812838	52.8546	0.137792	0.999054	3	-0.00208366	0.00433369	44.106	-0.480805	0.962951	3	0.0047792	0.00733616	64.1894	0.651457	0.914663		LM62 - NS3	3	-0.0400372	0.0213031	74.5547	-1.8794	0.245664	3	0.00282238	0.0234321	36.9863	0.120449	0.999363	3	-0.0428384	0.0156421	27.0184	-2.73866	0.049759	3	-0.0304107	0.01883	34.0206	-1.61502
LM62 - SF1	3	0.0168185	0.00677204	83.2087	2.48351	0.0699406	3	-0.000950822	0.00881604	45.3633	-0.107851	0.999544	3	0.0138061	0.00464454	43.2027	2.97254	0.0239553	3	0.0172624	0.00644911	72.2509	2.67672	0.0445001		LM62 - SF1	3	-0.0210799	0.0205042	90.831	-1.02807	0.733474	3	-0.0517451	0.0278205	37.3294	-1.85996	0.262467	3	-0.0130843	0.0136049	36.8765	-0.961736	0.771747	3	0.00923513	0.0195756	42.8897	0.471768
NS3 - SF1	3	0.0228374	0.00773501	55.882	2.95247	0.0231608	3	-0.00207085	0.00790755	54.9391	-0.261883	0.993636	3	0.0158898	0.00455875	44.7757	3.48555	0.00590865	3	0.0124832	0.00689047	75.1429	1.81167	0.275978		NS3 - SF1	3	0.0189573	0.0223603	64.3826	0.847812	0.831358	3	-0.0545674	0.0257057	42.6434	-2.12277	0.162333	3	0.0297541	0.0144718	27.8261	2.056	0.192483	3	0.0396458	0.0208562	36.1541	1.90091
LM19 - LM62	6	-0.00110332	0.00673451	115.418	-0.163831	0.998427	6	0.0257492	0.00730496	82.8195	3.52489	0.00379971	5	0.0051696	0.00431362	43.3502	1.19844	0.631122	5	-0.00539396	0.00691473	74.781	-0.780068	0.863252		LM19 - LM62	6	-6.65825e-06	0.0198328	115.702	-0.000335719	1	6	0.047392	0.0214841	46.9381	2.20591	0.136537	5	0.00470352	0.0147712	35.1379	0.318426	0.988634	5	-0.0242342	0.0149426	75.0174	-1.62182
LM19 - NS3	6	-0.00897022	0.00737832	79.857	-1.21575	0.618754	6	0.00236921	0.0064943	178.969	0.364813	0.98335	5	-0.000664138	0.0042459	43.6005	-0.156419	0.998616	5	-0.0166108	0.00693116	88.2316	-2.39654	0.0851716		LM19 - NS3	6	-0.047909	0.020677	105.609	-2.31702	0.10064	6	-0.0320056	0.018726	147.138	-1.70915	0.322612	5	-0.0388797	0.0161253	27.663	-2.41109	0.098372	5	-0.0734462	0.0162102	45.0567	-4.53086
LM19 - SF1	6	0.0138745	0.00671733	121.76	2.06548	0.170358	6	-0.00260962	0.00713976	87.6231	-0.365505	0.9832	5	0.0065229	0.00447589	45.2063	1.45734	0.471227	5	0.00322713	0.00639396	96.4941	0.504715	0.95778		LM19 - SF1	6	0.00450448	0.0200052	130.098	0.225166	0.995955	6	-0.0618083	0.0228604	61.1813	-2.70372	0.0428612	5	-0.0128859	0.0133493	39.9788	-0.965285	0.769741	5	-0.014743	0.0165505	65.6542	-0.890792
LM62 - NS3	6	-0.0078669	0.00728645	83.0002	-1.07966	0.702851	6	-0.02338	0.0074025	80.6904	-3.15839	0.0117457	5	-0.00583374	0.00402984	59.0576	-1.44763	0.475322	5	-0.0112168	0.00694992	85.9927	-1.61395	0.37628		LM62 - NS3	6	-0.0479024	0.0209926	99.2737	-2.28187	0.109237	6	-0.0793975	0.0217035	48.0434	-3.65828	0.00341417	5	-0.0435832	0.0160189	27.7731	-2.72073	0.0512162	5	-0.049212	0.0171798	44.4737	-2.86454
LM62 - SF1	6	0.0149778	0.00661629	126.316	2.26378	0.112151	6	-0.0283588	0.00797478	66.0973	-3.55606	0.00382712	5	0.0013533	0.00427149	56.329	0.316821	0.988874	5	0.00862109	0.00641429	92.4634	1.34404	0.537524		LM62 - SF1	6	0.00451114	0.0203311	117.424	0.221883	0.996125	6	-0.1092	0.025357	47.9045	-4.30651	0.000461636	5	-0.0175894	0.0132206	42.4841	-1.33046	0.549109	5	0.00949116	0.0175012	59.2706	0.542316
NS3 - SF1	6	0.0228447	0.00727057	81.1765	3.14208	0.0122966	6	-0.00497882	0.00723952	85.8091	-0.687729	0.901517	5	0.00718704	0.00420309	59.2138	1.70994	0.327729	5	0.0198379	0.006432	122.859	3.08426	0.0132811		NS3 - SF1	6	0.0524135	0.0211555	96.1558	2.47754	0.0699257	6	-0.0298027	0.0230668	58.1051	-1.29202	0.571665	5	0.0259938	0.0147181	25.7513	1.76611	0.31201	5	0.0587032	0.0185952	46.0825	3.15691
LM19 - LM62	8	0.00803497	0.00669994	136.731	1.19926	0.628363	8	3.20715e-05	0.00704059	109.547	0.00455523	1	6	-0.00545887	0.00435963	41.9351	-1.25214	0.597864	6	-0.00933432	0.00703733	74.5802	-1.3264	0.549242		LM19 - LM62	8	0.0350834	0.0204423	113.235	1.71621	0.320101	8	0.0175668	0.0210514	56.6082	0.834472	0.837842	6	-0.00635216	0.0147384	36.9833	-0.430995	0.972773	6	-0.0423818	0.0144968	91.2788	-2.92353
LM19 - NS3	8	0.000670287	0.00712174	101.361	0.0941184	0.999699	8	-0.00303493	0.00640738	213.163	-0.473661	0.964801	6	-0.010444	0.00430485	42.0466	-2.4261	0.0875563	6	-0.0125202	0.00684993	91.2222	-1.82778	0.267091		LM19 - NS3	8	-0.0345266	0.0205389	120.529	-1.68103	0.338168	8	-0.00824571	0.0182699	183.867	-0.451329	0.969301	6	-0.0525377	0.0163648	27.6023	-3.21041	0.0166461	6	-0.0741593	0.0156045	52.3157	-4.75243
LM19 - SF1	8	0.0205104	0.00658741	153.308	3.11357	0.0117194	8	-0.00162255	0.00692484	116.53	-0.234308	0.995447	6	0.00132859	0.00448835	43.0848	0.296009	0.990849	6	0.00706755	0.00650371	95.1753	1.08669	0.698487		LM19 - SF1	8	0.0214811	0.0199639	141.277	1.076	0.704713	8	-0.0322582	0.0216888	76.9896	-1.48732	0.450056	6	-0.0174535	0.0132237	41.468	-1.31987	0.555806	6	-0.0185902	0.0156813	80.902	-1.1855
LM62 - NS3	8	-0.00736468	0.00711831	101.926	-1.03461	0.729577	8	-0.003067	0.00704849	108.075	-0.435129	0.972284	6	-0.00498514	0.00390026	69.2874	-1.27816	0.579806	6	-0.00318586	0.00685693	89.8832	-0.464619	0.966563		LM62 - NS3	8	-0.06961	0.0209225	108.113	-3.32705	0.00649722	8	-0.0258125	0.0209313	56.2011	-1.2332	0.60865	6	-0.0461855	0.0162508	27.653	-2.84205	0.0391924	6	-0.0317776	0.0165752	51.7874	-1.91717
LM62 - SF1	8	0.0124754	0.00658369	148.272	1.8949	0.234667	8	-0.00165462	0.00752197	88.1648	-0.219972	0.996216	6	0.00678746	0.0041019	65.4629	1.65471	0.355811	6	0.0164019	0.00651109	93.0432	2.51907	0.0634929		LM62 - SF1	8	-0.0136022	0.0203583	121.28	-0.668141	0.908889	8	-0.049825	0.0239737	56.6606	-2.07832	0.172634	6	-0.0111013	0.0130823	44.4618	-0.848576	0.830914	6	0.0237916	0.0166475	71.1821	1.42913
NS3 - SF1	8	0.0198401	0.00701249	103.767	2.82925	0.0282288	8	0.00141238	0.00693287	115.431	0.203722	0.996992	6	0.0117726	0.00404362	69.2079	2.9114	0.0244088	6	0.0195877	0.00630807	151.503	3.10518	0.0120444		NS3 - SF1	8	0.0560078	0.0204553	124.044	2.73805	0.0352732	8	-0.0240125	0.0215723	73.5921	-1.11312	0.682658	6	0.0350842	0.0148907	24.6187	2.35611	0.112675	6	0.0555691	0.0176206	53.1888	3.15364
LM19 - LM62	10	0.013359	0.00672256	143.669	1.98719	0.197617	10	-0.00210619	0.00690632	137.272	-0.304966	0.990114	7	-0.012839	0.00442352	40.0412	-2.90245	0.0293558	7	0.00279912	0.0072262	69.5253	0.387357	0.980094		LM19 - LM62	10	0.0286648	0.0211445	101.868	1.35566	0.529972	10	0.014047	0.020977	64.7463	0.669637	0.908154	7	0.0044152	0.0147398	38.1976	0.299543	0.990508	7	-0.0430842	0.014256	105.771	-3.02218
LM19 - NS3	10	0.0223244	0.00691135	124.186	3.23011	0.0085063	10	0.00612633	0.00646939	213.752	0.946973	0.779498	7	-0.0174492	0.00438153	40.0706	-3.98243	0.00153699	7	-0.0122737	0.00683998	86.7275	-1.79441	0.283013		LM19 - NS3	10	0.0276813	0.0205137	124.925	1.34941	0.533431	10	0.0116747	0.018226	186.991	0.640549	0.918715	7	-0.0659337	0.0166313	27.27	-3.96444	0.00254995	7	-0.0762351	0.0151801	60.9895	-5.02204
LM19 - SF1	10	0.0101039	0.00651407	175.028	1.55108	0.409428	10	0.00117477	0.00684476	144.159	0.171631	0.998195	7	0.00379194	0.00451873	40.5352	0.839162	0.835488	7	0.0101331	0.0066856	87.7861	1.51566	0.432594		LM19 - SF1	10	-0.016162	0.0200391	137.527	-0.80652	0.851279	10	-0.0185631	0.0208203	94.5388	-0.891586	0.809229	7	-0.0142203	0.0131354	42.1282	-1.0826	0.701928	7	-0.0155576	0.0149697	100.678	-1.03927
LM62 - NS3	10	0.00896542	0.00700116	116.878	1.28056	0.577101	10	0.00823253	0.00681801	139.529	1.20747	0.62316	7	-0.00461012	0.00378767	81.3932	-1.21714	0.617848	7	-0.0150729	0.00683499	86.3467	-2.20525	0.12996		LM62 - NS3	10	-0.000983472	0.0209635	107.135	-0.0469136	0.999963	10	-0.0023723	0.0205053	62.4617	-0.115692	0.99944	7	-0.0703489	0.01651	27.2693	-4.26098	0.00117758	7	-0.0331509	0.0161412	59.8831	-2.0538
LM62 - SF1	10	-0.00325516	0.00660928	153.3	-0.492513	0.960661	10	0.00328096	0.00717517	116.424	0.457266	0.968085	7	0.016631	0.00394557	76.7118	4.2151	0.000386773	7	0.00733396	0.00668049	87.2334	1.09782	0.691808		LM62 - SF1	10	-0.0448268	0.0204993	113.712	-2.18674	0.133137	10	-0.0326101	0.0228422	64.3962	-1.42762	0.48703	7	-0.0186355	0.0129815	45.5348	-1.43554	0.484277	7	0.0275266	0.0159435	84.5213	1.72651
NS3 - SF1	10	-0.0122206	0.00680122	128.839	-1.79682	0.279583	10	-0.00495156	0.00675565	146.701	-0.732952	0.883703	7	0.0212411	0.00389844	81.3093	5.44861	3.13202e-06	7	0.0224068	0.0062607	174.695	3.57896	0.00250007		NS3 - SF1	10	-0.0438433	0.019848	153.851	-2.20895	0.125371	10	-0.0302378	0.0203451	94.0064	-1.48624	0.449824	7	0.0517134	0.0150949	23.52	3.42588	0.0112898	7	0.0606775	0.0167749	61.6535	3.61716
LM19 - LM62	13	-0.00896949	0.00686206	124.159	-1.30711	0.560167	13	-0.0101726	0.00696333	151.502	-1.46088	0.463711	8	-0.0103344	0.00450451	37.9376	-2.29423	0.117373	8	0.0111989	0.00747631	62.2545	1.49792	0.444897		LM19 - LM62	13	-0.0163354	0.0223523	79.8408	-0.730816	0.884444	13	0.0139163	0.0215401	65.5121	0.646063	0.916554	8	0.00523995	0.0147755	38.6373	0.354637	0.984475	8	-0.0361359	0.0142309	112.21	-2.53926
LM19 - NS3	13	0.0176076	0.00669163	145.651	2.63128	0.0460044	13	0.00173159	0.00683012	166.146	0.253523	0.994263	8	-0.0138563	0.00447503	37.9352	-3.09636	0.0184616	8	-0.0155304	0.00690164	77.6815	-2.25025	0.118992		LM19 - NS3	13	0.0398353	0.0206878	111.514	1.92555	0.223322	13	0.0243539	0.0189321	144.594	1.28638	0.573071	8	-0.0811662	0.0169235	26.7288	-4.79608	0.000298607	8	-0.0865057	0.0149524	70.056	-5.7854
LM19 - SF1	13	0.0112866	0.00651397	170.46	1.73268	0.310018	13	-0.0065267	0.00698544	148.906	-0.934328	0.786456	8	0.00223253	0.00456668	37.8801	0.488874	0.961105	8	0.00772086	0.00693394	77.7724	1.11349	0.682365		LM19 - SF1	13	0.0107774	0.0203669	114.143	0.529162	0.951839	13	0.00114677	0.0201679	110.567	0.056861	0.999934	8	-0.0161008	0.0130852	41.8849	-1.23046	0.611359	8	-0.0521483	0.0144391	124.036	-3.61161
LM62 - NS3	13	0.026577	0.00692638	119.468	3.83707	0.0011363	13	0.0119042	0.00672988	170.784	1.76886	0.291943	8	-0.00352189	0.00369363	94.6043	-0.953506	0.775981	8	-0.0267293	0.00688477	77.8496	-3.88238	0.00121195		LM62 - NS3	13	0.0561707	0.0212314	91.8552	2.64565	0.046484	13	0.0104377	0.020558	62.6124	0.507716	0.956959	8	-0.0864061	0.0167954	26.6866	-5.14462	0.000119433	8	-0.0503698	0.0158916	66.8644	-3.16959
LM62 - SF1	13	0.0202561	0.0067549	130.955	2.99872	0.0169088	13	0.00364593	0.00688746	146.756	0.529358	0.951831	8	0.0125669	0.00380414	90.0609	3.30348	0.00736761	8	-0.00347803	0.00691715	78.0682	-0.502813	0.958177		LM62 - SF1	13	0.0271128	0.0209188	92.3154	1.2961	0.567747	13	-0.0127695	0.0217015	65.0414	-0.588417	0.935237	8	-0.0213407	0.0129192	45.5601	-1.65186	0.360649	8	-0.0160124	0.0154096	95.4736	-1.03912
NS3 - SF1	13	-0.00632096	0.0065817	158.89	-0.960384	0.772082	13	-0.00825829	0.00675275	166.125	-1.22295	0.613183	8	0.0160888	0.00376919	95.1423	4.26851	0.00026854	8	0.0232512	0.00629161	183.164	3.6956	0.00163666		NS3 - SF1	13	-0.0290579	0.01913	187.723	-1.51898	0.428195	13	-0.0232072	0.0191155	131.571	-1.21405	0.619066	8	0.0650654	0.0153294	22.4923	4.24447	0.0016889	8	0.0343574	0.0160783	70.3527	2.13688
LM19 - LM62	15	0.00801288	0.00702218	101.486	1.14108	0.665078	15	-0.0173813	0.00717043	128.815	-2.42403	0.0776294	9	-0.00717778	0.00460171	35.8129	-1.55981	0.413828	9	0.020097	0.00778177	54.8925	2.58257	0.0586515		LM19 - LM62	15	0.0325091	0.0232479	66.3663	1.39836	0.504852	15	0.00343056	0.022339	58.1567	0.153568	0.998695	9	0.00767821	0.0148453	38.2671	0.517216	0.95446	9	0.00924231	0.0144224	107.084	0.64083
LM19 - NS3	15	0.0169776	0.00661401	140.311	2.56691	0.0543944	15	0.00657344	0.00722833	121.613	0.9094	0.79987	9	-0.00990801	0.00458432	35.8129	-2.16128	0.153747	9	-0.0176803	0.00703302	67.6177	-2.51389	0.0667463		LM19 - NS3	15	0.041603	0.0209425	95.1547	1.98654	0.200313	15	0.0397121	0.0198748	108.689	1.99811	0.195061	9	-0.0393079	0.01724	26.0409	-2.28004	0.128838	9	-0.0430898	0.0149304	77.0042	-2.88603
LM19 - SF1	15	0.0147005	0.00658716	144.514	2.23168	0.119615	15	-0.0107413	0.00724524	120.965	-1.48254	0.451173	9	0.000533734	0.00463165	35.3296	0.115236	0.999442	9	0.0130286	0.00724191	67.7132	1.79905	0.282762		LM19 - SF1	15	0.0186789	0.0207233	94.9398	0.901347	0.804127	15	-0.00210476	0.0201993	104.461	-0.1042	0.999592	9	-0.00992598	0.0130735	40.7953	-0.759242	0.872173	9	-0.036421	0.0141098	146.746	-2.58126
LM62 - NS3	15	0.00896472	0.00694553	107.011	1.29072	0.570832	15	0.0239548	0.006848	157.086	3.49807	0.00338323	9	-0.00273023	0.00361958	106.854	-0.754296	0.874641	9	-0.0377772	0.00700474	67.937	-5.3931	5.57116e-06		LM62 - NS3	15	0.00909395	0.0215436	78.0989	0.422118	0.97454	15	0.0362815	0.0210516	56.422	1.72346	0.32132	9	-0.0469861	0.0171056	25.9671	-2.74682	0.0496469	9	-0.0523321	0.0158351	69.8844	-3.30481
LM62 - SF1	15	0.00668758	0.00691997	107.258	0.966417	0.768771	15	0.00664	0.00686585	135.472	0.967105	0.768344	9	0.00771152	0.00367934	104.728	2.0959	0.161197	9	-0.0070684	0.00721445	68.2944	-0.979756	0.761401		LM62 - SF1	15	-0.0138302	0.0213306	77.2428	-0.648372	0.915812	15	-0.00553532	0.0213581	56.7314	-0.259167	0.993831	9	-0.0176042	0.0128958	44.5537	-1.36511	0.527418	9	-0.0456633	0.0150638	98.4726	-3.03133
NS3 - SF1	15	-0.00227714	0.00650539	162.029	-0.350039	0.985228	15	-0.0173148	0.00692628	143.197	-2.49987	0.0641895	9	0.0104417	0.00365757	109.24	2.85484	0.0261215	9	0.0307088	0.00639966	172.408	4.79851	2.03695e-05		NS3 - SF1	15	-0.0229241	0.0187914	192.695	-1.21993	0.614967	15	-0.0418169	0.0187656	152.362	-2.22838	0.120228	9	0.0293819	0.0155929	21.5522	1.88431	0.263884	9	0.00666877	0.0155509	76.6474	0.428835
LM19 - LM62	16	0.0161497	0.00712114	90.1627	2.26785	0.113351	16	-0.0253287	0.00732111	112.369	-3.45967	0.00420393	10	-0.0122185	0.00471412	33.7784	-2.5919	0.0639214	10	0.0332032	0.00813634	48.4278	4.08086	0.000933081		LM19 - LM62	16	0.0387338	0.0237199	60.4378	1.63297	0.368185	16	0.0518548	0.0228536	53.549	2.269	0.118289	10	0.0209862	0.0149486	37.1688	1.4039	0.504939	10	0.0195481	0.0148222	93.6263	1.31884
LM19 - NS3	16	0.00923481	0.00659672	131.271	1.39991	0.501672	16	-0.0391742	0.00746778	102.194	-5.24575	5.01037e-06	10	-0.0212888	0.00470831	33.7994	-4.52153	0.000400935	10	-0.020937	0.00723031	58.5071	-2.89573	0.0265377		LM19 - NS3	16	0.0157688	0.0211101	86.4402	0.746981	0.877711	16	0.0143497	0.0204702	92.879	0.701006	0.896436	10	-0.0498603	0.0175797	25.2609	-2.83625	0.0413255	10	-0.0642005	0.0151151	78.6455	-4.24744
LM19 - SF1	16	0.00469439	0.00664516	128.336	0.706437	0.894386	16	-0.0549524	0.00742037	104.285	-7.40561	2.10806e-10	10	-0.00333647	0.00471295	32.9922	-0.707938	0.893229	10	0.0220915	0.00760226	58.8296	2.90591	0.0258017		LM19 - SF1	16	-0.00787599	0.020941	85.6269	-0.376104	0.981748	16	-0.0390892	0.0203561	96.5796	-1.92027	0.226418	10	-0.00849184	0.0131006	39.0243	-0.648204	0.915542	10	-0.0163239	0.013996	160.065	-1.16633
LM62 - NS3	16	-0.00691489	0.00697575	98.2443	-0.991274	0.754735	16	-0.0138455	0.00695823	139.638	-1.9898	0.196769	10	-0.00907026	0.00356676	114.69	-2.54299	0.0587048	10	-0.0541403	0.0071914	58.782	-7.52848	2.11587e-09		LM62 - NS3	16	-0.022965	0.0217383	71.2594	-1.05643	0.716891	16	-0.037505	0.0214281	52.3822	-1.75027	0.308734	10	-0.0708465	0.0174393	25.1646	-4.06245	0.00221703	10	-0.0837486	0.0159739	67.349	-5.24285
LM62 - SF1	16	-0.0114553	0.00702158	95.4506	-1.63144	0.366057	16	-0.0296238	0.00690732	121.245	-4.28875	0.000210647	10	0.00888203	0.00357289	118.523	2.48595	0.0673183	10	-0.0111118	0.00756526	59.4108	-1.46879	0.462542		LM62 - SF1	16	-0.0466098	0.0215741	70.2148	-2.16045	0.144542	16	-0.0909439	0.0213191	51.4512	-4.26584	0.000483394	10	-0.0294781	0.0129116	42.681	-2.28306	0.118082	10	-0.035872	0.0149193	91.5289	-2.4044
NS3 - SF1	16	-0.00454043	0.00648912	156.112	-0.699698	0.897058	16	-0.0157783	0.0070626	124.794	-2.23406	0.119763	10	0.0179523	0.00356522	120.584	5.0354	9.99812e-06	10	0.0430285	0.00658107	147.498	6.53823	5.72017e-09		NS3 - SF1	16	-0.0236448	0.0186666	187.84	-1.26669	0.58527	16	-0.0534389	0.0187416	155.287	-2.85136	0.0252349	10	0.0413685	0.0158838	20.7028	2.60444	0.0728924	10	0.0478766	0.0152104	77.3787	3.14763
LM19 - LM62	17	0.0131689	0.00723202	79.617	1.82091	0.271239	17	0.00300995	0.00750081	96.0919	0.401283	0.978012	11	-0.00919151	0.00484067	31.8885	-1.89881	0.248779	11	0.0237751	0.00853391	43.092	2.78596	0.0381123		LM19 - LM62	17	0.052273	0.0242067	55.0823	2.15944	0.147569	17	0.0308142	0.0234384	48.954	1.31469	0.558192	11	0.0125805	0.0150847	35.5105	0.833989	0.837948	11	0.0191948	0.0154141	78.0131	1.24528
LM19 - NS3	17	0.0088381	0.00659396	119.259	1.34033	0.539247	17	-0.0104116	0.0077309	85.9648	-1.34675	0.536034	11	-0.0140685	0.00484585	31.9375	-2.90321	0.0320117	11	-0.0379416	0.00748832	50.9303	-5.06677	3.30346e-05		LM19 - NS3	17	0.0243561	0.0213036	77.9115	1.14328	0.664034	17	-0.0182218	0.0211392	79.3383	-0.861989	0.824339	11	-0.0336596	0.0179411	24.4331	-1.87611	0.264072	11	-0.032884	0.015499	73.9346	-2.12169
LM19 - SF1	17	0.0115473	0.00671696	111.985	1.71913	0.318659	17	-0.00974876	0.00762302	88.8273	-1.27886	0.578727	11	-0.00190836	0.00480974	30.9051	-0.39677	0.978454	11	0.0194128	0.00800792	51.4496	2.4242	0.0851272		LM19 - SF1	17	0.017375	0.0211839	76.839	0.8202	0.844746	17	-0.0484407	0.0206046	86.9672	-2.35097	0.0945766	11	0.0137069	0.013166	36.7911	1.04108	0.726666	11	0.00944246	0.014103	154.807	0.669533
LM62 - NS3	17	-0.00433078	0.00701953	88.81	-0.616961	0.926419	17	-0.0134215	0.00710062	119.557	-1.89019	0.237747	11	-0.00487703	0.00353614	114.732	-1.3792	0.514922	11	-0.0617167	0.00743971	51.1083	-8.29558	2.91231e-10		LM62 - NS3	17	-0.0279169	0.0219577	64.7255	-1.2714	0.584259	17	-0.049036	0.0218855	48.2066	-2.24057	0.126907	11	-0.0462401	0.0177952	24.3217	-2.59845	0.0696236	11	-0.0520789	0.0163028	60.6515	-3.19447
LM62 - SF1	17	-0.00162154	0.0071352	84.393	-0.227259	0.995831	17	-0.0127587	0.00698301	104.969	-1.82711	0.266508	11	0.00728315	0.00348649	127.62	2.08896	0.162249	11	-0.00436236	0.00796249	51.9285	-0.547863	0.946716		LM62 - SF1	17	-0.0348979	0.0218415	63.6644	-1.59778	0.387198	17	-0.0792549	0.0213696	46.2015	-3.70878	0.00302748	11	0.00112639	0.0129665	40.1965	0.0868693	0.999761	11	-0.00975237	0.014982	78.743	-0.650941
NS3 - SF1	17	0.00270924	0.00648762	145.415	0.417601	0.975393	17	0.000662825	0.0072296	106.022	0.0916821	0.999722	11	0.0121602	0.00349368	125.213	3.48062	0.00380255	11	0.0573544	0.00682998	118.763	8.39745	7.19313e-13		NS3 - SF1	17	-0.00698103	0.0185724	177.802	-0.375883	0.981844	17	-0.0302189	0.0188193	149.924	-1.60574	0.378507	11	0.0473665	0.0162008	19.9395	2.92372	0.0387121	11	0.0423265	0.0150693	71.7823	2.80879
LM19 - LM62	18	0.00841121	0.00735429	70.1194	1.14371	0.66392	18	-0.00106939	0.0077075	81.5583	-0.138747	0.999039	12	-0.00988748	0.00498029	30.1618	-1.98532	0.215855	12	0.0058109	0.00896875	38.7924	0.647906	0.915643		LM19 - LM62	18	0.0394388	0.0247075	50.282	1.59623	0.389964	18	0.0188961	0.0240884	44.651	0.784448	0.861109	12	0.025358	0.0152528	33.4953	1.66251	0.358907	12	0.0290773	0.016177	64.2356	1.79744
LM19 - NS3	18	0.00721374	0.00660574	105.679	1.09204	0.695162	18	-0.0070531	0.00801535	72.8629	-0.879949	0.815227	12	-0.0153711	0.00499584	30.2393	-3.07677	0.0217344	12	-0.0407466	0.00780101	44.8255	-5.22324	2.55341e-05		LM19 - NS3	18	0.02225	0.0215225	69.834	1.0338	0.730274	18	-0.0155822	0.0218752	68.112	-0.712325	0.891879	12	0.00240451	0.018323	23.5906	0.131229	0.999169	12	-0.0400059	0.0160679	65.2327	-2.48981
LM19 - SF1	18	0.0118074	0.00680213	96.5621	1.73584	0.310979	18	-0.0157034	0.00785104	75.5462	-2.00017	0.197069	12	-0.0041909	0.00492111	29.0653	-0.851617	0.829315	12	0.029398	0.00845238	45.4882	3.47808	0.0059753		LM19 - SF1	18	0.0255635	0.0214512	68.7178	1.1917	0.634128	18	-0.10449	0.0209415	76.8781	-4.98959	2.15414e-05	12	0.0263265	0.0132693	34.314	1.98402	0.213734	12	0.00565975	0.014426	132.064	0.392331
LM62 - NS3	18	-0.00119747	0.00707662	79.3511	-0.169214	0.998263	18	-0.00598371	0.00727329	100.179	-0.822696	0.843603	12	-0.00548359	0.00352828	106.32	-1.55418	0.409219	12	-0.0465575	0.00774377	44.9132	-6.01225	1.77233e-06		LM62 - NS3	18	-0.0171888	0.0222012	58.6157	-0.774231	0.865776	18	-0.0344784	0.0224189	44.1628	-1.53791	0.424123	12	-0.0229534	0.018172	23.4701	-1.26312	0.594445	12	-0.0690832	0.0168108	52.6264	-4.10944
LM62 - SF1	18	0.00339617	0.00726028	74.3657	0.467773	0.965875	18	-0.0146341	0.0070918	89.0997	-2.06352	0.173141	12	0.00569658	0.00342164	127.95	1.66487	0.346542	12	0.0235871	0.00839958	45.8478	2.80813	0.0354598		LM62 - SF1	18	-0.0138753	0.022132	57.6378	-0.626935	0.922992	18	-0.123386	0.0215089	41.3364	-5.73651	5.83185e-06	12	0.000968571	0.0130599	37.3713	0.0741637	0.999851	12	-0.0234175	0.0152491	65.4028	-1.53566
NS3 - SF1	18	0.00459363	0.00650091	131.123	0.706614	0.89432	18	-0.00865035	0.00742522	89.0538	-1.165	0.650369	12	0.0111802	0.00344425	120.558	3.24604	0.00814822	12	0.0701446	0.00713934	93.6148	9.82508	4.87491e-10		NS3 - SF1	18	0.00331347	0.0185091	163.107	0.179018	0.997955	18	-0.0889073	0.0189974	136.405	-4.67997	4.02166e-05	12	0.023922	0.0165422	19.2537	1.44612	0.487434	12	0.0456657	0.0151333	62.4781	3.01756
LM19 - LM62	19	0.00860705	0.0074874	61.7635	1.14954	0.660534	19	-0.0105455	0.00793908	69.3476	-1.3283	0.548291	13	-0.0154191	0.00513191	28.5977	-3.00456	0.0265665	13	0.0145307	0.00943572	35.3465	1.53997	0.425212		LM19 - LM62	19	0.069554	0.0252214	46.0015	2.75774	0.040076	19	0.0140016	0.0247985	40.7782	0.564615	0.941972	13	-0.01123	0.0154519	31.3136	-0.726772	0.885638	13	0.0274534	0.017088	53.4499	1.60659
LM19 - NS3	19	0.00333918	0.00663199	91.869	0.503496	0.958055	19	-0.0131914	0.00831895	62.4647	-1.58571	0.394105	13	-0.0206741	0.00515719	28.7009	-4.00879	0.00212458	13	-0.0279364	0.00816211	39.9468	-3.42269	0.007576		LM19 - NS3	19	0.0343356	0.021766	62.3732	1.57749	0.398758	19	3.25351e-05	0.0226715	58.9816	0.00143506	1	13	-0.0479129	0.0187242	22.7571	-2.55888	0.077186	13	-0.0833684	0.0168029	55.8226	-4.96155
LM19 - SF1	19	0.00923368	0.00690016	82.7296	1.33818	0.541524	19	-0.00695108	0.0081023	64.6131	-0.857914	0.826354	13	-0.00556663	0.00504609	27.4503	-1.10316	0.690632	13	0.0368099	0.00892984	40.7219	4.12213	0.000996305		LM19 - SF1	19	0.00724802	0.021742	61.3389	0.333364	0.987105	19	-0.0362942	0.0213626	67.2634	-1.69896	0.33229	13	-0.0204646	0.0134095	31.7739	-1.52612	0.434355	13	0.00446523	0.0149507	103.755	0.298663
LM62 - NS3	19	-0.00526787	0.00714669	70.3364	-0.737106	0.881797	19	-0.00264595	0.00747413	83.369	-0.354014	0.984681	13	-0.00525496	0.00354335	92.3389	-1.48305	0.451814	13	-0.0424671	0.00809727	39.9656	-5.24462	3.1336e-05		LM62 - NS3	19	-0.0352185	0.0224679	52.9951	-1.5675	0.405655	19	-0.013969	0.023023	40.4171	-0.606743	0.929349	13	-0.0366829	0.0185683	22.6318	-1.97556	0.226525	13	-0.110822	0.0174823	45.2638	-6.33909
LM62 - SF1	19	0.000626626	0.00739623	65.4861	0.0847224	0.99978	19	0.00359441	0.00723221	75.0476	0.497	0.959511	13	0.00985252	0.0033796	118.239	2.91529	0.0218143	13	0.0222792	0.00887062	40.9766	2.51158	0.0729687		LM62 - SF1	19	-0.062306	0.0224447	52.1514	-2.77598	0.0370996	19	-0.0502958	0.0217353	37.0251	-2.31402	0.113168	13	-0.00923459	0.0131911	34.4386	-0.700065	0.89634	13	-0.0229882	0.0157104	54.1673	-1.46324
NS3 - SF1	19	0.0058945	0.00652888	114.953	0.902834	0.803342	19	0.00624036	0.00764727	74.7936	0.816024	0.846717	13	0.0151075	0.00341788	107.742	4.42014	0.000137414	13	0.0647463	0.00750168	74.3187	8.63092	0		NS3 - SF1	19	-0.0270875	0.0184772	145.02	-1.466	0.460696	19	-0.0363267	0.0192732	117.851	-1.88483	0.240129	13	0.0274483	0.0169067	18.6354	1.62351	0.390215	13	0.0878337	0.0153998	52.7727	5.70356
LM19 - LM62													14	-0.0124288	0.0052945	27.1864	-2.3475	0.112069	14	0.00613825	0.00993028	32.5746	0.618134	0.925548		LM19 - LM62													14	0.0238414	0.0156807	29.1158	1.52043	0.4387	14	0.0209418	0.0181249	45.3984	1.15542
LM19 - NS3													14	-0.0177573	0.00532887	27.3112	-3.33228	0.0124925	14	-0.0296707	0.0085655	36.0414	-3.46397	0.00726997		LM19 - NS3													14	-0.00936123	0.0191433	21.9483	-0.489007	0.960728	14	-0.0773511	0.0176834	47.6138	-4.37422
LM19 - SF1													14	-0.00596804	0.00518371	26.0312	-1.15131	0.661893	14	0.0380994	0.00943529	36.9131	4.03797	0.00143344		LM19 - SF1													14	-0.00388811	0.0135856	29.3009	-0.286194	0.991653	14	0.000595544	0.0156571	79.5735	0.0380366
LM62 - NS3													14	-0.00532842	0.00358104	76.9061	-1.48795	0.44968	14	-0.0358089	0.00849407	36.0119	-4.21575	0.000883499		LM62 - NS3													14	-0.0332027	0.0189831	21.8215	-1.74907	0.323806	14	-0.0982929	0.0182992	39.2697	-5.37142
LM62 - SF1													14	0.0064608	0.00336122	101.522	1.92216	0.225303	14	0.0319612	0.0093705	37.0844	3.41083	0.00821742		LM62 - SF1													14	-0.0277296	0.0133588	31.5698	-2.07575	0.183025	14	-0.0203463	0.0163494	45.5047	-1.24446
NS3 - SF1													14	0.0117892	0.0034151	90.8396	3.45208	0.00462127	14	0.0677701	0.00790971	60.295	8.56796	5.07874e-11		NS3 - SF1													14	0.00547312	0.0172928	18.0746	0.316497	0.988652	14	0.0779467	0.0158586	44.4745	4.91509
LM19 - LM62													15	-0.0169511	0.00546708	25.9144	-3.10058	0.0224471	15	3.48386e-05	0.0104485	30.3271	0.00333431	1		LM19 - LM62													15	0.0167513	0.015938	27.0046	1.05103	0.721405	15	-0.013728	0.0192672	39.4583	-0.712503
LM19 - NS3													15	-0.0191808	0.00550991	26.0568	-3.48114	0.00903182	15	-0.0314369	0.00900549	32.8981	-3.49086	0.00725136		LM19 - NS3													15	-0.0174047	0.0195794	21.1738	-0.888929	0.810594	15	-0.0812113	0.0186889	41.1066	-4.34543
LM19 - SF1													15	-0.00275865	0.00533297	24.7794	-0.517282	0.954159	15	0.0241651	0.00996448	33.8541	2.42512	0.0914224		LM19 - SF1													15	-0.00942077	0.0137961	26.9767	-0.682856	0.902711	15	-0.00522609	0.0165219	61.9881	-0.316314
LM62 - NS3													15	-0.00222967	0.00364066	62.8908	-0.612436	0.927758	15	-0.0314718	0.00892838	32.836	-3.52491	0.00664032		LM62 - NS3													15	-0.034156	0.019415	21.0477	-1.75925	0.319872	15	-0.0674833	0.0192431	34.6299	-3.50688
LM62 - SF1													15	0.0141925	0.00336688	82.8131	4.21531	0.000363052	15	0.0241302	0.00989485	33.9622	2.43867	0.0888018		LM62 - SF1													15	-0.0261721	0.0135619	28.8735	-1.92983	0.23821	15	0.00850188	0.0171463	39.0323	0.495844
NS3 - SF1													15	0.0164221	0.00343599	73.9548	4.77945	5.08382e-05	15	0.055602	0.00835675	50.2356	6.65354	1.21552e-07		NS3 - SF1													15	0.0079839	0.0176991	17.5624	0.451091	0.968541	15	0.0759852	0.0164937	37.992	4.60692
[truncated: 1 more columns]

## Sheet: Table S5
Table S5. Pairwise comparisons test using mixed models for determining the significant differences between the means of four wheat genotypes for Chlorophyll fluorescence measurements on dark-adapted plants. From light response curves at PPFD of 750 µmol m-2 s-1, S5.1 Maximum quantum efficiency of PSII photochemistry in (Fv/Fm). S5.2 PSII operating efficiency (Fq'/Fm'). S5.3 Fraction of open PSII …
Table S5.1. Analysis of maximum quantum efficiency of PSII photochemistry (Fv/Fm) from light response curves of four wheat genotypes under different treatments in different time points.																										Table S5.2. Analysis of PSII operating efficiency (Fq'/Fm') from light response curves of four wheat genotypes under different treatments in different time points.
Treatments	Control						Drought						Heat						Combined							Treatments	Control						Drought						Heat						Combined
contrast	Days.after.inducing.stress	estimate	SE	df	t.ratio	p.value	Days.after.inducing.stress	estimate	SE	df	t.ratio	p.value	Days.after.inducing.stress	estimate	SE	df	t.ratio	p.value	Days.after.inducing.stress	estimate	SE	df	t.ratio	p.value		contrast	Days.after.inducing.stress	estimate	SE	df	t.ratio	p.value	Days.after.inducing.stress	estimate	SE	df	t.ratio	p.value	Days.after.inducing.stress	estimate	SE	df	t.ratio	p.value	Days.after.inducing.stress	estimate	SE	df	t.ratio
LM19 - LM62	1	0.000579723	0.00584003	30.3018	0.0992671	0.999642	1	-0.00335313	0.00504922	54.4071	-0.66409	0.910092	1	-0.00409939	0.00851505	29.9364	-0.481428	0.962625	1	-0.00449478	0.0127237	29.9607	-0.35326	0.984582		LM19 - LM62	1	-0.00596218	0.0135858	38.7307	-0.438853	0.971352	1	-0.0536932	0.0194781	22.5956	-2.75659	0.0515432	1	0.0218882	0.00812389	23.2843	2.6943	0.0579862	1	-0.0379609	0.0133447	19.7224	-2.84464
LM19 - NS3	1	0.022961	0.00604484	21.2749	3.79845	0.00527001	1	0.00596751	0.00800226	11.4149	0.745728	0.876655	1	0.0395662	0.0125829	18.2749	3.14443	0.0259146	1	0.0193604	0.0145708	25.7034	1.32871	0.553736		LM19 - NS3	1	0.00419074	0.0170853	20.2317	0.245284	0.994646	1	-0.0313644	0.0196704	27.8479	-1.5945	0.397996	1	-0.0183277	0.00646197	39.3049	-2.83624	0.0347302	1	0.00997439	0.0184031	12.6593	0.541996
LM19 - SF1	1	-0.00143057	0.00510208	40.5637	-0.28039	0.992187	1	-0.000679767	0.00507957	53.6206	-0.133824	0.999133	1	0.0268806	0.0105318	22.7816	2.55234	0.0781787	1	-0.00146149	0.0111572	33.5977	-0.130991	0.999181		LM19 - SF1	1	0.04235	0.0182614	15.994	2.3191	0.135065	1	-0.00432196	0.021742	26.1616	-0.198784	0.997146	1	0.0212999	0.00645457	39.578	3.29998	0.0106149	1	-0.0024181	0.0134904	19.5319	-0.179246
LM62 - NS3	1	0.0223813	0.00657561	22.7	3.40368	0.0122685	1	0.00932065	0.00798886	11.3552	1.16671	0.658256	1	0.0436656	0.0132826	19.2601	3.28743	0.0183521	1	0.0238551	0.0151591	25.4299	1.57366	0.410843		LM62 - NS3	1	0.0101529	0.017586	21.6788	0.577329	0.937811	1	0.0223288	0.0156991	18.0844	1.4223	0.502236	1	-0.0402159	0.00797164	23.2737	-5.04487	0.000222247	1	0.0479353	0.0178888	12.7107	2.67963
LM62 - SF1	1	-0.00201029	0.005721	30.521	-0.351389	0.984823	1	0.00267337	0.00505844	54.0864	0.528497	0.9518	1	0.03098	0.0113584	23.1691	2.72749	0.0542031	1	0.00303329	0.0119152	31.5826	0.254573	0.994094		LM62 - SF1	1	0.0483122	0.0187308	17.2462	2.5793	0.0822465	1	0.0493712	0.0182278	22.3285	2.70857	0.0572623	1	-0.000588231	0.00796564	23.1753	-0.073846	0.999851	1	0.0355428	0.0127799	19.9134	2.78114
NS3 - SF1	1	-0.0243916	0.00592992	20.6141	-4.11331	0.0026604	1	-0.00664728	0.00800808	11.4419	-0.830071	0.839226	1	-0.0126856	0.0146574	20.2872	-0.865473	0.822384	1	-0.0208218	0.0138704	26.0114	-1.50118	0.45123		NS3 - SF1	1	0.0381593	0.021405	18.7364	1.78273	0.312091	1	0.0270424	0.0184331	28.8928	1.46706	0.46968	1	0.0396276	0.00626187	35.8264	6.32841	1.51281e-06	1	-0.0123925	0.0179977	12.6455	-0.688558
LM19 - LM62	3	0.00352832	0.00542763	40.5511	0.650067	0.914916	3	-0.00892418	0.00501022	81.4634	-1.78119	0.289772	3	-0.0118035	0.00710994	58.0867	-1.66014	0.353888	3	0.00658856	0.0102661	64.5145	0.641779	0.918027		LM19 - LM62	3	0.0103244	0.0138205	49.6195	0.747037	0.877488	3	-0.0390283	0.0172891	29.7827	-2.25739	0.131283	3	-0.00618216	0.00742576	36.5071	-0.832529	0.83866	3	-0.0160844	0.0122693	44.3831	-1.31095
LM19 - NS3	3	0.00514208	0.00572439	25.6628	0.898276	0.805785	3	0.016162	0.0078587	12.5384	2.05658	0.219711	3	0.0341684	0.0108117	20.2371	3.16031	0.0232002	3	0.0861728	0.0116964	46.2068	7.36743	1.48796e-08		LM19 - NS3	3	0.0215207	0.0164893	24.6755	1.30513	0.56844	3	-0.0110674	0.0176156	36.1512	-0.628273	0.922286	3	-0.00580711	0.00644564	71.5432	-0.900937	0.804348	3	0.0214535	0.0157354	20.4219	1.36339
LM19 - SF1	3	-8.1978e-05	0.00478279	62.0013	-0.0171402	0.999998	3	-0.000225691	0.00503279	80.3132	-0.0448441	0.999967	3	0.0173011	0.00886307	30.4753	1.95205	0.228313	3	0.0200881	0.00947595	80.2394	2.11991	0.155597		LM19 - SF1	3	0.0362647	0.017668	18.5956	2.05256	0.205147	3	-0.004369	0.0189989	32.0974	-0.22996	0.995627	3	0.00859658	0.00640378	74.7374	1.34242	0.539187	3	0.00147701	0.0122437	44.6516	0.120635
LM62 - NS3	3	0.00161376	0.00618969	27.296	0.260718	0.993643	3	0.0250862	0.00784882	12.4875	3.19618	0.032454	3	0.0459719	0.0112639	21.2379	4.08133	0.00273322	3	0.0795843	0.012081	44.6072	6.58757	2.56569e-07		LM62 - NS3	3	0.0111963	0.0172927	26.8204	0.647457	0.915509	3	0.0279609	0.0144992	26.6329	1.92845	0.240578	3	0.000375046	0.00756581	37.5247	0.0495711	0.999955	3	0.0375379	0.0156147	20.9919	2.404
LM62 - SF1	3	-0.0036103	0.00533092	41.0627	-0.677238	0.905126	3	0.00869848	0.00501734	81.0015	1.73368	0.313186	3	0.0291046	0.00940939	30.46	3.09315	0.0208106	3	0.0134996	0.00994668	71.6732	1.3572	0.530096		LM62 - SF1	3	0.0259403	0.0184201	20.6674	1.40826	0.508484	3	0.0346593	0.0161516	30.6804	2.14587	0.16149	3	0.0147787	0.00753018	37.484	1.9626	0.220273	3	0.0175614	0.0120882	44.8874	1.45277
NS3 - SF1	3	-0.00522406	0.00563278	24.9117	-0.92744	0.790514	3	-0.0163877	0.00786324	12.563	-2.08409	0.21066	3	-0.0168673	0.012445	22.6486	-1.35534	0.538872	3	-0.0660847	0.0114171	48.312	-5.7882	3.03842e-06		NS3 - SF1	3	0.014744	0.0204986	21.4117	0.719269	0.888335	3	0.00669844	0.0165007	38.9593	0.405949	0.977076	3	0.0144037	0.00656566	64.9739	2.19379	0.135791	3	-0.0199765	0.0155946	20.7292	-1.28098
LM19 - LM62	6	-0.00328522	0.00491253	63.2377	-0.668743	0.908471	6	-0.00175328	0.00497485	109.235	-0.352429	0.984905	5	-0.0059722	0.0064253	98.0309	-0.929481	0.789122	5	-0.00113099	0.00918192	108.43	-0.123176	0.999328		LM19 - LM62	6	0.0342815	0.0143541	52.5035	2.38827	0.0918674	6	-0.0163865	0.0148881	52.3604	-1.10064	0.690717	5	0.0118793	0.00705241	55.1583	1.68443	0.341558	5	0.0062795	0.0125548	50.7604	0.500167
LM19 - NS3	6	0.000380954	0.00536242	32.8637	0.0710416	0.999869	6	0.0205367	0.00765368	14.0208	2.68324	0.0748432	5	0.0260926	0.00938855	23.2793	2.77919	0.048496	5	0.0657358	0.0101304	89.3389	6.48897	2.84576e-08		LM19 - NS3	6	0.0103868	0.0157248	32.7321	0.660538	0.911058	6	-0.0256765	0.0154552	50.4544	-1.66135	0.354555	5	-0.0174045	0.00684001	68.4935	-2.54452	0.0619703	5	-0.00350068	0.0140335	35.5495	-0.249452
LM19 - SF1	6	0.00126434	0.00444803	100.539	0.284246	0.991944	6	0.00192277	0.00498542	108.646	0.385679	0.980401	5	0.0133407	0.00767321	44.0921	1.73861	0.316477	5	0.01719	0.00951421	93.6351	1.80678	0.276662		LM19 - SF1	6	0.0515809	0.0168987	23.0796	3.05236	0.0268875	6	0.0120719	0.0153883	50.5401	0.784485	0.861143	5	0.00951526	0.00676798	73.8187	1.40592	0.499734	5	0.00121396	0.0123474	54.8762	0.098317
LM62 - NS3	6	0.00366617	0.00570671	35.1285	0.642432	0.91747	6	0.02229	0.00764932	13.9938	2.91398	0.0493401	5	0.0320648	0.00948756	23.6367	3.37966	0.0125245	5	0.0668668	0.0101696	88.9284	6.57517	1.96857e-08		LM62 - NS3	6	-0.0238947	0.0170024	34.3265	-1.40537	0.504695	6	-0.00928998	0.0141189	47.1445	-0.657982	0.912209	5	-0.0292838	0.00750907	51.3497	-3.89979	0.00155561	5	-0.00978018	0.0144235	35.1422	-0.678071
LM62 - SF1	6	0.00454956	0.00485757	63.8108	0.93659	0.785326	6	0.00367605	0.00497873	108.975	0.738351	0.8814	5	0.0193129	0.00779404	43.8837	2.4779	0.0775852	5	0.018321	0.00955595	92.9784	1.91724	0.227935		LM62 - SF1	6	0.0172994	0.0180936	26.1414	0.956104	0.775058	6	0.0284583	0.0140456	58.7484	2.02614	0.190199	5	-0.00236401	0.00744352	52.6245	-0.317593	0.988786	5	-0.00506554	0.0127889	48.8103	-0.396087
NS3 - SF1	6	0.000883382	0.00531211	32.1575	0.166296	0.998329	6	-0.0186139	0.0076562	14.0375	-2.43122	0.116267	5	-0.0127519	0.0103734	25.7787	-1.22929	0.614465	5	-0.0485457	0.0104706	83.6516	-4.63639	7.5426e-05		NS3 - SF1	6	0.0411941	0.0191991	25.8274	2.14562	0.165664	6	0.0377483	0.0146453	53.8274	2.5775	0.0595659	5	0.0269198	0.0072426	60.4739	3.71687	0.00243999	5	0.00471464	0.0142434	35.5772	0.331006
LM19 - LM62	8	-0.00234934	0.00465599	79.8443	-0.504584	0.957767	8	-0.00221232	0.00496692	113.526	-0.445411	0.970381	6	-0.00457066	0.00643499	98.2942	-0.710282	0.892805	6	0.00724074	0.00932985	104.353	0.776083	0.865109		LM19 - LM62	8	0.0263167	0.0148208	47.2848	1.77566	0.297603	8	0.003991	0.0141114	71.0419	0.282821	0.992041	6	0.00818034	0.00700555	62.4997	1.16769	0.649271	6	-0.0238871	0.0131968	43.3981	-1.81007
LM19 - NS3	8	0.0090003	0.00521307	36.1256	1.72649	0.32519	8	0.00688248	0.00752431	14.717	0.914699	0.79746	6	0.0258415	0.00886162	25.7745	2.91611	0.0342862	6	0.0491502	0.0100513	99.9416	4.88995	2.27175e-05		LM19 - NS3	8	0.0394271	0.0153115	38.5412	2.575	0.0642055	8	0.0473693	0.0148396	46.7012	3.1921	0.0130351	6	0.000252098	0.00717282	58.5381	0.0351463	0.999984	6	-0.0179866	0.013666	44.1886	-1.31615
LM19 - SF1	8	0.0070405	0.0043383	112.002	1.62287	0.37003	8	0.0042435	0.00496938	113.409	0.85393	0.828397	6	0.0110011	0.00733472	53.3009	1.49986	0.444762	6	0.0135802	0.0102061	75.1968	1.3306	0.546578		LM19 - SF1	8	0.0678674	0.0164752	26.2136	4.11938	0.00180729	8	0.0414694	0.0135279	73.0989	3.06546	0.0157604	6	0.0260677	0.00708859	63.159	3.67742	0.0026879	6	-0.00405254	0.0129121	48.3954	-0.313857
LM62 - NS3	8	0.0113496	0.00546188	38.5677	2.07797	0.178418	8	0.0090948	0.00752381	14.7137	1.2088	0.631101	6	0.0304121	0.00873731	25.1938	3.48072	0.00931785	6	0.0419095	0.00988182	102.439	4.24107	0.000282135		LM62 - NS3	8	0.0131104	0.0169126	37.1009	0.775185	0.865152	8	0.0433783	0.0148684	47.492	2.91749	0.0266711	6	-0.00792824	0.00761593	51.8804	-1.04101	0.726297	6	0.00590047	0.0143283	40.0064	0.411805
LM62 - SF1	8	0.00938984	0.00463432	80.0131	2.02615	0.187083	8	0.00645583	0.00496862	113.434	1.29932	0.565272	6	0.0155717	0.00718404	53.4722	2.16755	0.145575	6	0.00633951	0.0100393	77.3093	0.631472	0.921593		LM62 - SF1	8	0.0415507	0.0179729	29.0486	2.31185	0.118596	8	0.0374784	0.0135596	78.8387	2.76399	0.0350939	6	0.0178874	0.00753665	54.0566	2.37338	0.0945393	6	0.0198345	0.0136111	40.3909	1.45724
NS3 - SF1	8	-0.0019598	0.00519373	35.7831	-0.37734	0.9814	8	-0.00263898	0.00752543	14.7252	-0.350674	0.984607	6	-0.0148404	0.00941964	27.6277	-1.57547	0.408543	6	-0.03557	0.010713	81.9334	-3.32026	0.00721653		NS3 - SF1	8	0.0284403	0.0183796	28.5211	1.54738	0.423716	8	-0.0058999	0.0143158	46.5356	-0.412125	0.976116	6	0.0258156	0.00769238	51.1636	3.356	0.00791237	6	0.013934	0.0140665	42.2297	0.990583
LM19 - LM62	10	-0.00713179	0.00448333	90.5155	-1.59073	0.38902	10	-0.00767241	0.00497162	109.359	-1.54324	0.415471	7	-0.0108959	0.00668623	82.6393	-1.6296	0.367865	7	-0.00792385	0.00993168	83.3205	-0.797836	0.855217		LM19 - LM62	10	0.00771243	0.0153671	40.1111	0.50188	0.958159	10	-0.0126601	0.0141348	76.4003	-0.895669	0.807102	7	0.00174242	0.0070556	63.4088	0.246956	0.994656	7	0.00823391	0.014119	33.8568	0.583181
LM19 - NS3	10	0.00811123	0.00514524	36.0506	1.57645	0.404426	10	0.0132573	0.00740116	15.0276	1.79125	0.315148	7	0.0216721	0.00849022	29.3723	2.55259	0.0723012	7	0.019161	0.0104767	85.0697	1.82892	0.267063		LM19 - NS3	10	-0.0260503	0.0149831	43.4045	-1.73865	0.316654	10	0.0182782	0.0149915	35.406	1.21924	0.619005	7	-0.0159048	0.00758127	48.2444	-2.09791	0.168341	7	-0.0189958	0.0136632	47.2416	-1.39029
LM19 - SF1	10	0.00347113	0.00432824	108.723	0.801972	0.853359	10	0.00078933	0.00496593	109.632	0.158949	0.998562	7	0.0141425	0.00720348	61.1299	1.96329	0.213196	7	-0.0111206	0.0112544	55.1073	-0.988111	0.756776		LM19 - SF1	10	0.0601379	0.0161298	28.8892	3.72837	0.00439134	10	0.0136227	0.0123449	94.929	1.10351	0.688262	7	0.0127903	0.00748686	51.6962	1.70837	0.32985	7	-0.011612	0.0137711	37.9337	-0.843217
LM62 - NS3	10	0.015243	0.0052891	37.731	2.88197	0.0315371	10	0.0209297	0.00740463	15.0526	2.82657	0.0553632	7	0.032568	0.00811415	27.3909	4.01373	0.00223134	7	0.0270849	0.0101099	92.3841	2.67905	0.0426615		LM62 - NS3	10	-0.0337627	0.0169076	36.5157	-1.9969	0.20779	10	0.0309383	0.0163088	39.0593	1.89703	0.245927	7	-0.0176473	0.00780905	47.174	-2.25985	0.122295	7	-0.0272297	0.014583	37.9345	-1.86722
LM62 - SF1	10	0.0106029	0.0044983	90.2836	2.35709	0.0929978	10	0.00846174	0.00497111	109.375	1.70218	0.327524	7	0.0250384	0.00675616	64.2105	3.70601	0.00243151	7	-0.00319678	0.0109138	58.1623	-0.292912	0.991161		LM62 - SF1	10	0.0524254	0.0179316	30.2102	2.92363	0.0312653	10	0.0262828	0.0139151	79.0146	1.8888	0.241139	7	0.0110479	0.00771743	49.6312	1.43155	0.486111	7	-0.0198459	0.0146841	31.0067	-1.35152
NS3 - SF1	10	-0.0046401	0.00515828	36.2944	-0.899544	0.805101	10	-0.012468	0.00740082	15.0251	-1.68467	0.365043	7	-0.00752955	0.0085454	29.6045	-0.881123	0.814573	7	-0.0302816	0.011412	64.1551	-2.65349	0.0480987		NS3 - SF1	10	0.0861881	0.0176037	30.1288	4.89603	0.000173626	10	-0.00465551	0.0147845	34.7261	-0.314891	0.988996	7	0.0286952	0.00820078	42.2992	3.49908	0.00590409	7	0.00738378	0.0142465	41.8303	0.518289
LM19 - LM62	13	-0.00505258	0.00440197	75.4951	-1.1478	0.661284	13	-0.00172428	0.0050022	81.7304	-0.344704	0.985821	8	-0.0104881	0.00715362	60.4984	-1.46612	0.464039	8	0.00927239	0.0109126	57.2385	0.849697	0.83041		LM19 - LM62	13	0.0210951	0.0163178	29.529	1.29276	0.574635	13	-0.0273319	0.0156286	59.3715	-1.74884	0.308173	8	0.000595687	0.00720055	56.0838	0.082728	0.999794	8	0.0152876	0.0152707	25.4285	1.00111
LM19 - NS3	13	0.0181515	0.00520227	29.3253	3.48916	0.00799538	13	0.00796274	0.00722876	14.5051	1.10154	0.694216	8	0.0222656	0.00829526	33.8191	2.68413	0.0520111	8	0.0436678	0.01135	58.2596	3.84737	0.00165811		LM19 - NS3	13	0.0595186	0.0146613	43.2229	4.05956	0.00112444	13	0.00674766	0.0165836	24.0971	0.406887	0.976725	8	-0.0270732	0.00805385	39.2031	-3.36152	0.00905091	8	-0.014041	0.0140252	39.437	-1.00112
LM19 - SF1	13	0.00350799	0.00449964	73.4531	0.779615	0.86345	13	0.00653945	0.0049844	82.4903	1.31198	0.55801	8	0.00398044	0.00729069	60.1993	0.545961	0.947285	8	0.0173141	0.0125704	40.542	1.37737	0.520476		LM19 - SF1	13	0.0649964	0.0157692	29.673	4.12173	0.00150253	13	-0.0178081	0.0122455	71.4764	-1.45426	0.470316	8	0.00792754	0.00795115	41.5267	0.997031	0.751904	8	-0.00267354	0.0148736	27.9321	-0.179751
LM62 - NS3	13	0.0232041	0.00517998	28.8207	4.47958	0.000598116	13	0.00968702	0.00723844	14.573	1.33827	0.554692	8	0.0327536	0.0076492	30.6647	4.28197	0.000925175	8	0.0343954	0.0108212	64.9726	3.17852	0.0118649		LM62 - NS3	13	0.0384235	0.0170587	30.0209	2.25243	0.132371	13	0.0340796	0.0194117	29.118	1.75562	0.314564	8	-0.0276688	0.00808224	39.8326	-3.42341	0.00757522	8	-0.0293286	0.01517	30.1179	-1.93333
LM62 - SF1	13	0.00856057	0.00447385	74.2147	1.91347	0.231291	13	0.00826373	0.00499843	81.8781	1.65326	0.355045	8	0.0144685	0.00654622	71.1976	2.21021	0.130333	8	0.00804171	0.012095	42.8054	0.664877	0.909679		LM62 - SF1	13	0.0439013	0.0180198	27.4974	2.43629	0.0936287	13	0.0095238	0.0158666	56.1045	0.60024	0.931558	8	0.00733185	0.00797991	41.9023	0.918788	0.794966	8	-0.0179612	0.0159576	23.4858	-1.12556
NS3 - SF1	13	-0.0146435	0.00526323	30.1259	-2.78224	0.0433277	13	-0.00142329	0.00722615	14.4855	-0.196964	0.997166	8	-0.0182851	0.00777754	31.5118	-2.35102	0.107997	8	-0.0263537	0.0124911	45.9491	-2.10979	0.165253		NS3 - SF1	13	0.00547784	0.0165347	28.2039	0.331294	0.987189	13	-0.0245558	0.0168081	24.3161	-1.46095	0.475405	8	0.0350007	0.0087576	34.9731	3.99661	0.0017188	8	0.0113674	0.0147702	33.5015	0.769622
LM19 - LM62	15	-0.0071868	0.00447118	49.3808	-1.60736	0.383966	15	-0.00361847	0.00503806	54.5725	-0.718227	0.889426	11	-0.0111858	0.0107938	31.6771	-1.03631	0.729663	10	0.00237338	0.0136579	29.5643	0.173773	0.998092		LM19 - LM62	15	0.0100016	0.0170278	23.6844	0.587366	0.934913	15	-0.0048306	0.0174033	43.0048	-0.277568	0.992423	11	-0.0219156	0.00962529	31.7769	-2.27688	0.125003	10	-0.0053599	0.0180795	15.3116	-0.296463
LM19 - NS3	15	0.0103254	0.0053435	23.2659	1.93232	0.242398	15	0.00865343	0.00712252	13.4264	1.21494	0.628385	11	0.020048	0.0101681	36.4357	1.97166	0.217299	10	0.00363137	0.014069	28.8212	0.258112	0.993836		LM19 - NS3	15	0.0402059	0.0145667	35.7753	2.76013	0.0429195	15	0.0604704	0.0183714	20.2751	3.29154	0.0174103	11	-0.032523	0.0110469	29.4934	-2.94409	0.0301379	10	-0.0229551	0.0157182	18.6627	-1.46042
LM19 - SF1	15	-0.000604448	0.00472774	46.2862	-0.127851	0.999242	15	0.00266933	0.00501233	55.115	0.532553	0.950771	11	0.0158289	0.0100654	33.622	1.5726	0.407426	10	0.0228588	0.0157251	25.9245	1.45365	0.478845		LM19 - SF1	15	0.0532325	0.0156394	26.6306	3.40373	0.0107073	15	0.0119983	0.0133156	40.9833	0.901071	0.804298	11	0.00509957	0.0109423	30.1983	0.466042	0.965901	10	-0.00135543	0.017617	15.9951	-0.0769388
LM62 - NS3	15	0.0175122	0.00521216	21.8469	3.35987	0.0140253	15	0.0122719	0.00713649	13.5164	1.7196	0.351705	11	0.0312338	0.00894442	33.6799	3.49199	0.00709869	10	0.00125798	0.0133366	30.1899	0.0943258	0.999692		LM62 - NS3	15	0.0302044	0.0172631	24.2793	1.74965	0.32109	15	0.065301	0.0219017	25.0372	2.98155	0.0300488	11	-0.0106074	0.0106273	28.5015	-0.99812	0.75166	10	-0.0175952	0.0171862	16.2944	-1.0238
LM62 - SF1	15	0.00658236	0.00457877	48.5585	1.43758	0.482605	15	0.0062878	0.00503215	54.6888	1.24953	0.598512	11	0.0270147	0.00882756	32.5648	3.06027	0.0217647	10	0.0204854	0.0150734	26.5873	1.35904	0.535021		LM62 - SF1	15	0.0432309	0.0181774	23.5297	2.37828	0.109138	15	0.0168289	0.017874	40.3664	0.94153	0.782762	11	0.0270152	0.0105186	29.1597	2.56832	0.0700684	10	0.00400447	0.0189384	14.7587	0.211447
NS3 - SF1	15	-0.0109298	0.00543384	24.0897	-2.01143	0.211679	15	-0.0059841	0.00711834	13.3976	-0.840659	0.834314	11	-0.00421911	0.0080504	25.9618	-0.524087	0.9525	10	0.0192275	0.0154469	26.7152	1.24475	0.604777		NS3 - SF1	15	0.0130266	0.0158953	23.5492	0.819525	0.84465	15	-0.0484722	0.0188179	20.7277	-2.57585	0.0771015	11	0.0376226	0.0118334	28.2098	3.17937	0.0176843	10	0.0215997	0.016699	17.1762	1.29347
[truncated: 51 more columns]

## Sheet: Table S6
Table S6. Pairwise comparisons test using mixed models for determining the significant differences between the means of four wheat genotypes for canopy temperature. S6.1 Difference between canopy average- and air temperature measured in the thermal IR imaging unit (ΔT) in Figure 6A. S6.2 Growth models for water use efficiency (WUE) in Figure 6B under different treatments in different time points.…
Table S6.1. Analysis of difference between canopy average- and air temperature measured in the thermal IR imaging unit (ΔT) of four wheat genotypes under different treatments in different time points.																										Table S6.2. Analysis of growth models for water use efficiency (WUE) of four wheat genotypes under different treatments in different time points.
Treatments	Control						Drought						Heat						Combined							Treatments	Control						Drought						Heat						Combined
contrast	Days.after.inducing.stress	estimate	SE	df	t.ratio	p.value	Days.after.inducing.stress	estimate	SE	df	t.ratio	p.value	Days.after.inducing.stress	estimate	SE	df	t.ratio	p.value	Days.after.inducing.stress	estimate	SE	df	t.ratio	p.value		contrast	Days.after.inducing.stress	estimate	SE	df	t.ratio	p.value	Days.after.inducing.stress	estimate	SE	df	t.ratio	p.value	Days.after.inducing.stress	estimate	SE	df	t.ratio	p.value	Days.after.inducing.stress	estimate	SE	df	t.ratio
LM19 - LM62	1	-1.51288	0.459448	58.0416	-3.29281	0.00893545	1	0.620182	0.529578	91.0654	1.17109	0.646539	1	1.41327	0.602749	56.4641	2.34471	0.100082	1	0.232297	0.768014	28.4733	0.302464	0.99018		LM19 - LM62	3	-0.162233	0.0861804	10.7698	-1.88248	0.290454	3	-0.180023	0.720412	21.0515	-0.249889	0.994351	3	0.0237593	0.0225749	23.506	1.05247	0.720884	3	-0.283256	0.375919	17.113	-0.753504
LM19 - NS3	1	-1.36921	0.438369	79.5412	-3.12342	0.0130529	1	0.0969662	0.54058	67.7442	0.179374	0.99793	1	-0.760448	0.615368	52.1467	-1.23576	0.607279	1	-1.95171	0.83114	25.3804	-2.34823	0.113612		LM19 - NS3	3	-0.223865	0.0932806	13.4477	-2.39991	0.124559	3	-0.529113	0.626684	21.0985	-0.844305	0.832774	3	0.000613282	0.0333314	21.7189	0.0183995	0.999998	3	-0.866529	0.269361	23.1362	-3.21698
LM19 - SF1	1	-1.12902	0.429415	79.6564	-2.62921	0.0493698	1	0.439206	0.523529	94.6813	0.838934	0.835763	1	-0.601853	0.531169	89.0788	-1.13307	0.670174	1	0.75961	0.79919	26.8342	0.950474	0.778103		LM19 - SF1	3	-0.102015	0.121314	16.4742	-0.840914	0.834298	3	0.0186851	0.623707	20.9825	0.0299582	0.99999	3	-0.0719514	0.0234516	23.926	-3.06807	0.0253883	3	-0.572328	0.284333	25.2766	-2.01288
LM62 - NS3	1	0.143666	0.481356	55.1469	0.29846	0.990655	1	-0.523215	0.54787	70.6536	-0.954999	0.775218	1	-2.17372	0.678116	45.1862	-3.20553	0.0127642	1	-2.18401	0.737612	33.1136	-2.96092	0.0274714		LM62 - NS3	3	-0.0616316	0.0467624	11.5687	-1.31797	0.570256	3	-0.349089	0.617668	20.2565	-0.565173	0.941254	3	-0.023146	0.0293354	19.3986	-0.789012	0.858539	3	-0.583273	0.349518	14.7084	-1.66879
LM62 - SF1	1	0.383855	0.473216	55.415	0.811161	0.848929	1	-0.180975	0.531053	95.0488	-0.340786	0.986299	1	-2.01512	0.602746	56.4613	-3.34324	0.00782252	1	0.527313	0.701415	39.0421	0.751785	0.875348		LM62 - SF1	3	0.0602186	0.0905678	10.592	0.664901	0.907992	3	0.198708	0.614647	20.0062	0.323288	0.987966	3	-0.0957107	0.0173079	22.3157	-5.52988	7.79601e-05	3	-0.289072	0.361182	15.7536	-0.800349
NS3 - SF1	1	0.240189	0.452778	71.0828	0.530478	0.95139	1	0.34224	0.542025	71.3508	0.631411	0.921585	1	0.158596	0.615366	52.1446	0.257726	0.993925	1	2.71132	0.77002	30.655	3.5211	0.00709864		NS3 - SF1	3	0.12185	0.0973485	13.0677	1.25169	0.607073	3	0.547798	0.501528	38.2556	1.09226	0.696327	3	-0.0725647	0.0300154	20.5794	-2.41758	0.104964	3	0.294201	0.24838	35.593	1.18448
LM19 - LM62	3	-0.96327	0.453503	77.0407	-2.12407	0.154663	3	-0.244045	0.528472	125.302	-0.461794	0.967189	3	0.822218	0.570747	83.9355	1.4406	0.477926	3	0.342665	0.750779	36.5383	0.456413	0.967949		LM19 - LM62	6	-0.0956219	0.0811646	10.5314	-1.17812	0.652451	6	-0.512309	0.733269	26.9958	-0.698665	0.896687	5	0.0125964	0.0181473	25.4728	0.694122	0.898384	5	-0.380552	0.365281	23.3262	-1.04181
LM19 - NS3	3	-1.34025	0.433775	110.354	-3.08972	0.0133356	3	-0.343955	0.545089	88.276	-0.631008	0.92179	3	-1.05697	0.582219	74.9626	-1.81541	0.27426	3	-1.30861	0.78755	32.6607	-1.66162	0.359745		LM19 - NS3	6	-0.210559	0.0911157	14.1101	-2.3109	0.142236	6	-0.968873	0.626792	34.4964	-1.54577	0.422197	5	-0.00969938	0.0283744	21.6953	-0.341835	0.98588	5	-1.00422	0.317271	29.5423	-3.16517
LM19 - SF1	3	0.438428	0.427063	110.557	1.02661	0.73424	3	-0.342708	0.523412	130.247	-0.654757	0.913708	3	0.532073	0.510841	153.536	1.04156	0.725302	3	0.392686	0.758272	35.2034	0.51787	0.954253		LM19 - SF1	6	-0.100691	0.114081	16.2526	-0.882626	0.813793	6	0.121244	0.645254	34.8731	0.187901	0.997601	5	-0.0393521	0.0193826	27.4046	-2.03028	0.201739	5	-0.925139	0.295095	27.6756	-3.13505
LM62 - NS3	3	-0.376976	0.47024	72.3721	-0.801667	0.853418	3	-0.09991	0.54926	91.554	-0.181899	0.997848	3	-1.87918	0.635429	61.6104	-2.95735	0.0222325	3	-1.65127	0.723147	43.2866	-2.28345	0.117766		LM62 - NS3	6	-0.114937	0.0510174	12.2489	-2.2529	0.163254	6	-0.456563	0.67412	26.2515	-0.677273	0.904768	5	-0.0222958	0.0249339	18.6356	-0.894198	0.807918	5	-0.623664	0.343825	23.1863	-1.8139
LM62 - SF1	3	1.4017	0.464055	73.0411	3.02054	0.0178755	3	-0.0986629	0.527755	131.953	-0.186948	0.997671	3	-0.290144	0.570746	83.9323	-0.50836	0.956887	3	0.0500214	0.691146	51.3271	0.0723745	0.999862		LM62 - SF1	6	-0.00506894	0.0855288	10.3381	-0.0592659	0.99992	6	0.633553	0.69132	27.2224	0.91644	0.796301	5	-0.0519485	0.0138664	26.4534	-3.74637	0.00461122	5	-0.544587	0.323475	20.5503	-1.68355
NS3 - SF1	3	1.77867	0.444796	97.8514	3.99885	0.000704613	3	0.00124702	0.544394	92.3772	0.00229067	1	3	1.58904	0.582217	74.9603	2.72929	0.0387135	3	1.70129	0.730924	42.2709	2.32759	0.107837		NS3 - SF1	6	0.109868	0.095024	13.6676	1.15622	0.662732	6	1.09012	0.577155	52.0934	1.88878	0.245349	5	-0.0296527	0.0258469	20.7757	-1.14725	0.665376	5	0.0790774	0.26808	46.4819	0.294977
LM19 - LM62	6	-1.32029	0.446842	112.727	-2.95471	0.0196545	6	-0.279784	0.527922	176.87	-0.529973	0.9517	5	-0.979527	0.544632	125.824	-1.79851	0.278894	5	-0.176145	0.738732	44.0461	-0.238443	0.99516		LM19 - LM62	8	-0.1207	0.0780288	10.3872	-1.54686	0.446611	8	-0.941534	0.821547	25.1446	-1.14605	0.665212	6	0.0409318	0.0161264	26.6393	2.53819	0.0766307	6	-0.320496	0.375768	25.2726	-0.85291
LM19 - NS3	6	0.507005	0.429297	162.011	1.18101	0.6397	6	-0.929552	0.552846	116.085	-1.6814	0.338145	5	-1.80492	0.55471	109.229	-3.25381	0.00814033	5	-1.11327	0.746933	42.9854	-1.49046	0.451967		LM19 - NS3	8	-0.216008	0.0899795	14.5695	-2.40063	0.120893	8	-1.82591	0.719551	33.4417	-2.53757	0.0721586	6	0.0249676	0.0259433	21.4908	0.96239	0.771801	6	-1.16152	0.355566	28.5488	-3.26668
LM19 - SF1	6	0.111729	0.426036	160.967	0.262252	0.99366	6	-0.702787	0.524359	181.586	-1.34028	0.538556	5	-0.116042	0.498199	230.986	-0.232922	0.995539	5	0.0140987	0.72075	47.0447	0.0195612	0.999997		LM19 - SF1	8	-0.117838	0.109269	16.0173	-1.07841	0.707115	8	-0.641341	0.747915	33.3723	-0.857506	0.826445	6	-0.0332274	0.0175905	29.7275	-1.88894	0.254293	6	-1.06093	0.319238	25.8869	-3.32331
LM62 - NS3	6	1.82729	0.455415	107.002	4.01237	0.000638267	6	-0.649768	0.552403	118.988	-1.17626	0.642976	5	-0.825396	0.596761	87.6124	-1.38313	0.513236	5	-0.937129	0.714173	51.3527	-1.31219	0.559537		LM62 - NS3	8	-0.0953081	0.0542266	12.6473	-1.75759	0.33656	8	-0.884375	0.79237	25.7916	-1.11611	0.683094	6	-0.0159642	0.0228724	18.0629	-0.697965	0.896525	6	-0.841026	0.35771	28.2328	-2.35114
LM62 - SF1	6	1.43202	0.452342	107.914	3.16579	0.0106775	6	-0.423003	0.523892	188.25	-0.807424	0.850892	5	0.863485	0.544631	125.822	1.58545	0.390596	5	0.190244	0.686742	58.2801	0.277024	0.992496		LM62 - SF1	8	0.00286209	0.082365	10.1816	0.0347489	0.999984	8	0.300192	0.818213	26.6277	0.366887	0.982756	6	-0.0741591	0.0126301	28.771	-5.87164	1.33739e-05	6	-0.740432	0.321624	24.0725	-2.30217
NS3 - SF1	6	-0.395276	0.435019	148.466	-0.90864	0.800268	6	0.226765	0.548999	119.42	0.413052	0.976135	5	1.68888	0.554709	109.227	3.04462	0.0152539	5	1.12737	0.695557	59.6234	1.62082	0.374933		NS3 - SF1	8	0.0981702	0.0937646	14.0977	1.04699	0.725611	8	1.18457	0.715743	40.1735	1.65502	0.360418	6	-0.058195	0.0239273	20.8095	-2.43216	0.101765	6	0.100594	0.297771	40.9676	0.337823
LM19 - LM62	8	-1.09733	0.443959	137.072	-2.47169	0.0689625	8	-0.435525	0.528296	199.853	-0.824396	0.842866	6	-0.0794643	0.534059	151.199	-0.148793	0.998821	6	-0.678944	0.734738	46.5469	-0.924063	0.792136		LM19 - LM62	10	-0.105984	0.0750839	10.2684	-1.41155	0.519768	10	-0.515887	0.955003	23.0942	-0.540195	0.948242	7	0.0289737	0.014308	28.0393	2.025	0.203061	7	-0.332391	0.395957	25.2996	-0.839462
LM19 - NS3	8	-0.604975	0.42796	187.553	-1.41362	0.492428	8	-1.14774	0.558658	126.245	-2.05446	0.173925	6	0.495002	0.543346	130.422	0.911024	0.799005	6	-0.774135	0.727896	49.5427	-1.06352	0.713054		LM19 - NS3	10	-0.26015	0.0891002	15.0204	-2.91974	0.0465442	10	-2.68763	0.86167	29.0726	-3.11909	0.0200695	7	0.00657502	0.0235569	21.0824	0.279112	0.99218	7	-1.40625	0.400004	27.0447	-3.51558
LM19 - SF1	8	-0.656969	0.427027	185.149	-1.53847	0.416688	8	1.37389	0.525734	203.001	2.61327	0.0471206	6	1.45111	0.494958	258.095	2.93179	0.0191255	6	1.63874	0.703434	54.4605	2.32962	0.103835		LM19 - SF1	10	-0.0729789	0.104467	15.6968	-0.698582	0.896096	10	-1.59107	0.895677	29.0381	-1.77639	0.30476	7	-0.0397741	0.016034	31.8175	-2.48061	0.0824836	7	-1.10502	0.352922	24.3744	-3.13106
LM62 - NS3	8	0.492355	0.446861	133.674	1.10181	0.689046	8	-0.712216	0.555193	128.194	-1.28283	0.575512	6	0.574466	0.579189	105.37	0.991846	0.754387	6	-0.0951916	0.711816	53.0792	-0.133731	0.999135		LM62 - NS3	10	-0.154165	0.0576764	13.0015	-2.67294	0.079312	10	-2.17174	0.949262	24.7506	-2.28782	0.128257	7	-0.0223987	0.0209409	17.4125	-1.06961	0.711866	7	-1.07385	0.381452	30.6546	-2.81517
LM62 - SF1	8	0.440361	0.445968	134.032	0.987428	0.756848	8	1.80941	0.522051	213.739	3.46597	0.00354719	6	1.53058	0.534058	151.198	2.86594	0.0242903	6	2.31768	0.686781	58.1871	3.3747	0.00703834		LM62 - SF1	10	0.0330054	0.0793794	10.0468	0.415793	0.974508	10	-1.07518	0.980235	25.2957	-1.09686	0.694626	7	-0.0687478	0.011861	29.726	-5.7961	1.46309e-05	7	-0.772628	0.331748	26.5673	-2.32896
NS3 - SF1	8	-0.0519936	0.430043	180.401	-0.120903	0.999366	8	2.52163	0.552756	128.244	4.56192	6.85693e-05	6	0.95611	0.543346	130.421	1.75967	0.297539	6	2.41287	0.679457	70.7653	3.55118	0.0037549		NS3 - SF1	10	0.187171	0.0927489	14.5365	2.01804	0.22626	10	1.09656	0.889553	33.049	1.23271	0.610999	7	-0.0463491	0.0221561	20.7766	-2.09193	0.188545	7	0.301226	0.336568	35.7044	0.894994
LM19 - LM62	10	0.42984	0.442353	155.913	0.971713	0.765731	10	0.275277	0.529262	209.458	0.520114	0.954188	7	2.3775	0.52528	177.15	4.52615	6.45528e-05	7	-2.3967	0.732128	47.6963	-3.27361	0.010326		LM19 - LM62	13	-0.10825	0.071076	10.1629	-1.52302	0.459785	13	0.0767061	1.20618	21.4737	0.0635944	0.999905	8	0.0235694	0.012779	30.1579	1.84439	0.273106	8	-0.387589	0.424467	24.1086	-0.913121
LM19 - NS3	10	0.186837	0.427958	198.276	0.436579	0.972082	10	-0.167887	0.564965	126.959	-0.297164	0.990834	7	1.12699	0.533716	153.072	2.11159	0.154022	7	-0.809834	0.709799	57.0644	-1.14093	0.66598		LM19 - NS3	13	-0.327111	0.0882792	15.6175	-3.70542	0.00963151	13	-5.60442	1.1255	24.8693	-4.9795	0.000220389	8	-0.0112229	0.0212303	20.4023	-0.528627	0.951135	8	-1.83923	0.448763	25.6337	-4.09844
LM19 - SF1	10	-0.101856	0.429351	194.404	-0.237232	0.995288	10	1.19085	0.527699	211.04	2.25668	0.111696	7	1.83428	0.493833	272.807	3.71436	0.00140387	7	-0.445964	0.68718	62.8158	-0.648978	0.915522		LM19 - SF1	13	-0.0846825	0.0972848	15.0226	-0.870459	0.819861	13	-2.95261	1.1635	24.9468	-2.53771	0.0782303	8	-0.047567	0.0147877	32.0414	-3.21666	0.0149179	8	-0.902392	0.393706	23.2763	-2.29204
LM62 - NS3	10	-0.243003	0.439443	158.516	-0.552978	0.945623	10	-0.443164	0.558531	128.043	-0.793445	0.85731	7	-1.25051	0.56294	126.443	-2.22139	0.123025	7	1.58687	0.710899	52.8698	2.2322	0.127833		LM62 - NS3	13	-0.218861	0.0632154	13.4224	-3.46215	0.0185687	13	-5.68113	1.22399	23.3722	-4.64147	0.000595008	8	-0.0347923	0.0191787	16.7983	-1.81411	0.301314	8	-1.45164	0.413358	29.9527	-3.51182
LM62 - SF1	10	-0.531696	0.440801	157.312	-1.20621	0.623836	10	0.915569	0.520805	226.446	1.75799	0.296456	7	-0.543223	0.52528	177.15	-1.03416	0.72964	7	1.95074	0.688316	55.9414	2.83407	0.0314861		LM62 - SF1	13	0.0235673	0.0752816	9.90707	0.313055	0.988718	13	-3.02932	1.25902	23.6645	-2.40609	0.10326	8	-0.0711364	0.0116522	28.1702	-6.10496	7.72884e-06	8	-0.514802	0.352818	26.7058	-1.45911
NS3 - SF1	10	-0.288693	0.426353	201.902	-0.677123	0.905675	10	1.35873	0.55705	127.91	2.43916	0.0749206	7	0.707285	0.533716	153.071	1.32521	0.548353	7	0.363869	0.664516	83.311	0.54757	0.946957		NS3 - SF1	13	0.242428	0.0916992	15.162	2.64374	0.0772901	13	2.65181	1.18196	27.4987	2.24358	0.136694	8	-0.0363441	0.0205717	20.6457	-1.7667	0.316873	8	0.936837	0.381703	31.6636	2.45436
LM19 - LM62	13	-1.38073	0.442364	162.639	-3.12126	0.0113466	13	0.887978	0.531813	200.938	1.66972	0.342445	8	1.41352	0.518388	200.983	2.72675	0.0348415	8	-3.18708	0.730919	47.3535	-4.36038	0.000394108		LM19 - LM62	15	-0.0986089	0.0687142	10.1538	-1.43506	0.507088	15	-1.93652	1.39339	20.8904	-1.38979	0.519258	10	0.0153768	0.0110563	40.9708	1.39077	0.51221	9	-0.0649131	0.459751	22.6344	-0.141192
LM19 - NS3	13	-0.998336	0.430453	186.502	-2.31927	0.0973263	13	1.46888	0.575317	112.903	2.55317	0.0573243	8	0.303789	0.525915	175.453	0.577638	0.938673	8	-1.99848	0.692715	65.4051	-2.885	0.0265401		LM19 - NS3	15	-0.379821	0.088071	15.9114	-4.31267	0.00274161	15	-8.50349	1.31949	23.2822	-6.44451	7.56559e-06	10	-0.0261565	0.0168549	18.0174	-1.55187	0.42919	9	-2.14353	0.500582	24.4279	-4.28208
LM19 - SF1	13	0.769561	0.435285	179.274	1.76795	0.292227	13	3.62425	0.531738	200.984	6.81586	6.40898e-10	8	2.13247	0.494838	277.026	4.30943	0.000133283	8	-0.79521	0.672064	71.8607	-1.18323	0.639331		LM19 - SF1	15	-0.11239	0.0925132	14.4188	-1.21485	0.627712	15	-5.49335	1.35874	23.3937	-4.04298	0.00258745	10	-0.0373765	0.0135508	23.2091	-2.75826	0.050763	9	-1.11664	0.439618	22.4221	-2.54002
LM62 - NS3	13	0.382396	0.430575	180.7	0.888106	0.811045	13	0.580904	0.564541	113.878	1.02898	0.732836	8	-1.10973	0.548133	150.039	-2.02456	0.183591	8	1.1886	0.711429	50.9194	1.67072	0.349512		LM62 - NS3	15	-0.281212	0.0671043	13.6147	-4.19067	0.00468106	15	-6.56697	1.42162	22.6279	-4.61936	0.000673216	10	-0.0415333	0.0163765	16.5725	-2.53614	0.0905508	9	-2.07862	0.4517	27.8138	-4.60177
LM62 - SF1	13	2.15029	0.435405	174.418	4.9386	1.08563e-05	13	2.73628	0.52006	227.345	5.26146	1.96627e-06	8	0.71895	0.518389	200.985	1.38689	0.509025	8	2.39187	0.691338	52.2365	3.45977	0.00580257		LM62 - SF1	15	-0.0137811	0.0728366	9.86747	-0.189206	0.997433	15	-3.55683	1.45812	22.8452	-2.43933	0.0977059	10	-0.0527533	0.0129509	22.1686	-4.07332	0.00260675	9	-1.05172	0.383033	25.1584	-2.74578
NS3 - SF1	13	1.7679	0.423299	207.226	4.17648	0.000253515	13	2.15537	0.564471	113.817	3.81839	0.00123939	8	1.82868	0.525916	175.454	3.47713	0.00354445	8	1.20327	0.650814	96.5828	1.84888	0.257144		NS3 - SF1	15	0.267431	0.0913238	15.5133	2.92838	0.0448182	15	3.01014	1.38767	25.4184	2.1692	0.159118	10	-0.01122	0.0181541	19.8131	-0.618041	0.925098	9	1.02689	0.431191	28.6456	2.38153
LM19 - LM62	15	-0.463846	0.443985	149.761	-1.04473	0.723428	15	1.71347	0.53424	181.565	3.2073	0.0085391	9	2.07703	0.513459	219.88	4.04518	0.000418543	9	-1.62639	0.731117	45.6434	-2.22452	0.131923		LM19 - LM62													11	0.0176518	0.0110724	44.4419	1.59422	0.392255	11	0.0366028	0.545158	20.2951	0.0671417
LM19 - NS3	15	0.0426434	0.433761	163.866	0.0983108	0.999658	15	0.313822	0.582788	97.7266	0.538483	0.949405	9	2.72581	0.520026	195.311	5.24168	2.4477e-06	9	0.125261	0.676721	74.1572	0.1851	0.99773		LM19 - NS3													11	-0.0263229	0.0148881	16.3265	-1.76805	0.322917	11	-2.42039	0.610245	22.5656	-3.96626
LM19 - SF1	15	1.05358	0.440821	154.395	2.39005	0.0832446	15	4.00718	0.535146	180.841	7.488	1.78518e-11	9	2.0898	0.49796	272.332	4.19674	0.000213927	9	-0.0601131	0.658166	81.0838	-0.0913343	0.999725		LM19 - SF1													11	-0.0331808	0.0136741	18.3279	-2.42654	0.106924	11	-0.274438	0.541489	21.0689	-0.506821
LM62 - NS3	15	0.506489	0.426241	178.971	1.18827	0.635049	15	-1.39965	0.569201	99.1352	-2.45897	0.0728821	9	0.648777	0.534887	174.151	1.21292	0.619493	9	1.75165	0.713403	47.7039	2.45534	0.0803896		LM62 - NS3													11	-0.0439747	0.0154681	17.5856	-2.84293	0.0490093	11	-2.45699	0.54203	23.7241	-4.53294
LM62 - SF1	15	1.51743	0.433424	167.752	3.50103	0.00329947	15	2.29371	0.520316	215.973	4.4083	9.62822e-05	9	0.0127708	0.51346	219.885	0.0248721	0.999994	9	1.56627	0.695827	47.7949	2.25095	0.124359		LM62 - SF1													11	-0.0508326	0.0143035	20.0705	-3.55387	0.00983892	11	-0.311041	0.463259	21.5546	-0.67142
NS3 - SF1	15	1.01094	0.422944	192.34	2.39025	0.0823617	15	3.69335	0.570051	99.1626	6.47898	2.1692e-08	9	-0.636006	0.520027	195.315	-1.22302	0.612991	9	-0.185374	0.638431	109.382	-0.290359	0.991429		NS3 - SF1													11	-0.00685797	0.0174255	18.8951	-0.39356	0.978715	11	2.14595	0.53834	24.6497	3.98623
LM19 - LM62	16	0.134095	0.445275	139.046	0.301151	0.990473	16	1.65384	0.535669	168.312	3.08743	0.0125213	10	0.593948	0.510548	230.935	1.16335	0.65056	10	-0.398047	0.73272	42.8909	-0.543246	0.947862
LM19 - NS3	16	-0.19536	0.435897	149.61	-0.448179	0.969887	16	1.2304	0.586689	89.552	2.0972	0.161915	10	0.122315	0.516114	209.738	0.236992	0.995303	10	2.49892	0.661896	82.5235	3.7754	0.00167881
LM19 - SF1	16	0.477657	0.444047	139.61	1.07569	0.704904	16	3.95835	0.537061	167.261	7.3704	4.47119e-11	10	1.02679	0.503159	257.858	2.04069	0.17587	10	-0.328799	0.645564	89.6318	-0.50932	0.956674
LM62 - NS3	16	-0.329455	0.424562	172.228	-0.775988	0.865232	16	-0.423436	0.571722	91.1441	-0.740633	0.880401	10	-0.471634	0.523321	195.387	-0.901231	0.804182	10	2.89697	0.716807	43.7713	4.04149	0.00117185
LM62 - SF1	16	0.343562	0.432925	158.753	0.793583	0.857276	16	2.30451	0.520669	205.541	4.42606	9.13068e-05	10	0.432846	0.51055	230.946	0.847803	0.831482	10	0.0692486	0.701755	43.1661	0.0986791	0.99965
NS3 - SF1	16	0.673018	0.423274	179.709	1.59003	0.386888	16	2.72795	0.573026	91.2018	4.7606	4.23403e-05	10	0.904479	0.516116	209.747	1.75247	0.299409	10	-2.82772	0.627446	120.015	-4.50672	9.00264e-05
LM19 - LM62	17	-1.04375	0.446882	126.533	-2.33563	0.0954499	17	1.83614	0.537239	153.297	3.41773	0.00445227	11	-0.0483547	0.509691	230.929	-0.0948707	0.999693	11	-0.845688	0.735719	39.4978	-1.14947	0.661579
LM19 - NS3	17	-0.465297	0.43835	134.35	-1.06147	0.713481	17	0.891604	0.590695	81.4006	1.50941	0.436639	11	-0.640126	0.514224	215.012	-1.24484	0.599049	11	0.741702	0.648321	89.2362	1.14404	0.663392
LM19 - SF1	17	0.279794	0.447569	124.385	0.625141	0.923827	17	2.25028	0.539114	152	4.17404	0.000290803	11	-0.337627	0.510373	232.4	-0.661529	0.911385	11	0.378613	0.634336	96.2636	0.596866	0.932788
LM62 - NS3	17	0.578453	0.423216	161.732	1.36681	0.521989	17	-0.944534	0.574368	83.0938	-1.64448	0.35971	11	-0.591771	0.513548	209.371	-1.15232	0.657525	11	1.58739	0.721624	39.5863	2.19975	0.140951
LM62 - SF1	17	1.32354	0.432757	146.675	3.0584	0.0139369	17	0.414143	0.521173	191.631	0.794636	0.856815	11	-0.289272	0.509693	230.949	-0.567541	0.941616	11	1.2243	0.709086	38.6893	1.72659	0.324157
NS3 - SF1	17	0.745091	0.423941	164.267	1.75753	0.297668	17	1.35868	0.576122	83.1732	2.35832	0.0933749	11	0.302499	0.514226	215.029	0.588262	0.935549	11	-0.363089	0.617932	126.481	-0.587587	0.935671
LM19 - LM62	18	0.814351	0.448801	113.14	1.8145	0.271918	18	0.0513851	0.53895	137.231	0.095343	0.999688	12	1.86686	0.510898	217.347	3.65407	0.00182693	12	-0.46829	0.740098	35.8341	-0.63274	0.920783
LM19 - NS3	18	0.77344	0.441113	118.874	1.75338	0.30109	18	-0.233998	0.594807	73.5037	-0.393402	0.979195	12	0.326979	0.514378	207.552	0.635679	0.920388	12	-1.29109	0.636075	92.6754	-2.02978	0.184602
LM19 - SF1	18	1.19498	0.45138	109.482	2.6474	0.0453341	18	0.436125	0.541303	135.799	0.805694	0.851663	12	0.715184	0.519518	198.112	1.37663	0.515493	12	1.10004	0.624554	99.4427	1.76132	0.298128
LM62 - NS3	18	-0.0409107	0.422203	148.106	-0.0968981	0.999673	18	-0.285384	0.577138	75.1985	-0.494481	0.960086	12	-1.53988	0.505673	211.794	-3.04521	0.0138534	12	-0.822799	0.727823	35.4712	-1.13049	0.673443
LM62 - SF1	18	0.380634	0.432919	132.457	0.879227	0.815621	18	0.38474	0.521826	174.592	0.737295	0.881925	12	-1.15167	0.5109	217.378	-2.2542	0.112217	12	1.56833	0.717777	34.5391	2.18498	0.147607
NS3 - SF1	18	0.421545	0.424944	146.923	0.992001	0.754215	18	0.670123	0.579336	75.2945	1.15671	0.655765	12	0.388205	0.514381	207.579	0.754703	0.874572	12	2.39113	0.609959	126.878	3.92015	0.000821255
LM19 - LM62	19	-1.85981	0.45103	99.7159	-4.12348	0.000443881	19	-0.0920605	0.540801	120.914	-0.17023	0.998237	13	0.988641	0.514154	191.097	1.92285	0.22192	13	-0.0410542	0.745832	32.1809	-0.0550448	0.999939
LM19 - NS3	19	-0.329884	0.444182	103.898	-0.742679	0.879574	19	0.364683	0.599021	66.0286	0.608799	0.928937	13	1.79166	0.516575	186.724	3.46834	0.00360649	13	0.124988	0.625236	91.369	0.199906	0.997152
LM19 - SF1	19	-0.0821285	0.455474	95.4833	-0.180314	0.997904	19	1.06552	0.543628	119.471	1.96002	0.209078	13	1.27467	0.530493	160.926	2.4028	0.0806033	13	1.08161	0.616289	97.7437	1.75504	0.301325
LM62 - NS3	19	1.52993	0.421528	132.347	3.62948	0.0022635	19	0.456744	0.580029	67.6282	0.78745	0.859903	13	0.803015	0.499784	200.188	1.60672	0.377155	13	0.166042	0.735371	31.616	0.225794	0.995856
LM62 - SF1	19	1.77768	0.433411	117.191	4.10161	0.000437411	19	1.15758	0.522628	155.34	2.21493	0.123713	13	0.286028	0.514157	191.134	0.556305	0.944737	13	1.12267	0.727779	30.7862	1.54259	0.425389
NS3 - SF1	19	0.247756	0.42628	128.8	0.581205	0.937575	19	0.700839	0.582666	67.7392	1.20281	0.627209	13	-0.516986	0.516578	186.759	-1.00079	0.749114	13	0.956624	0.603587	120.13	1.5849	0.391084
LM19 - LM62													14	0.432596	0.519421	157.763	0.832842	0.838778	14	-0.623702	0.75289	28.7206	-0.82841	0.840541
LM19 - NS3													14	0.106819	0.520788	156.922	0.205111	0.996935	14	-0.179974	0.61588	84.82	-0.292222	0.991252
LM19 - SF1													14	1.06953	0.543188	126.86	1.96899	0.205242	14	-0.111547	0.609602	90.623	-0.182984	0.99781
LM62 - NS3													14	-0.325777	0.495953	175.921	-0.656871	0.913012	14	0.443728	0.744226	28.113	0.596228	0.932368
LM62 - SF1													14	0.636934	0.519425	157.8	1.22623	0.611157	14	0.512154	0.739039	27.4434	0.693	0.898882
NS3 - SF1													14	0.962711	0.520792	156.958	1.84855	0.254753	14	0.0684261	0.598868	106.846	0.114259	0.999463
LM19 - LM62													15	1.31217	0.526639	124.55	2.4916	0.0661498	15	0.935947	0.761236	25.5534	1.22951	0.614382
LM19 - NS3													15	1.55485	0.52697	125.292	2.95054	0.0195648	15	1.03991	0.608073	74.0706	1.71017	0.325776
LM19 - SF1													15	1.33015	0.557485	99.0138	2.38598	0.0864418	15	1.33253	0.604545	79.0765	2.20419	0.130996
LM62 - NS3													15	0.242672	0.494227	144.495	0.491012	0.96099	15	0.10396	0.754342	24.9922	0.137816	0.99904
LM62 - SF1													15	0.017971	0.526643	124.582	0.0341238	0.999986	15	0.396587	0.751501	24.4945	0.527727	0.951531
NS3 - SF1													15	-0.224701	0.526974	125.324	-0.426398	0.973863	15	0.292627	0.595841	89.5226	0.491117	0.960886
[truncated: 1 more columns]

## Sheet: Table S7
Table S7. Pairwise comparisons test using mixed models for determining the significant differences between the means of four wheat genotypes for side and top view RGB imaging. S7.1 Leaf area from RGB side view at two angles. S7.2 Leaf area from RGB top view. S7.3 Volume of plants digital biomass in Figure S4 under different treatments in different time points. The p-values below 0.05 are highligh…
Table S7.1. Analysis of leaf area from RGB side view at two angles of four wheat genotypes under different treatments in different time points.																										Table S7.2. Analysis of leaf area from RGB top view of four wheat genotypes under different treatments in different time points.
Treatments	Control						Drought						Heat						Combined							Treatments	Control						Drought						Heat						Combined
contrast	Days.after.inducing.stress	estimate	SE	df	t.ratio	p.value	Days.after.inducing.stress	estimate	SE	df	t.ratio	p.value	Days.after.inducing.stress	estimate	SE	df	t.ratio	p.value	Days.after.inducing.stress	estimate	SE	df	t.ratio	p.value		contrast	Days.after.inducing.stress	estimate	SE	df	t.ratio	p.value	Days.after.inducing.stress	estimate	SE	df	t.ratio	p.value	Days.after.inducing.stress	estimate	SE	df	t.ratio	p.value	Days.after.inducing.stress	estimate	SE	df	t.ratio
LM19 - LM62	1	0.107357	0.105995	301.686	1.01285	0.742043	1	0.252003	0.110272	18.6969	2.28529	0.137393	1	-0.392836	0.135111	9.19053	-2.90752	0.067897	1	-0.354638	0.126054	9.33934	-2.81338	0.0774228		LM19 - LM62	1	0.157525	0.138253	62.4043	1.1394	0.666767	1	0.442803	0.102736	24.9276	4.31012	0.00120419	1	-0.51437	0.109147	18.3285	-4.71266	0.000873616	1	-0.198888	0.157512	10.8212	-1.26268
LM19 - NS3	1	0.676789	0.163165	27.7753	4.14787	0.00154105	1	0.809761	0.151508	12.4776	5.34468	0.000767852	1	1.02325	0.180879	7.85434	5.65712	0.00226504	1	0.845612	0.0919325	8.82204	9.19818	3.9287e-05		LM19 - NS3	1	0.708806	0.169475	18.3945	4.18237	0.00275804	1	0.834959	0.153566	468.882	5.43713	5.2178e-07	1	1.18998	0.207111	8.67154	5.74564	0.0014667	1	1.33204	0.0929079	22.2556	14.3372
LM19 - SF1	1	0.43049	0.125635	41.9084	3.42651	0.00727047	1	0.643814	0.13721	16.7583	4.69218	0.00112825	1	-0.0354741	0.149821	9.25884	-0.236777	0.994998	1	0.223759	0.132443	7.48165	1.68948	0.391258		LM19 - SF1	1	0.482957	0.144473	38.9736	3.34287	0.0095503	1	0.635003	0.11744	13.8879	5.40703	0.000488223	1	0.136733	0.114526	17.1884	1.19391	0.638643	1	0.181557	0.149384	12.8762	1.21537
LM62 - NS3	1	0.569431	0.130067	14.0763	4.378	0.00308802	1	0.557758	0.160248	14.0529	3.4806	0.017017	1	1.41609	0.167824	6.49353	8.43794	0.000422271	1	1.20025	0.11735	8.41424	10.2279	2.34349e-05		LM62 - NS3	1	0.551281	0.153884	15.2364	3.58244	0.0126974	1	0.392156	0.161691	171.879	2.42534	0.0761315	1	1.70435	0.206106	8.45193	8.26931	0.000116751	1	1.53093	0.157786	11.1098	9.70257
LM62 - SF1	1	0.323132	0.0779648	8.8426	4.14459	0.0113847	1	0.391812	0.146804	18.0121	2.66895	0.0680487	1	0.357362	0.133769	8.26766	2.67149	0.103561	1	0.578397	0.151197	9.21436	3.82545	0.0168721		LM62 - SF1	1	0.325431	0.125822	19.7701	2.58644	0.0768613	1	0.1922	0.127882	15.8041	1.50295	0.458902	1	0.651104	0.112698	14.5354	5.7774	0.000216065	1	0.380444	0.196418	15.4118	1.93691
NS3 - SF1	1	-0.246299	0.146514	19.1992	-1.68105	0.360106	1	-0.165947	0.17985	16.5325	-0.922693	0.79323	1	-1.05873	0.179879	7.50111	-5.88578	0.00206155	1	-0.621853	0.124187	6.43296	-5.00738	0.00811121		NS3 - SF1	1	-0.22585	0.159496	15.9327	-1.41602	0.507984	1	-0.199956	0.171411	49.2244	-1.16653	0.650515	1	-1.05325	0.209004	8.84367	-5.03937	0.00335183	1	-1.15048	0.149673	13.4781	-7.68667
LM19 - LM62	3	0.163497	0.10305	249.727	1.58657	0.388139	3	0.239815	0.102594	18.4213	2.3375	0.125597	3	-0.357457	0.12915	9.03377	-2.76777	0.0848843	3	-0.357896	0.117878	9.13551	-3.03617	0.0561327		LM19 - LM62	3	0.14988	0.132385	65.3236	1.13215	0.671153	3	0.29091	0.0958078	24.7321	3.03639	0.0267349	3	-0.519917	0.118432	19.4445	-4.38999	0.00157014	3	-0.277913	0.144881	9.96863	-1.91821
LM19 - NS3	3	0.642247	0.165192	27.2493	3.88788	0.00310896	3	0.740733	0.144519	11.9455	5.12551	0.00125466	3	0.988657	0.177862	7.59961	5.55855	0.0028094	3	0.796306	0.0861413	8.8825	9.24418	3.60898e-05		LM19 - NS3	3	0.671207	0.168788	17.6869	3.97662	0.00459252	3	0.68271	0.145596	573.707	4.68908	2.03556e-05	3	1.15164	0.211248	9.23678	5.4516	0.0017191	3	1.00303	0.0873052	19.4444	11.4887
LM19 - SF1	3	0.508677	0.124139	39.1169	4.09766	0.00112414	3	0.642605	0.12942	16.2447	4.96526	0.000700779	3	-0.0547204	0.144039	9.12252	-0.379899	0.980192	3	0.143473	0.126595	7.34364	1.13332	0.68195		LM19 - SF1	3	0.354465	0.138951	39.5156	2.551	0.0673597	3	0.638239	0.113726	13.3424	5.61205	0.000392742	3	-0.160925	0.119785	19.6515	-1.34345	0.547606	3	0.060469	0.135201	11.8415	0.447253
LM62 - NS3	3	0.478751	0.133978	14.4098	3.57336	0.0138341	3	0.500919	0.153072	13.6001	3.27245	0.0260424	3	1.34611	0.165826	6.33148	8.11765	0.000601137	3	1.1542	0.1096	8.15675	10.531	2.33938e-05		LM62 - NS3	3	0.521327	0.15407	14.8746	3.38371	0.0192627	3	0.3918	0.153895	183.423	2.54589	0.0563571	3	1.67156	0.20811	8.6675	8.03208	0.000126571	3	1.28094	0.150459	11.297	8.51356
LM62 - SF1	3	0.345181	0.0779227	8.59764	4.42978	0.00810598	3	0.402791	0.138906	17.6706	2.89974	0.0436588	3	0.302737	0.128882	8.16416	2.34895	0.164194	3	0.50137	0.143591	9.00632	3.49166	0.0286782		LM62 - SF1	3	0.204585	0.120646	20.0845	1.69575	0.351693	3	0.347329	0.124174	15.6536	2.7971	0.0571908	3	0.358991	0.11416	15.1319	3.14462	0.0301298	3	0.338382	0.182469	15.04	1.85446
NS3 - SF1	3	-0.13357	0.150801	19.597	-0.885736	0.812219	3	-0.0981281	0.172206	16.2118	-0.56983	0.939649	3	-1.04338	0.177667	7.36662	-5.87264	0.00222325	3	-0.652833	0.118926	6.302	-5.48939	0.00532967		NS3 - SF1	3	-0.316742	0.159747	15.8027	-1.98277	0.235554	3	-0.0444709	0.165645	46.8348	-0.268471	0.993139	3	-1.31257	0.208883	8.76704	-6.28374	0.000748435	3	-0.942556	0.141161	13.5858	-6.67717
LM19 - LM62	6	0.169207	0.0992435	142.132	1.70497	0.324916	6	0.319612	0.0916569	17.9888	3.48705	0.0127871	5	-0.36568	0.123569	8.89344	-2.95931	0.0644814	5	-0.368003	0.11064	8.99733	-3.32614	0.0367869		LM19 - LM62	6	0.262404	0.12371	68.9695	2.12113	0.156642	6	0.257024	0.0862455	24.577	2.98015	0.0304508	5	-0.494848	0.128484	20.167	-3.85144	0.00500622	5	-0.31599	0.134079	9.30217	-2.35675
LM19 - NS3	6	0.56787	0.168642	26.5335	3.36732	0.0117318	6	0.723487	0.13457	11.1561	5.3763	0.0010448	5	0.933224	0.175265	7.34108	5.32466	0.00403707	5	0.721588	0.0820343	9.08288	8.79618	4.67962e-05		LM19 - NS3	6	0.582554	0.16823	16.6483	3.46283	0.014605	6	0.706093	0.133954	644.017	5.27115	1.10626e-06	5	1.08367	0.216161	9.8331	5.01327	0.00259155	5	1.00572	0.0861311	16.0214	11.6766
LM19 - SF1	6	0.501974	0.122487	34.3963	4.09819	0.00131564	6	0.654866	0.118156	15.3948	5.54239	0.000269781	5	-0.123433	0.138611	8.99231	-0.890498	0.810006	5	0.0726996	0.12187	7.26361	0.596535	0.930056		LM19 - SF1	6	0.297458	0.130844	39.9363	2.27338	0.121539	6	0.725145	0.1094	12.3966	6.6284	0.000106677	5	-0.242662	0.126291	21.6098	-1.92145	0.248714	5	-0.0428051	0.122674	10.9616	-0.348934
LM62 - NS3	6	0.398663	0.140187	14.952	2.84378	0.0538302	6	0.403875	0.142776	12.9099	2.82874	0.0606551	5	1.2989	0.164306	6.1795	7.90542	0.000784801	5	1.08959	0.102927	8.00995	10.5861	2.56426e-05		LM62 - NS3	6	0.32015	0.154866	14.2741	2.06727	0.210343	6	0.449069	0.142532	192.487	3.15065	0.0101221	5	1.57852	0.210971	8.91581	7.48216	0.000188098	5	1.32171	0.145552	11.8811	9.08068
LM62 - SF1	6	0.332766	0.0788377	8.38014	4.2209	0.0113471	6	0.335254	0.127423	17.1061	2.63102	0.0748691	5	0.242247	0.124465	8.08101	1.9463	0.282272	5	0.440703	0.136808	8.80084	3.22132	0.0440575		LM62 - SF1	6	0.035054	0.113147	20.5773	0.30981	0.98938	6	0.468121	0.11975	15.2404	3.90915	0.00663911	5	0.252186	0.117187	15.5487	2.15199	0.180333	5	0.273185	0.169752	14.7277	1.60932
NS3 - SF1	6	-0.0658966	0.1575	20.0936	-0.418392	0.974685	6	-0.0686208	0.161074	15.6974	-0.426021	0.97316	5	-1.05666	0.175898	7.23135	-6.00723	0.00206535	5	-0.648888	0.114913	6.26502	-5.64678	0.00467772		NS3 - SF1	6	-0.285096	0.160623	15.4887	-1.77494	0.321468	6	0.0190513	0.157625	42.0387	0.120865	0.999358	5	-1.32633	0.209643	8.7254	-6.32663	0.000726254	5	-1.04852	0.135119	14.0764	-7.76002
LM19 - LM62	8	0.134808	0.0971495	94.8319	1.38764	0.510178	8	0.328747	0.0848666	17.7197	3.87369	0.005709	6	-0.378053	0.120938	8.83049	-3.126	0.0505982	6	-0.392115	0.107433	8.95797	-3.64984	0.0228358		LM19 - LM62	8	0.212621	0.118025	70.4388	1.8015	0.28127	8	0.318528	0.0805767	24.6273	3.9531	0.00300267	6	-0.406283	0.133743	20.4237	-3.03778	0.0299908	6	-0.299104	0.129509	9.07242	-2.30951
LM19 - NS3	8	0.523807	0.171201	26.1039	3.0596	0.0245714	8	0.699201	0.128357	10.6534	5.44729	0.00109143	6	0.88609	0.174129	7.21194	5.0887	0.00550914	6	0.653998	0.0806969	9.21416	8.10438	8.36279e-05		LM19 - NS3	8	0.60443	0.168176	15.99	3.59404	0.0117027	8	0.611178	0.126448	562.034	4.83344	1.03062e-05	6	1.13855	0.218892	10.1383	5.20142	0.00181523	6	0.990084	0.087287	14.7744	11.3429
LM19 - SF1	8	0.475202	0.121793	31.2612	3.90172	0.00254582	8	0.694417	0.110993	14.7909	6.2564	8.68684e-05	6	-0.163679	0.136043	8.92936	-1.20314	0.640228	6	0.0212965	0.11997	7.24566	0.177514	0.997827		LM19 - SF1	8	0.276578	0.125575	39.8558	2.20249	0.140075	8	0.713056	0.107422	11.7202	6.63787	0.000136757	6	-0.221289	0.129955	22.3267	-1.70281	0.34574	6	-0.0843676	0.117201	10.6361	-0.719856
LM62 - NS3	8	0.388999	0.144532	15.3304	2.69143	0.0704345	8	0.370454	0.136279	12.4539	2.71835	0.0751068	6	1.26414	0.163729	6.10819	7.72095	0.00094442	6	1.04611	0.100062	7.99108	10.4546	2.86329e-05		LM62 - NS3	8	0.391809	0.155738	13.8622	2.51582	0.101015	8	0.29265	0.135222	188.696	2.16422	0.137114	6	1.54483	0.212712	9.05075	7.26253	0.000219733	6	1.28919	0.144088	12.3395	8.94724
LM62 - SF1	8	0.340394	0.0800824	8.34256	4.25054	0.0109967	8	0.36567	0.120066	16.7019	3.04558	0.0338847	6	0.214373	0.12245	8.04702	1.7507	0.36029	6	0.413411	0.133766	8.69732	3.09055	0.0541041		LM62 - SF1	8	0.0639563	0.108353	20.9048	0.59026	0.933907	8	0.394528	0.117624	14.8142	3.35414	0.0204856	6	0.184994	0.119253	15.6906	1.55127	0.432616	6	0.214736	0.163946	14.6001	1.3098
NS3 - SF1	8	-0.0486054	0.162127	20.366	-0.299799	0.990349	8	-0.00478378	0.153913	15.3341	-0.0310811	0.999989	6	-1.04977	0.175182	7.16407	-5.99244	0.00216563	6	-0.632702	0.113417	6.28463	-5.57853	0.00493895		NS3 - SF1	8	-0.327852	0.161535	15.221	-2.0296	0.220375	8	0.101877	0.152748	38.2298	0.666964	0.908851	6	-1.35984	0.210351	8.71827	-6.46461	0.000623459	6	-1.07445	0.133134	14.4791	-8.07047
LM19 - LM62	10	0.156384	0.0954387	65.5049	1.63858	0.364508	10	0.272612	0.0785998	17.5064	3.46836	0.0136889	7	-0.38687	0.118422	8.77273	-3.26687	0.0413188	7	-0.375334	0.104536	8.93956	-3.59047	0.0250029		LM19 - LM62	10	0.247887	0.112433	70.6897	2.20476	0.13189	10	0.32822	0.0756231	24.8292	4.3402	0.00112364	7	-0.469064	0.139135	20.6294	-3.37128	0.0143819	7	-0.307879	0.125578	8.93058	-2.4517
LM19 - NS3	10	0.537398	0.173959	25.71	3.08923	0.0231548	10	0.585917	0.122542	10.1865	4.78136	0.00330725	7	0.839348	0.173105	7.08378	4.84879	0.00754965	7	0.611327	0.0798718	9.34544	7.65386	0.000122953		LM19 - NS3	10	0.495485	0.168375	15.37	2.94274	0.0438771	10	0.493797	0.11919	422.372	4.14292	0.000241651	7	1.06387	0.221797	10.4455	4.79661	0.00303255	7	0.889776	0.08956	13.9603	9.93498
LM19 - SF1	10	0.528568	0.121432	28.3434	4.35278	0.000866488	10	0.600543	0.104174	14.1791	5.76479	0.000242375	7	-0.168241	0.13358	8.8676	-1.25948	0.608399	7	0.0044766	0.118401	7.24169	0.037809	0.999979		LM19 - SF1	10	0.345239	0.12043	39.3997	2.86672	0.0322267	10	0.532737	0.10622	11.0564	5.0154	0.00186412	7	-0.268858	0.133863	22.865	-2.00847	0.214163	7	-0.116091	0.112359	10.424	-1.03321
LM62 - NS3	10	0.381014	0.149025	15.7147	2.55671	0.0891165	10	0.313305	0.130128	12.0129	2.40767	0.128335	7	1.22622	0.163276	6.04047	7.51007	0.00115561	7	0.986662	0.0975511	8.0147	10.1143	3.5896e-05		LM62 - NS3	10	0.247598	0.156879	13.4597	1.57828	0.422253	10	0.165577	0.128165	175.168	1.2919	0.569307	7	1.53294	0.214654	9.19204	7.14143	0.000232263	7	1.19765	0.143314	12.908	8.35688
LM62 - SF1	10	0.372184	0.0818092	8.39045	4.54942	0.00728675	10	0.327931	0.113	16.2852	2.90204	0.0456975	7	0.21863	0.120572	8.01776	1.81327	0.334082	7	0.379811	0.130979	8.59199	2.89979	0.0724086		LM62 - SF1	10	0.0973514	0.10375	21.2069	0.938331	0.7848	10	0.204517	0.116201	14.2773	1.76003	0.331024	7	0.200205	0.121662	15.7969	1.64558	0.383064	7	0.191788	0.158564	14.4931	1.20953
NS3 - SF1	10	-0.00882988	0.166871	20.598	-0.0529146	0.999945	10	0.014626	0.146995	14.9565	0.0994995	0.99963	7	-1.00759	0.174582	7.09743	-5.77143	0.0027933	7	-0.606851	0.112281	6.33002	-5.40474	0.00570635		NS3 - SF1	10	-0.150246	0.162705	14.9247	-0.923425	0.792918	10	0.0389402	0.148291	34.1797	0.262593	0.993538	7	-1.33273	0.211274	8.72046	-6.30806	0.000743461	7	-1.00587	0.131885	14.9795	-7.62685
LM19 - LM62	13	0.144162	0.0936353	41.0313	1.53962	0.423843	13	0.202509	0.0704839	17.3851	2.87312	0.0464763	8	-0.372354	0.116029	8.72028	-3.20913	0.045289	8	-0.29258	0.101975	8.94125	-2.86914	0.0734756		LM19 - LM62	13	0.232389	0.104252	68.0176	2.2291	0.125735	13	0.203569	0.0698611	25.2752	2.91391	0.0347917	8	-0.480289	0.144645	20.795	-3.32047	0.0159868	8	-0.33102	0.122345	8.89052	-2.70563
LM19 - NS3	13	0.456697	0.178444	25.1803	2.55933	0.0746201	13	0.448795	0.114693	9.58954	3.913	0.0138683	8	0.824726	0.172194	6.95729	4.78952	0.00843238	8	0.638912	0.0795749	9.4594	8.02906	7.76921e-05		LM19 - NS3	13	0.397981	0.169149	14.5251	2.35284	0.131319	13	0.280969	0.108879	246.178	2.58056	0.0507979	8	0.966553	0.224869	10.7531	4.29829	0.00616313	8	0.724233	0.092868	13.5444	7.79852
LM19 - SF1	13	0.470224	0.121522	24.563	3.86947	0.00370535	13	0.518096	0.0947533	13.3118	5.46784	0.00050563	8	-0.156195	0.131227	8.8067	-1.19026	0.647725	8	0.0411055	0.117174	7.25056	0.350809	0.984013		LM19 - SF1	13	0.327403	0.112983	37.8551	2.8978	0.0303096	13	0.275089	0.105924	10.1829	2.59704	0.102482	8	-0.360704	0.137994	23.2398	-2.61391	0.0685247	8	-0.170263	0.108235	10.357	-1.57309
LM62 - NS3	13	0.312535	0.156013	16.2895	2.00326	0.227006	13	0.246286	0.121663	11.4049	2.02432	0.235209	8	1.19708	0.162949	5.9767	7.34634	0.00136296	8	0.931492	0.0954205	8.08387	9.76197	4.41211e-05		LM62 - NS3	13	0.165593	0.159079	12.899	1.04095	0.729365	13	0.0773994	0.118155	140.728	0.655065	0.913615	8	1.44684	0.216791	9.33905	6.6739	0.000365941	8	1.05525	0.14324	13.5758	7.367
LM62 - SF1	13	0.326062	0.0852369	8.61139	3.82536	0.0187708	13	0.315587	0.103081	15.6649	3.06155	0.034432	8	0.216159	0.118838	7.99279	1.81894	0.331941	8	0.333686	0.128462	8.48374	2.59754	0.113375		LM62 - SF1	13	0.0950142	0.0972618	21.5224	0.976891	0.763848	13	0.0715194	0.115438	13.3511	0.619547	0.92404	8	0.119585	0.124396	15.8766	0.961326	0.77274	8	0.160756	0.153649	14.4051	1.04626
NS3 - SF1	13	0.0135271	0.174184	20.8813	0.0776597	0.999826	13	0.0693008	0.137157	14.3679	0.505264	0.95652	8	-0.980921	0.174098	7.03177	-5.63429	0.00331073	8	-0.597806	0.111516	6.40054	-5.36071	0.00577065		NS3 - SF1	13	-0.0705785	0.164932	14.4582	-0.427924	0.972744	13	-0.00587998	0.142478	28.1721	-0.0412693	0.999974	8	-1.32726	0.212411	8.73203	-6.24853	0.000791708	8	-0.894496	0.131394	15.5586	-6.80776
LM19 - LM62	15	0.160305	0.0929647	31.7994	1.72436	0.328243	15	0.112675	0.0661751	17.4716	1.70268	0.351874	10	-0.360449	0.111644	8.63073	-3.22855	0.0444866	10	-0.187803	0.0979611	8.9921	-1.91711	0.28661		LM19 - LM62	15	0.16987	0.0989635	63.9554	1.71649	0.323711	15	0.049549	0.0673544	25.3493	0.735646	0.881821	10	-0.510633	0.155967	21.0376	-3.27398	0.017552	10	-0.237336	0.118195	9.16303	-2.00801
LM19 - NS3	15	0.405104	0.181654	24.8639	2.23008	0.1428	15	0.322548	0.110141	9.28651	2.92851	0.0652261	10	0.827826	0.17072	6.71204	4.84902	0.00861766	10	0.584155	0.0805785	9.58981	7.24951	0.000167205		LM19 - NS3	15	0.234379	0.169978	14.0231	1.37888	0.531682	15	0.0412944	0.102478	173.025	0.402961	0.977805	10	0.846473	0.23149	11.3624	3.65664	0.0162096	10	0.659969	0.102157	13.6152	6.46036
LM19 - SF1	15	0.420714	0.122001	22.4755	3.44845	0.0111638	15	0.384161	0.0891437	12.8264	4.30945	0.0042335	10	-0.101473	0.126879	8.6857	-0.79976	0.852854	10	0.0616276	0.115788	7.30059	0.532243	0.948527		LM19 - SF1	15	0.186654	0.108229	36.173	1.72463	0.326096	15	0.113306	0.106737	9.73276	1.06154	0.719275	10	-0.393785	0.14685	23.5948	-2.68155	0.0592409	10	-0.137822	0.102467	10.7912	-1.34503
LM62 - NS3	15	0.244799	0.160821	16.6647	1.52218	0.447128	15	0.209873	0.116614	11.0536	1.79972	0.323496	10	1.18827	0.162673	5.8622	7.30468	0.00152326	10	0.771958	0.0924025	8.35964	8.35429	0.000115065		LM62 - NS3	15	0.0645094	0.160861	12.5654	0.401024	0.977226	15	-0.00825456	0.111946	114.428	-0.0737371	0.999855	10	1.35711	0.221628	9.64767	6.12336	0.000622916	10	0.897304	0.145191	15.1118	6.18016
LM62 - SF1	15	0.260409	0.0880298	8.84656	2.95819	0.0648719	15	0.271486	0.0970282	15.2785	2.79801	0.0578903	10	0.258976	0.115825	7.95318	2.23591	0.193613	10	0.24943	0.124307	8.25482	2.00656	0.25978		LM62 - SF1	15	0.0167843	0.0932598	21.5433	0.179974	0.997864	15	0.0637569	0.115858	12.7327	0.550302	0.944789	10	0.116848	0.130753	15.9917	0.893654	0.80822	10	0.0995142	0.14541	14.2664	0.684371
NS3 - SF1	15	0.0156103	0.179179	21.0339	0.0871215	0.999755	15	0.0616129	0.13102	13.9639	0.470255	0.964388	10	-0.929299	0.173483	6.90482	-5.35671	0.00466134	10	-0.522528	0.111125	6.61041	-4.70215	0.0104769		NS3 - SF1	15	-0.0477251	0.166722	14.1507	-0.286256	0.991459	15	0.0720115	0.139241	24.5024	0.517171	0.954177	10	-1.24026	0.215309	8.78324	-5.76035	0.00137867	10	-0.79779	0.132703	16.8227	-6.01186
LM19 - LM62	16	0.224603	0.0927929	28.4379	2.42048	0.095903	16	0.0478888	0.064421	17.5515	0.743373	0.878232	11	-0.312206	0.109668	8.59276	-2.84683	0.0782488	11	-0.128454	0.0965549	9.03006	-1.33037	0.568093		LM19 - LM62	16	0.0518337	0.0963766	61.2731	0.537825	0.949443	16	0.0559793	0.0665515	25.1973	0.841142	0.834373	11	-0.470762	0.161758	21.1263	-2.91029	0.0385362	11	-0.214642	0.117359	9.49	-1.82894
LM19 - NS3	16	0.437572	0.183322	24.7155	2.38691	0.106028	16	0.301238	0.108095	9.17027	2.78679	0.0816469	11	0.824435	0.17016	6.59461	4.84506	0.00903502	11	0.590277	0.0818595	9.60467	7.21086	0.000173309		LM19 - NS3	16	0.249287	0.170485	13.7909	1.46222	0.484571	16	0.0499696	0.0994467	146.909	0.502477	0.958374	11	0.853929	0.235024	11.661	3.63337	0.0162831	11	0.60957	0.107907	13.9529	5.64901
LM19 - SF1	16	0.427077	0.122365	21.5573	3.49019	0.0105559	16	0.279286	0.0865802	12.6301	3.22575	0.0304567	11	-0.105854	0.124896	8.62441	-0.847534	0.830831	11	0.0844047	0.115643	7.33827	0.729872	0.88231		LM19 - SF1	16	0.248313	0.105923	35.1272	2.34429	0.107319	16	0.0740752	0.107442	9.55506	0.689441	0.898707	11	-0.358803	0.15154	23.6272	-2.36771	0.11127	11	-0.04816	0.100966	11.3511	-0.476991
LM62 - NS3	16	0.212969	0.163265	16.8485	1.30444	0.572731	16	0.253349	0.114292	10.8988	2.21668	0.178943	11	1.13664	0.162725	5.81205	6.98505	0.00199412	11	0.718731	0.0915561	8.55829	7.85017	0.000161401		LM62 - NS3	16	0.197453	0.161845	12.4125	1.22002	0.626266	16	-0.00600964	0.109004	101.808	-0.0551322	0.999939	11	1.32469	0.224315	9.80803	5.90549	0.000773889	11	0.824212	0.147187	15.9078	5.59976
LM62 - SF1	16	0.202474	0.0895648	8.98696	2.26064	0.178963	16	0.231398	0.0942031	15.0998	2.45637	0.108319	11	0.206352	0.11456	7.93689	1.80127	0.339612	11	0.212858	0.122698	8.13328	1.73481	0.366666		LM62 - SF1	16	0.196479	0.0913686	21.4623	2.1504	0.169428	16	0.0180959	0.116345	12.4431	0.155537	0.998585	11	0.111959	0.134333	16.0415	0.833442	0.837852	11	0.166482	0.142177	14.1981	1.17096
NS3 - SF1	16	-0.0104958	0.181709	21.1009	-0.0577618	0.999928	16	-0.0219515	0.128096	13.7591	-0.171367	0.998121	11	-0.930289	0.173353	6.84426	-5.36644	0.00473379	11	-0.505873	0.111503	6.74462	-4.53684	0.0120208		NS3 - SF1	16	-0.000973485	0.167705	14.0016	-0.00580476	1	16	0.0241055	0.137828	22.8194	0.174895	0.998042	11	-1.21273	0.217063	8.82269	-5.58702	0.00167952	11	-0.65773	0.134481	17.4268	-4.89088
LM19 - LM62	17	0.210718	0.0927311	25.6813	2.27236	0.131091	17	0.132197	0.0629645	17.634	2.09955	0.1916	12	-0.333666	0.107846	8.55831	-3.0939	0.0546567	12	-0.0958089	0.0955744	9.06663	-1.00245	0.75198		LM19 - LM62	17	0.113165	0.0938324	58.2142	1.20604	0.625546	17	-0.142496	0.0660649	24.8772	-2.15691	0.163287	12	-0.583744	0.167624	21.1988	-3.48246	0.0109216	12	-0.134934	0.117378	9.94287	-1.14957
LM19 - NS3	17	0.446175	0.18503	24.5733	2.41137	0.101211	17	0.323998	0.106215	9.08048	3.05039	0.055232	12	0.800807	0.16972	6.48147	4.71841	0.0107753	12	0.566903	0.0836314	9.59801	6.77858	0.000286358		LM19 - NS3	17	0.34688	0.171053	13.5713	2.02792	0.225767	17	0.149524	0.0965433	126.073	1.54878	0.411727	12	0.668951	0.238699	11.9537	2.80248	0.0666912	12	0.617167	0.114252	14.4077	5.4018
LM19 - SF1	17	0.438342	0.122811	20.7178	3.56924	0.00918751	17	0.331124	0.0841976	12.4738	3.93271	0.00871918	12	-0.0764842	0.123048	8.56164	-0.62158	0.922462	12	0.080343	0.115866	7.38222	0.693415	0.896598		LM19 - SF1	17	0.274769	0.103668	33.9473	2.65046	0.0560435	17	0.185234	0.108341	9.41028	1.70973	0.370788	12	-0.436719	0.156384	23.5944	-2.7926	0.0468469	12	0.0800635	0.100451	12.157	0.797042
LM62 - NS3	17	0.235457	0.165736	17.0291	1.42068	0.504155	17	0.191801	0.112116	10.7599	1.71074	0.364503	12	1.13447	0.162903	5.76695	6.9641	0.00208796	12	0.662712	0.0911699	8.78565	7.26897	0.000252484		LM62 - NS3	17	0.233715	0.162887	12.2693	1.43483	0.502534	17	0.29202	0.106184	89.9901	2.75014	0.0356165	12	1.25269	0.227174	9.97161	5.51425	0.00123337	12	0.752101	0.14983	16.6671	5.01969
LM62 - SF1	17	0.227624	0.091186	9.14084	2.49626	0.126277	17	0.198927	0.0915289	14.9333	2.17338	0.175768	12	0.257182	0.113461	7.92165	2.26669	0.186007	12	0.176152	0.121419	8.00749	1.45078	0.505731		LM62 - SF1	17	0.161604	0.089557	21.3023	1.80448	0.298749	17	0.327729	0.117013	12.1735	2.80079	0.0661096	12	0.147024	0.138155	16.0929	1.0642	0.715285	12	0.214998	0.139592	14.1154	1.54019
NS3 - SF1	17	-0.00783262	0.18426	21.1622	-0.0425084	0.999971	17	0.00712662	0.125278	13.5525	0.0568863	0.99993	12	-0.877291	0.173342	6.78614	-5.06104	0.00667676	12	-0.48656	0.11226	6.894	-4.33421	0.0144814		NS3 - SF1	17	-0.0721116	0.168745	13.8569	-0.42734	0.97281	17	0.0357094	0.136558	21.2499	0.261496	0.993545	12	-1.10567	0.219012	8.87115	-5.04844	0.00328395	12	-0.537103	0.136974	17.9624	-3.92122
LM19 - LM62	18	0.219302	0.0927794	23.4068	2.36369	0.11239	18	0.105515	0.0618269	17.6933	1.70663	0.349605	13	-0.326675	0.106188	8.52624	-3.0764	0.0562714	13	-0.147809	0.0950327	9.09446	-1.55535	0.446921		LM19 - LM62	18	0.0194875	0.0913344	54.8414	0.213365	0.996527	18	-0.211052	0.0659016	24.3845	-3.20253	0.0184504	13	-0.591568	0.173557	21.2582	-3.40849	0.0128755	13	-0.304866	0.118253	10.5088	-2.57808
LM19 - NS3	18	0.412146	0.186777	24.437	2.20662	0.1496	18	0.264378	0.10451	9.01919	2.52969	0.121028	13	0.755348	0.1694	6.37318	4.45897	0.0147839	13	0.539383	0.0858638	9.58349	6.28185	0.000524848		LM19 - NS3	18	0.287058	0.171681	13.3639	1.67204	0.374944	18	0.112815	0.0937794	109.462	1.20298	0.62628	13	0.658642	0.242509	12.2395	2.71595	0.0761729	13	0.706995	0.121097	14.9308	5.83823
LM19 - SF1	18	0.434255	0.123339	19.9528	3.52083	0.0106556	18	0.340765	0.0820115	12.3644	4.1551	0.00597405	13	-0.0466909	0.121342	8.4966	-0.384788	0.979373	13	0.088591	0.116454	7.43121	0.760739	0.869589		LM19 - SF1	18	0.235103	0.10147	32.6394	2.31697	0.114902	18	0.180122	0.109429	9.29854	1.64601	0.401191	13	-0.405189	0.161369	23.5156	-2.51095	0.0840903	13	-0.07644	0.100936	13.1866	-0.757312
LM62 - NS3	18	0.192844	0.16823	17.2062	1.14631	0.666979	18	0.158863	0.110095	10.638	1.44296	0.501516	13	1.08202	0.163207	5.7271	6.62975	0.00275706	13	0.687192	0.0912499	9.02849	7.53088	0.000167679		LM62 - NS3	18	0.26757	0.163989	12.1359	1.63164	0.39815	18	0.323867	0.103494	79.1605	3.12934	0.0128486	13	1.25021	0.230197	10.1378	5.43103	0.00131167	13	1.01186	0.153087	17.3526	6.6097
LM62 - SF1	18	0.214953	0.092889	9.30691	2.31408	0.163595	18	0.23525	0.0890192	14.7799	2.64269	0.0783934	13	0.279985	0.112535	7.90646	2.48797	0.137514	13	0.2364	0.12048	7.87884	1.96215	0.278221		LM62 - SF1	18	0.215615	0.0878297	21.0498	2.45492	0.0970912	18	0.391174	0.11786	11.9279	3.31896	0.0273586	13	0.186378	0.142198	16.1491	1.3107	0.569531	13	0.228426	0.137692	14.0071	1.65896
NS3 - SF1	18	0.0221093	0.186831	21.2183	0.118338	0.999388	18	0.0763876	0.122573	13.3443	0.6232	0.922838	13	-0.802039	0.173449	6.73081	-4.62405	0.0109544	13	-0.450792	0.113388	7.05495	-3.97566	0.0213311		NS3 - SF1	18	-0.0519552	0.169843	13.7173	-0.305902	0.989618	18	0.0673067	0.135435	19.7985	0.496966	0.958822	13	-1.06383	0.221153	8.92838	-4.81038	0.00443214	13	-0.783435	0.140143	18.4062	-5.59027
LM19 - LM62	19	0.239378	0.0929376	21.5198	2.57568	0.0760904	19	0.0443507	0.0610258	17.6998	0.726754	0.885093	14	-0.362021	0.104699	8.49518	-3.45772	0.0324418	14	-0.183437	0.0949375	9.10795	-1.93219	0.280241		LM19 - LM62	19	0.0369283	0.0888865	51.2284	0.415455	0.975585	19	-0.183069	0.066064	23.7419	-2.77109	0.0489143	14	-0.549053	0.179551	21.3067	-3.05793	0.0279397	14	-0.361149	0.119964	11.1639	-3.01047
LM19 - NS3	19	0.399493	0.188562	24.306	2.11863	0.175523	19	0.193311	0.102988	8.98827	1.87702	0.302036	14	0.70701	0.169201	6.27026	4.17852	0.0207575	14	0.452362	0.0885218	9.57376	5.11018	0.00243893		LM19 - NS3	19	0.248264	0.172369	13.1686	1.4403	0.497879	19	0.0457413	0.0911675	96.2215	0.501728	0.958477	14	0.630942	0.246446	12.5175	2.56016	0.0980203	14	0.543056	0.128363	15.484	4.23061
LM19 - SF1	19	0.421184	0.123947	19.2575	3.39811	0.0144521	19	0.313133	0.0800381	12.3086	3.9123	0.0092375	14	-0.0691828	0.119783	8.42851	-0.577566	0.936196	14	0.0993525	0.117402	7.48445	0.846256	0.831383		LM19 - SF1	19	0.192069	0.0993299	31.2135	1.93365	0.235054	19	0.197726	0.110701	9.21934	1.78614	0.337936	14	-0.332328	0.166481	23.4062	-1.99619	0.217973	14	-0.100248	0.102407	14.373	-0.978913
LM62 - NS3	19	0.160115	0.170748	17.3796	0.937725	0.785272	19	0.14896	0.108237	10.5344	1.37624	0.538892	14	1.06903	0.163637	5.69267	6.53295	0.00303521	14	0.635799	0.0917947	9.27188	6.92632	0.000283164		LM62 - NS3	19	0.211336	0.165148	12.0124	1.27968	0.591846	19	0.22881	0.100945	69.4063	2.26668	0.115933	14	1.17999	0.233379	10.3062	5.05613	0.00213611	14	0.904204	0.15692	17.9383	5.76221
LM62 - SF1	19	0.181806	0.0946694	9.48383	1.92043	0.282367	19	0.268782	0.0866882	14.6399	3.10056	0.0336833	14	0.292838	0.111786	7.89036	2.61963	0.114672	14	0.28279	0.119889	7.74956	2.35875	0.165703		LM62 - SF1	19	0.155141	0.086192	20.6926	1.79995	0.301552	19	0.380795	0.118882	11.7091	3.20312	0.034078	14	0.216725	0.146444	16.2117	1.47992	0.47124	14	0.260901	0.136506	13.866	1.91128
NS3 - SF1	19	0.0216911	0.189421	21.2695	0.114512	0.999445	19	0.119822	0.119989	13.1344	0.998608	0.752821	14	-0.776193	0.173675	6.67861	-4.46922	0.0132465	14	-0.35301	0.114876	7.22391	-3.07297	0.0660484		NS3 - SF1	19	-0.0561948	0.170995	13.5835	-0.328633	0.987206	19	0.151985	0.134462	18.4662	1.13032	0.676059	14	-0.963269	0.22348	8.99408	-4.31032	0.00870602	14	-0.643303	0.143943	18.75	-4.46915
LM19 - LM62													15	-0.392064	0.103389	8.46357	-3.79211	0.0202176	15	-0.214409	0.0952899	9.10456	-2.25007	0.180832		LM19 - LM62													15	-0.634915	0.185599	21.3461	-3.42089	0.0124724	15	-0.388985	0.122477	11.8747	-3.17599
LM19 - NS3													15	0.651776	0.169124	6.17315	3.85384	0.0306673	15	0.379569	0.0915684	9.57811	4.1452	0.00979007		LM19 - NS3													15	0.503586	0.250506	12.7869	2.01027	0.234561	15	0.344593	0.135982	16.0393	2.5341
LM19 - SF1													15	-0.0682267	0.118379	8.35662	-0.576344	0.936538	15	0.0941428	0.118702	7.54164	0.793099	0.855628		LM19 - SF1													15	-0.321093	0.171709	23.2778	-1.86998	0.267863	15	-0.0840387	0.104824	15.6059	-0.801716
LM62 - NS3													15	1.04384	0.164191	5.66378	6.35748	0.00354084	15	0.593978	0.0927962	9.50158	6.40089	0.000469989		LM62 - NS3													15	1.1385	0.236713	10.4761	4.80963	0.00295126	15	0.733578	0.161287	18.4125	4.54828
LM62 - SF1													15	0.323837	0.111217	7.87252	2.91175	0.0763342	15	0.308552	0.119652	7.6226	2.57874	0.123831		LM62 - SF1													15	0.313822	0.150876	16.2813	2.07999	0.200852	15	0.304946	0.136052	13.6917	2.24139
NS3 - SF1													15	-0.720002	0.174019	6.62985	-4.13748	0.0196227	15	-0.285426	0.11671	7.39767	-2.4456	0.150671		NS3 - SF1													15	-0.824679	0.225987	9.06794	-3.64924	0.0224662	15	-0.428632	0.148327	18.9998	-2.88978
[truncated: 26 more columns]

## Sheet: Table S8
Table S8. Pairwise comparisons test using mixed models for determining the significant differences between the means of four wheat genotypes for light response curves after dark adaptation at last day of the stress treatments. S8.1 Maximum quantum efficiency of PSII photochemistry (Fv'/Fm'). S8.2 PSII operating efficiency (Fq'/Fm'). S8.3 Fraction of open PSII centers (oxidized QA) in steady state…
Table S8.1. Analysis for the maximum quantum efficiency of PSII photochemistry (Fv'/Fm') from light response curve of four wheat genotypes under different treatments in different time points.
Treatments	Control						Drought						Heat						Combined
contrast	Light.level	estimate	SE	df	t.ratio	p.value	Light.level	estimate	SE	df	t.ratio	p.value	Light.level	estimate	SE	df	t.ratio	p.value	Light.level	estimate	SE	df	t.ratio	p.value
LM19 - LM62	300	-0.0114911	0.00558935	13.7536	-2.05588	0.215718	300	-0.00119409	0.00765761	14.3615	-0.155935	0.998584	300	-0.000732449	0.00395078	45.2287	-0.185394	0.997705	300	0.00208068	0.0178454	24.204	0.116595	0.999417
LM19 - NS3	300	0.00697164	0.00558935	13.7536	1.24731	0.609036	300	0.0249871	0.00765761	14.3615	3.26304	0.025155	300	0.00377665	0.00395078	45.2287	0.955927	0.77485	300	-0.0115771	0.0192752	24.204	-0.600622	0.930869
LM19 - SF1	300	0.000276193	0.00558935	13.7536	0.0494141	0.999954	300	0.00429365	0.00765761	14.3615	0.560703	0.942082	300	0.0220736	0.00395078	45.2287	5.58714	7.34761e-06	300	0.0192604	0.0178454	24.204	1.07929	0.705138
LM62 - NS3	300	0.0184627	0.00558935	13.7536	3.30319	0.0243228	300	0.0261812	0.00765761	14.3615	3.41897	0.0186801	300	0.0045091	0.00395078	45.2287	1.14132	0.666226	300	-0.0136578	0.0192752	24.204	-0.708567	0.892718
LM62 - SF1	300	0.0117673	0.00558935	13.7536	2.1053	0.199765	300	0.00548774	0.00765761	14.3615	0.716638	0.888882	300	0.022806	0.00395078	45.2287	5.77254	3.91676e-06	300	0.0171797	0.0178454	24.204	0.962697	0.77152
NS3 - SF1	300	-0.00669545	0.00558935	13.7536	-1.19789	0.638185	300	-0.0206934	0.00765761	14.3615	-2.70233	0.0714153	300	0.0182969	0.00395078	45.2287	4.63122	0.000175861	300	0.0308375	0.0192752	24.204	1.59985	0.397427
LM19 - LM62	500	-0.00565755	0.00558935	13.7536	-1.0122	0.74519	500	-0.00452903	0.00765761	14.3615	-0.591441	0.933053	500	-0.00610245	0.00395078	45.2287	-1.54462	0.42006	500	-0.0066102	0.0178454	24.204	-0.370415	0.982235
LM19 - NS3	500	0.0112729	0.00558935	13.7536	2.01685	0.229017	500	0.0246305	0.00765761	14.3615	3.21647	0.0274815	500	0.000489633	0.00395078	45.2287	0.123933	0.999309	500	-0.0145828	0.0192752	24.204	-0.756557	0.872974
LM19 - SF1	500	0.0164467	0.00558935	13.7536	2.9425	0.0473971	500	0.00383923	0.00765761	14.3615	0.501361	0.957447	500	0.0273377	0.00395078	45.2287	6.91957	7.75183e-08	500	0.01677	0.0178454	24.204	0.939738	0.783963
LM62 - NS3	500	0.0169304	0.00558935	13.7536	3.02905	0.0404458	500	0.0291595	0.00765761	14.3615	3.80791	0.00884458	500	0.00659208	0.00395078	45.2287	1.66855	0.351902	500	-0.00797262	0.0192752	24.204	-0.41362	0.975609
LM62 - SF1	500	0.0221042	0.00558935	13.7536	3.9547	0.00714832	500	0.00836826	0.00765761	14.3615	1.0928	0.699323	500	0.0334401	0.00395078	45.2287	8.46419	4.20935e-10	500	0.0233802	0.0178454	24.204	1.31015	0.565552
NS3 - SF1	500	0.00517379	0.00558935	13.7536	0.925651	0.791823	500	-0.0207912	0.00765761	14.3615	-2.71511	0.069786	500	0.026848	0.00395078	45.2287	6.79564	1.18459e-07	500	0.0313528	0.0192752	24.204	1.62659	0.383158
LM19 - LM62	750	-0.00611532	0.00558935	13.7536	-1.0941	0.698806	750	-0.00943206	0.00765761	14.3615	-1.23172	0.617766	750	-0.00321586	0.00395078	45.2287	-0.813981	0.847543	750	-0.0119173	0.0178454	24.204	-0.667807	0.908166
LM19 - NS3	750	0.00483352	0.00558935	13.7536	0.864773	0.82265	750	0.0129057	0.00765761	14.3615	1.68534	0.366118	750	-0.00166189	0.00395078	45.2287	-0.42065	0.974665	750	-0.0236123	0.0192752	24.204	-1.22501	0.617472
LM19 - SF1	750	0.0267237	0.00558935	13.7536	4.78118	0.00154301	750	0.00236392	0.00765761	14.3615	0.308702	0.989359	750	0.0275863	0.00395078	45.2287	6.98251	6.25106e-08	750	0.0138364	0.0178454	24.204	0.775348	0.864803
LM62 - NS3	750	0.0109488	0.00558935	13.7536	1.95887	0.249928	750	0.0223378	0.00765761	14.3615	2.91707	0.0482048	750	0.00155396	0.00395078	45.2287	0.393331	0.979106	750	-0.011695	0.0192752	24.204	-0.606736	0.928948
LM62 - SF1	750	0.032839	0.00558935	13.7536	5.87528	0.000224981	750	0.011796	0.00765761	14.3615	1.54042	0.440633	750	0.0308022	0.00395078	45.2287	7.79649	3.93068e-09	750	0.0257537	0.0178454	24.204	1.44316	0.485869
NS3 - SF1	750	0.0218902	0.00558935	13.7536	3.9164	0.00768195	750	-0.0105418	0.00765761	14.3615	-1.37664	0.532562	750	0.0292482	0.00395078	45.2287	7.40316	1.48958e-08	750	0.0374487	0.0192752	24.204	1.94284	0.237243
LM19 - LM62	1000	-0.00705028	0.00558935	13.7536	-1.26138	0.600737	1000	-0.00785519	0.00765761	14.3615	-1.0258	0.737475	1000	-0.00427352	0.00395078	45.2287	-1.08169	0.702352	1000	-0.0112598	0.0178454	24.204	-0.630962	0.921048
LM19 - NS3	1000	-0.00237018	0.00558935	13.7536	-0.424053	0.973392	1000	0.00236062	0.00765761	14.3615	0.308271	0.989402	1000	-0.00612752	0.00395078	45.2287	-1.55097	0.416431	1000	-0.0243994	0.0192752	24.204	-1.26584	0.592554
LM19 - SF1	1000	0.0359669	0.00558935	13.7536	6.4349	8.90105e-05	1000	0.00257545	0.00765761	14.3615	0.336325	0.986348	1000	0.0251677	0.00395078	45.2287	6.37032	5.08411e-07	1000	0.0107662	0.0178454	24.204	0.603303	0.93003
LM62 - NS3	1000	0.0046801	0.00558935	13.7536	0.837323	0.835918	1000	0.0102158	0.00765761	14.3615	1.33407	0.557376	1000	-0.001854	0.00395078	45.2287	-0.469274	0.965415	1000	-0.0131396	0.0192752	24.204	-0.681684	0.903046
LM62 - SF1	1000	0.0430172	0.00558935	13.7536	7.69627	1.27569e-05	1000	0.0104306	0.00765761	14.3615	1.36213	0.540993	1000	0.0294412	0.00395078	45.2287	7.45201	1.26173e-08	1000	0.022026	0.0178454	24.204	1.23427	0.611824
NS3 - SF1	1000	0.0383371	0.00558935	13.7536	6.85895	4.52921e-05	1000	0.000214833	0.00765761	14.3615	0.0280548	0.999992	1000	0.0312952	0.00395078	45.2287	7.92129	2.58151e-09	1000	0.0351656	0.0192752	24.204	1.82439	0.286682
Table S8.2. Analysis for the PSII operating efficiency (Fq'/Fm') from light response curves of four wheat genotypes under different treatments in different time points.
Treatments	Control						Drought						Heat						Combined
contrast	Light.level	estimate	SE	df	t.ratio	p.value	Light.level	estimate	SE	df	t.ratio	p.value	Light.level	estimate	SE	df	t.ratio	p.value	Light.level	estimate	SE	df	t.ratio	p.value
LM19 - LM62	300	0.00649975	0.0114845	13.1392	0.565956	0.940453	300	-0.00120079	0.0163197	13.5821	-0.0735793	0.99985	300	-0.00447696	0.00807169	26.2928	-0.55465	0.94445	300	0.00360047	0.0233219	24.3073	0.154381	0.998652
LM19 - NS3	300	0.0183099	0.0114845	13.1392	1.5943	0.414614	300	0.0405068	0.0163197	13.5821	2.48208	0.107963	300	-0.0138235	0.00807169	26.2928	-1.71259	0.337495	300	-0.0115722	0.0251906	24.3073	-0.459388	0.967131
LM19 - SF1	300	0.0191229	0.0114845	13.1392	1.6651	0.378908	300	0.0198868	0.0163197	13.5821	1.21858	0.626121	300	0.0172824	0.00807169	26.2928	2.14111	0.166567	300	0.00914899	0.0233219	24.3073	0.392292	0.979045
LM62 - NS3	300	0.0118101	0.0114845	13.1392	1.02835	0.736351	300	0.0417076	0.0163197	13.5821	2.55566	0.0951257	300	-0.00934653	0.00807169	26.2928	-1.15794	0.657836	300	-0.0151727	0.0251906	24.3073	-0.602317	0.930344
LM62 - SF1	300	0.0126232	0.0114845	13.1392	1.09914	0.696164	300	0.0210876	0.0163197	13.5821	1.29216	0.582784	300	0.0217593	0.00807169	26.2928	2.69576	0.0551716	300	0.00554852	0.0233219	24.3073	0.23791	0.995133
NS3 - SF1	300	0.000813054	0.0114845	13.1392	0.0707955	0.999866	300	-0.02062	0.0163197	13.5821	-1.26351	0.599638	300	0.0311059	0.00807169	26.2928	3.8537	0.00354273	300	0.0207212	0.0251906	24.3073	0.822579	0.843229
LM19 - LM62	500	0.0141815	0.0114845	13.1392	1.23483	0.616915	500	0.00069452	0.0163197	13.5821	0.0425572	0.999971	500	-0.00701954	0.00807169	26.2928	-0.869649	0.820349	500	0.00306394	0.0233219	24.3073	0.131376	0.999167
LM19 - NS3	500	0.0393386	0.0114845	13.1392	3.42536	0.0203587	500	0.06539	0.0163197	13.5821	4.00682	0.00661936	500	-0.0128761	0.00807169	26.2928	-1.59522	0.398518	500	-0.0104551	0.0251906	24.3073	-0.41504	0.975371
LM19 - SF1	500	0.0384042	0.0114845	13.1392	3.34399	0.0236332	500	0.0158801	0.0163197	13.5821	0.973064	0.76666	500	0.0237419	0.00807169	26.2928	2.94138	0.0320687	500	0.00462025	0.0233219	24.3073	0.198108	0.997169
LM62 - NS3	500	0.0251571	0.0114845	13.1392	2.19052	0.176605	500	0.0646955	0.0163197	13.5821	3.96426	0.00716622	500	-0.00585661	0.00807169	26.2928	-0.725574	0.885985	500	-0.013519	0.0251906	24.3073	-0.53667	0.949215
LM62 - SF1	500	0.0242227	0.0114845	13.1392	2.10915	0.200639	500	0.0151856	0.0163197	13.5821	0.930507	0.789299	500	0.0307615	0.00807169	26.2928	3.81103	0.00394574	500	0.00155632	0.0233219	24.3073	0.0667319	0.99989
NS3 - SF1	500	-0.000934453	0.0114845	13.1392	-0.0813661	0.999796	500	-0.0495099	0.0163197	13.5821	-3.03375	0.0404907	500	0.0366181	0.00807169	26.2928	4.53661	0.00061048	500	0.0150753	0.0251906	24.3073	0.598452	0.931548
LM19 - LM62	750	0.0100016	0.0114845	13.1392	0.870873	0.819641	750	-0.0048306	0.0163197	13.5821	-0.295998	0.990565	750	-0.0222849	0.00807169	26.2928	-2.76088	0.0479115	750	-0.0053599	0.0233219	24.3073	-0.229822	0.995606
LM19 - NS3	750	0.0402059	0.0114845	13.1392	3.50087	0.017723	750	0.0604704	0.0163197	13.5821	3.70537	0.0116266	750	-0.0320841	0.00807169	26.2928	-3.9749	0.00260427	750	-0.0229551	0.0251906	24.3073	-0.911259	0.799048
LM19 - SF1	750	0.0532325	0.0114845	13.1392	4.63514	0.0022457	750	0.0119983	0.0163197	13.5821	0.735202	0.881283	750	0.000989009	0.00807169	26.2928	0.122528	0.999325	750	-0.00135543	0.0233219	24.3073	-0.0581184	0.999927
LM62 - NS3	750	0.0302044	0.0114845	13.1392	2.63	0.0849712	750	0.065301	0.0163197	13.5821	4.00136	0.00668702	750	-0.00979922	0.00807169	26.2928	-1.21402	0.623683	750	-0.0175952	0.0251906	24.3073	-0.698485	0.896658
LM62 - SF1	750	0.0432309	0.0114845	13.1392	3.76427	0.0109209	750	0.0168289	0.0163197	13.5821	1.0312	0.734637	750	0.0232739	0.00807169	26.2928	2.8834	0.0365403	750	0.00400447	0.0233219	24.3073	0.171704	0.998149
NS3 - SF1	750	0.0130266	0.0114845	13.1392	1.13427	0.675838	750	-0.0484722	0.0163197	13.5821	-2.97016	0.0454743	750	0.0330732	0.00807169	26.2928	4.09743	0.00190357	750	0.0215997	0.0251906	24.3073	0.857452	0.826395
LM19 - LM62	1000	0.00695603	0.0114845	13.1392	0.605687	0.928475	1000	-0.00243143	0.0163197	13.5821	-0.148987	0.998761	1000	-0.0288111	0.00807169	26.2928	-3.56941	0.0072124	1000	-0.00632566	0.0233219	24.3073	-0.271233	0.992839
LM19 - NS3	1000	0.0370573	0.0114845	13.1392	3.22671	0.0292822	1000	0.0432105	0.0163197	13.5821	2.64775	0.0810126	1000	-0.0422619	0.00807169	26.2928	-5.23582	9.7916e-05	1000	-0.0305855	0.0251906	24.3073	-1.21417	0.624053
LM19 - SF1	1000	0.0673048	0.0114845	13.1392	5.86047	0.000274794	1000	0.0110766	0.0163197	13.5821	0.678727	0.90339	1000	-0.0131047	0.00807169	26.2928	-1.62354	0.383299	1000	-0.00653612	0.0233219	24.3073	-0.280257	0.992117
LM62 - NS3	1000	0.0301012	0.0114845	13.1392	2.62102	0.0863013	1000	0.0456419	0.0163197	13.5821	2.79674	0.0622004	1000	-0.0134508	0.00807169	26.2928	-1.66641	0.360843	1000	-0.0242599	0.0251906	24.3073	-0.963055	0.77132
LM62 - SF1	1000	0.0603488	0.0114845	13.1392	5.25478	0.000759117	1000	0.013508	0.0163197	13.5821	0.827714	0.840453	1000	0.0157064	0.00807169	26.2928	1.94587	0.234015	1000	-0.00021046	0.0233219	24.3073	-0.00902415	1
NS3 - SF1	1000	0.0302476	0.0114845	13.1392	2.63376	0.0844197	1000	-0.0321339	0.0163197	13.5821	-1.96902	0.2467	1000	0.0291572	0.00807169	26.2928	3.61228	0.00648644	1000	0.0240494	0.0251906	24.3073	0.9547	0.775878
Table S8.3. Analysis for the fraction of open PSII centers (oxidized QA) in steady state (qL) from light response curves of four wheat genotypes under different treatments in different time points.
Treatments	Control						Drought						Heat						Combined
contrast	Light.level	estimate	SE	df	t.ratio	p.value	Light.level	estimate	SE	df	t.ratio	p.value	Light.level	estimate	SE	df	t.ratio	p.value	Light.level	estimate	SE	df	t.ratio	p.value
LM19 - LM62	300	0.0367693	0.00986773	13.6459	3.72622	0.011109	300	0.000606585	0.0125498	14.2964	0.0483341	0.999957	300	-0.00801193	0.00970381	33.9617	-0.825648	0.841924	300	0.00126748	0.0162026	30.8843	0.0782266	0.999824
LM19 - NS3	300	0.0172653	0.00986773	13.6459	1.74967	0.337366	300	0.0148411	0.0125498	14.2964	1.18257	0.64687	300	-0.0439682	0.00970381	33.9617	-4.53103	0.000386819	300	0.00654138	0.0175008	30.8843	0.373776	0.981857
LM19 - SF1	300	0.0327641	0.00986773	13.6459	3.32033	0.0237443	300	0.0241493	0.0125498	14.2964	1.92427	0.261507	300	-0.0235877	0.00970381	33.9617	-2.43077	0.0902871	300	-0.029426	0.0162026	30.8843	-1.81613	0.285255
LM62 - NS3	300	-0.019504	0.00986773	13.6459	-1.97655	0.243741	300	0.0142345	0.0125498	14.2964	1.13423	0.675267	300	-0.0359563	0.00970381	33.9617	-3.70538	0.00397702	300	0.0052739	0.0175008	30.8843	0.301352	0.990301
LM62 - SF1	300	-0.00400518	0.00986773	13.6459	-0.405887	0.976504	300	0.0235427	0.0125498	14.2964	1.87594	0.280768	300	-0.0155758	0.00970381	33.9617	-1.60512	0.389364	300	-0.0306935	0.0162026	30.8843	-1.89436	0.251259
NS3 - SF1	300	0.0154988	0.00986773	13.6459	1.57066	0.425867	300	0.00930827	0.0125498	14.2964	0.741703	0.878667	300	0.0203805	0.00970381	33.9617	2.10026	0.17353	300	-0.0359674	0.0175008	30.8843	-2.05518	0.190409
LM19 - LM62	500	0.0350933	0.00986773	13.6459	3.55637	0.0152747	500	0.00991675	0.0125498	14.2964	0.790189	0.857722	500	0.000933027	0.00970381	33.9617	0.0961506	0.999675	500	0.0186258	0.0162026	30.8843	1.14955	0.662298
LM19 - NS3	500	0.0443139	0.00986773	13.6459	4.49079	0.00267494	500	0.0592759	0.0125498	14.2964	4.72323	0.00155912	500	-0.0280791	0.00970381	33.9617	-2.89361	0.0319292	500	0.0127324	0.0175008	30.8843	0.727532	0.885317
LM19 - SF1	500	0.0332451	0.00986773	13.6459	3.36907	0.0216821	500	0.018944	0.0125498	14.2964	1.5095	0.457557	500	-0.0194742	0.00970381	33.9617	-2.00687	0.205494	500	-0.0254559	0.0162026	30.8843	-1.5711	0.409369
LM62 - NS3	500	0.00922063	0.00986773	13.6459	0.934423	0.787243	500	0.0493591	0.0125498	14.2964	3.93304	0.00700098	500	-0.0290121	0.00970381	33.9617	-2.98976	0.0253328	500	-0.00589338	0.0175008	30.8843	-0.336749	0.98659
LM62 - SF1	500	-0.0018482	0.00986773	13.6459	-0.187298	0.997553	500	0.00902725	0.0125498	14.2964	0.719312	0.887808	500	-0.0204073	0.00970381	33.9617	-2.10302	0.172646	500	-0.0440817	0.0162026	30.8843	-2.72065	0.0493309
NS3 - SF1	500	-0.0110688	0.00986773	13.6459	-1.12172	0.682869	500	-0.0403319	0.0125498	14.2964	-3.21373	0.0277385	500	0.00860483	0.00970381	33.9617	0.886748	0.811708	500	-0.0381883	0.0175008	30.8843	-2.18209	0.150749
LM19 - LM62	750	0.0267472	0.00986773	13.6459	2.71058	0.0723293	750	0.0082545	0.0125498	14.2964	0.657737	0.911107	750	-0.030691	0.00970381	33.9617	-3.16278	0.0165121	750	0.0132746	0.0162026	30.8843	0.819289	0.844896
LM19 - NS3	750	0.0538584	0.00986773	13.6459	5.45803	0.0004733	750	0.0687287	0.0125498	14.2964	5.47646	0.000391898	750	-0.0517734	0.00970381	33.9617	-5.33537	3.62399e-05	750	0.00695952	0.0175008	30.8843	0.397668	0.978313
LM19 - SF1	750	0.038861	0.00986773	13.6459	3.9382	0.00746708	750	0.0146324	0.0125498	14.2964	1.16594	0.656667	750	-0.055817	0.00970381	33.9617	-5.75208	1.04927e-05	750	-0.0247134	0.0162026	30.8843	-1.52527	0.43519
LM62 - NS3	750	0.0271112	0.00986773	13.6459	2.74746	0.0677372	750	0.0604742	0.0125498	14.2964	4.81872	0.00130443	750	-0.0210824	0.00970381	33.9617	-2.17259	0.151489	750	-0.0063151	0.0175008	30.8843	-0.360846	0.983613
LM62 - SF1	750	0.0121138	0.00986773	13.6459	1.22762	0.62074	750	0.00637789	0.0125498	14.2964	0.508205	0.955808	750	-0.025126	0.00970381	33.9617	-2.58929	0.0641966	750	-0.037988	0.0162026	30.8843	-2.34456	0.109835
NS3 - SF1	750	-0.0149974	0.00986773	13.6459	-1.51984	0.453056	750	-0.0540964	0.0125498	14.2964	-4.31052	0.00340019	750	-0.00404366	0.00970381	33.9617	-0.416708	0.975241	750	-0.0316729	0.0175008	30.8843	-1.80979	0.288133
LM19 - LM62	1000	0.0212575	0.00986773	13.6459	2.15424	0.185268	1000	0.00746688	0.0125498	14.2964	0.594978	0.93196	1000	-0.0333706	0.00970381	33.9617	-3.43892	0.00811322	1000	0.00864529	0.0162026	30.8843	0.533573	0.950205
LM19 - NS3	1000	0.0556963	0.00986773	13.6459	5.64429	0.000343282	1000	0.0555114	0.0125498	14.2964	4.42328	0.00274433	1000	-0.0502483	0.00970381	33.9617	-5.17821	5.77728e-05	1000	-0.00535464	0.0175008	30.8843	-0.305965	0.989861
LM19 - SF1	1000	0.0455056	0.00986773	13.6459	4.61155	0.00214356	1000	0.0121104	0.0125498	14.2964	0.964984	0.770928	1000	-0.0623487	0.00970381	33.9617	-6.42517	1.42431e-06	1000	-0.0225695	0.0162026	30.8843	-1.39296	0.513122
LM62 - NS3	1000	0.0344388	0.00986773	13.6459	3.49005	0.0172945	1000	0.0480446	0.0125498	14.2964	3.8283	0.00856116	1000	-0.0168777	0.00970381	33.9617	-1.73929	0.319828	1000	-0.0139999	0.0175008	30.8843	-0.799958	0.853887
LM62 - SF1	1000	0.0242481	0.00986773	13.6459	2.45731	0.112414	1000	0.00464352	0.0125498	14.2964	0.370006	0.98201	1000	-0.028978	0.00970381	33.9617	-2.98625	0.0255501	1000	-0.0312148	0.0162026	30.8843	-1.92653	0.238113
NS3 - SF1	1000	-0.0101908	0.00986773	13.6459	-1.03274	0.73376	1000	-0.043401	0.0125498	14.2964	-3.45829	0.0174131	1000	-0.0121003	0.00970381	33.9617	-1.24696	0.602053	1000	-0.0172149	0.0175008	30.8843	-0.983663	0.759696
Table S8.4. Analysis for the non-photochemical quenching (NPQ) from light response curve of four wheat genotypes under different treatments in different time points.
Treatments	Control						Drought						Heat						Combined
contrast	Light.level	estimate	SE	df	t.ratio	p.value	Light.level	estimate	SE	df	t.ratio	p.value	Light.level	estimate	SE	df	t.ratio	p.value	Light.level	estimate	SE	df	t.ratio	p.value
LM19 - LM62	300	0.00667774	0.0726955	14.3906	0.091859	0.999708	300	-0.0246219	0.102123	14.1307	-0.241101	0.994842	300	0.0494166	0.0552506	26.1121	0.894408	0.807777	300	0.0857693	0.0888012	31.9474	0.965858	0.769562
LM19 - NS3	300	-0.105981	0.0726955	14.3906	-1.45788	0.486089	300	-0.244312	0.102123	14.1307	-2.39233	0.123942	300	0.117254	0.0552506	26.1121	2.12222	0.172526	300	0.135297	0.0959162	31.9474	1.41057	0.502193
LM19 - SF1	300	-0.0204442	0.0726955	14.3906	-0.28123	0.991897	300	-0.0142162	0.102123	14.1307	-0.139208	0.99899	300	0.0615497	0.0552506	26.1121	1.11401	0.68431	300	0.0814082	0.0888012	31.9474	0.916747	0.7961
LM62 - NS3	300	-0.112659	0.0726955	14.3906	-1.54974	0.435575	300	-0.21969	0.102123	14.1307	-2.15123	0.184596	300	0.0678373	0.0552506	26.1121	1.22781	0.615289	300	0.0495277	0.0959162	31.9474	0.516364	0.954565
LM62 - SF1	300	-0.0271219	0.0726955	14.3906	-0.373089	0.98158	300	0.0104056	0.102123	14.1307	0.101893	0.999602	300	0.0121331	0.0552506	26.1121	0.219601	0.996166	300	-0.0043611	0.0888012	31.9474	-0.0491108	0.999957
NS3 - SF1	300	0.0855369	0.0726955	14.3906	1.17665	0.650308	300	0.230095	0.102123	14.1307	2.25313	0.156458	300	-0.0557042	0.0552506	26.1121	-1.00821	0.74607	300	-0.0538888	0.0959162	31.9474	-0.561832	0.942602
LM19 - LM62	500	-0.060335	0.0726955	14.3906	-0.829969	0.83943	500	0.00744132	0.102123	14.1307	0.0728665	0.999854	500	0.14438	0.0552506	26.1121	2.61319	0.0659277	500	0.155441	0.0888012	31.9474	1.75044	0.315407
LM19 - NS3	500	-0.183315	0.0726955	14.3906	-2.52168	0.0984266	500	-0.309147	0.102123	14.1307	-3.02721	0.0397497	500	0.182554	0.0552506	26.1121	3.30411	0.0138284	500	0.167107	0.0959162	31.9474	1.74222	0.319396
LM19 - SF1	500	-0.183296	0.0726955	14.3906	-2.52142	0.0984715	500	-0.00845451	0.102123	14.1307	-0.0827878	0.999786	500	0.100557	0.0552506	26.1121	1.82002	0.286909	500	0.137451	0.0888012	31.9474	1.54785	0.421948
LM62 - NS3	500	-0.12298	0.0726955	14.3906	-1.69171	0.362957	500	-0.316588	0.102123	14.1307	-3.10008	0.0346995	500	0.0381738	0.0552506	26.1121	0.690921	0.899631	500	0.011666	0.0959162	31.9474	0.121627	0.999343
LM62 - SF1	500	-0.122961	0.0726955	14.3906	-1.69145	0.363083	500	-0.0158958	0.102123	14.1307	-0.155654	0.998591	500	-0.0438231	0.0552506	26.1121	-0.79317	0.856884	500	-0.0179903	0.0888012	31.9474	-0.202591	0.996995
NS3 - SF1	500	1.88934e-05	0.0726955	14.3906	0.000259897	1	500	0.300692	0.102123	14.1307	2.94442	0.0463398	500	-0.0819969	0.0552506	26.1121	-1.48409	0.46102	500	-0.0296563	0.0959162	31.9474	-0.309189	0.989552
LM19 - LM62	750	-0.0526813	0.0726955	14.3906	-0.724684	0.885656	750	0.0595798	0.102123	14.1307	0.583415	0.935456	750	0.293429	0.0552506	26.1121	5.31088	8.21001e-05	750	0.205124	0.0888012	31.9474	2.30993	0.116976
LM19 - NS3	750	-0.190699	0.0726955	14.3906	-2.62325	0.0822278	750	-0.252844	0.102123	14.1307	-2.47588	0.107395	750	0.33724	0.0552506	26.1121	6.10383	1.05595e-05	750	0.274128	0.0959162	31.9474	2.85799	0.0355859
LM19 - SF1	750	-0.281515	0.0726955	14.3906	-3.87252	0.00778575	750	0.0106215	0.102123	14.1307	0.104008	0.999577	750	0.205202	0.0552506	26.1121	3.71403	0.00507204	750	0.213553	0.0888012	31.9474	2.40485	0.0965059
LM62 - NS3	750	-0.138017	0.0726955	14.3906	-1.89857	0.271369	750	-0.312424	0.102123	14.1307	-3.0593	0.0374446	750	0.0438113	0.0552506	26.1121	0.792956	0.856981	750	0.0690035	0.0959162	31.9474	0.719414	0.888634
LM62 - SF1	750	-0.228834	0.0726955	14.3906	-3.14784	0.0312401	750	-0.0489583	0.102123	14.1307	-0.479407	0.962426	750	-0.0882266	0.0552506	26.1121	-1.59684	0.397752	750	0.00842902	0.0888012	31.9474	0.0949201	0.999687
NS3 - SF1	750	-0.0908161	0.0726955	14.3906	-1.24927	0.607358	750	0.263465	0.102123	14.1307	2.57989	0.0895609	750	-0.132038	0.0552506	26.1121	-2.3898	0.104043	750	-0.0605745	0.0959162	31.9474	-0.631535	0.921103
LM19 - LM62	1000	-0.0398975	0.0726955	14.3906	-0.54883	0.945377	1000	0.0504004	0.102123	14.1307	0.493528	0.959253	1000	0.414222	0.0552506	26.1121	7.49715	3.29466e-07	1000	0.172644	0.0888012	31.9474	1.94417	0.230429
LM19 - NS3	1000	-0.26866	0.0726955	14.3906	-3.69569	0.0109483	1000	-0.196962	0.102123	14.1307	-1.92868	0.260267	1000	0.486239	0.0552506	26.1121	8.80061	1.59038e-08	1000	0.350537	0.0959162	31.9474	3.65462	0.00482549
LM19 - SF1	1000	-0.357657	0.0726955	14.3906	-4.91994	0.00106184	1000	0.000627273	0.102123	14.1307	0.00614235	1	1000	0.32461	0.0552506	26.1121	5.87523	1.89946e-05	1000	0.272907	0.0888012	31.9474	3.07324	0.0212941
LM62 - NS3	1000	-0.228762	0.0726955	14.3906	-3.14686	0.031298	1000	-0.247363	0.102123	14.1307	-2.42221	0.117784	1000	0.0720166	0.0552506	26.1121	1.30345	0.568998	1000	0.177893	0.0959162	31.9474	1.85467	0.267502
LM62 - SF1	1000	-0.31776	0.0726955	14.3906	-4.37111	0.00298942	1000	-0.0497731	0.102123	14.1307	-0.487386	0.960652	1000	-0.0896122	0.0552506	26.1121	-1.62192	0.384277	1000	0.100263	0.0888012	31.9474	1.12907	0.674609
NS3 - SF1	1000	-0.0889974	0.0726955	14.3906	-1.22425	0.62217	1000	0.19759	0.102123	14.1307	1.93483	0.257903	1000	-0.161629	0.0552506	26.1121	-2.92538	0.0333639	1000	-0.0776302	0.0959162	31.9474	-0.809354	0.849564
Table S8.5. Analysis for the electron transport rate (ETR) from light response curve of four wheat genotypes under different treatments in different time points.
Treatments	Control						Drought						Heat						Combined
contrast	Light.level	estimate	SE	df	t.ratio	p.value	Light.level	estimate	SE	df	t.ratio	p.value	Light.level	estimate	SE	df	t.ratio	p.value	Light.level	estimate	SE	df	t.ratio	p.value
LM19 - LM62	300	0.818969	3.4449	17.874	0.237733	0.995097	300	-0.1513	4.94229	18.6035	-0.0306133	0.999989	300	-0.564098	2.53989	34.1612	-0.222095	0.996059	300	0.453659	7.49644	35.5563	0.0605166	0.999919
LM19 - NS3	300	2.30704	3.4449	17.874	0.669697	0.907124	300	5.10386	4.94229	18.6035	1.03269	0.732837	300	-1.74176	2.53989	34.1612	-0.685763	0.90181	300	-1.4581	8.09708	35.5563	-0.180077	0.997887
LM19 - SF1	300	2.40949	3.4449	17.874	0.699435	0.895943	300	2.50574	4.94229	18.6035	0.506999	0.956399	300	2.17758	2.53989	34.1612	0.857352	0.826526	300	1.15277	7.49644	35.5563	0.153776	0.998679
LM62 - NS3	300	1.48807	3.4449	17.874	0.431964	0.97219	300	5.25516	4.94229	18.6035	1.0633	0.715279	300	-1.17766	2.53989	34.1612	-0.463667	0.966453	300	-1.91176	8.09708	35.5563	-0.236105	0.995282
LM62 - SF1	300	1.59052	3.4449	17.874	0.461702	0.966424	300	2.65704	4.94229	18.6035	0.537612	0.948707	300	2.74168	2.53989	34.1612	1.07945	0.7042	300	0.699114	7.49644	35.5563	0.0932595	0.999704
NS3 - SF1	300	0.102445	3.4449	17.874	0.0297381	0.99999	300	-2.59812	4.94229	18.6035	-0.525692	0.951788	300	3.91934	2.53989	34.1612	1.54312	0.423815	300	2.61087	8.09708	35.5563	0.322446	0.988213
LM19 - LM62	500	2.97812	3.4449	17.874	0.8645	0.82284	500	0.145849	4.94229	18.6035	0.0295104	0.99999	500	-1.4741	2.53989	34.1612	-0.580381	0.937302	500	0.643427	7.49644	35.5563	0.085831	0.999769
LM19 - NS3	500	8.26112	3.4449	17.874	2.39807	0.113537	500	13.7319	4.94229	18.6035	2.77845	0.0540441	500	-2.70399	2.53989	34.1612	-1.06461	0.712984	500	-2.19557	8.09708	35.5563	-0.271155	0.992904
LM19 - SF1	500	8.06488	3.4449	17.874	2.3411	0.12584	500	3.33482	4.94229	18.6035	0.674752	0.905321	500	4.9858	2.53989	34.1612	1.963	0.221802	500	0.970253	7.49644	35.5563	0.129429	0.99921
LM62 - NS3	500	5.283	3.4449	17.874	1.53357	0.439383	500	13.5861	4.94229	18.6035	2.74894	0.0573073	500	-1.22989	2.53989	34.1612	-0.484229	0.962084	500	-2.83899	8.09708	35.5563	-0.350619	0.98496
LM62 - SF1	500	5.08676	3.4449	17.874	1.47661	0.471242	500	3.18897	4.94229	18.6035	0.645242	0.915877	500	6.45991	2.53989	34.1612	2.54338	0.0708797	500	0.326826	7.49644	35.5563	0.0435975	0.99997
NS3 - SF1	500	-0.196235	3.4449	17.874	-0.0569639	0.999931	500	-10.3971	4.94229	18.6035	-2.1037	0.188402	500	7.68979	2.53989	34.1612	3.02761	0.0230336	500	3.16582	8.09708	35.5563	0.390983	0.979393
LM19 - LM62	750	3.1505	3.4449	17.874	0.914539	0.797442	750	-1.52164	4.94229	18.6035	-0.307881	0.989539	750	-7.01975	2.53989	34.1612	-2.7638	0.0432095	750	-1.68837	7.49644	35.5563	-0.225223	0.995896
LM19 - NS3	750	12.6649	3.4449	17.874	3.67641	0.00860562	750	19.0482	4.94229	18.6035	3.85412	0.0055596	750	-10.1065	2.53989	34.1612	-3.97912	0.00185591	750	-7.23087	8.09708	35.5563	-0.893021	0.808481
LM19 - SF1	750	16.7682	3.4449	17.874	4.86755	0.000666077	750	3.77946	4.94229	18.6035	0.764717	0.869215	750	0.311538	2.53989	34.1612	0.122658	0.999327	750	-0.426961	7.49644	35.5563	-0.0569552	0.999932
LM62 - NS3	750	9.51437	3.4449	17.874	2.76187	0.0569904	750	20.5698	4.94229	18.6035	4.162	0.00282819	750	-3.08675	2.53989	34.1612	-1.21531	0.621587	750	-5.5425	8.09708	35.5563	-0.684506	0.902313
LM62 - SF1	750	13.6177	3.4449	17.874	3.95301	0.00475424	750	5.30109	4.94229	18.6035	1.0726	0.709896	750	7.33129	2.53989	34.1612	2.88646	0.0324018	750	1.26141	7.49644	35.5563	0.168267	0.998273
NS3 - SF1	750	4.10336	3.4449	17.874	1.19114	0.64001	750	-15.2687	4.94229	18.6035	-3.0894	0.0286738	750	10.418	2.53989	34.1612	4.10177	0.00131388	750	6.8039	8.09708	35.5563	0.840291	0.834903
LM19 - LM62	1000	2.92153	3.4449	17.874	0.848074	0.83088	1000	-1.0212	4.94229	18.6035	-0.206625	0.996766	1000	-12.1007	2.53989	34.1612	-4.76426	0.000193583	1000	-2.65678	7.49644	35.5563	-0.354405	0.984484
LM19 - NS3	1000	15.564	3.4449	17.874	4.51799	0.00140777	1000	18.1484	4.94229	18.6035	3.67206	0.00827076	1000	-17.75	2.53989	34.1612	-6.9885	2.64399e-07	1000	-12.8459	8.09708	35.5563	-1.58649	0.39902
LM19 - SF1	1000	28.268	3.4449	17.874	8.20575	1.00323e-06	1000	4.65218	4.94229	18.6035	0.9413	0.783313	1000	-5.50397	2.53989	34.1612	-2.16701	0.152988	1000	-2.74517	7.49644	35.5563	-0.366197	0.982942
LM62 - NS3	1000	12.6425	3.4449	17.874	3.66992	0.00872575	1000	19.1696	4.94229	18.6035	3.87868	0.00526851	1000	-5.64932	2.53989	34.1612	-2.22424	0.137019	1000	-10.1892	8.09708	35.5563	-1.25837	0.594759
LM62 - SF1	1000	25.3465	3.4449	17.874	7.35768	4.58055e-06	1000	5.67338	4.94229	18.6035	1.14792	0.665563	1000	6.59671	2.53989	34.1612	2.59724	0.0629818	1000	-0.0883934	7.49644	35.5563	-0.0117914	0.999999
NS3 - SF1	1000	12.704	3.4449	17.874	3.68776	0.00839942	1000	-13.4962	4.94229	18.6035	-2.73076	0.0594058	1000	12.246	2.53989	34.1612	4.82148	0.000163592	1000	10.1008	8.09708	35.5563	1.24746	0.601521
